# Supplementary material
Source: publisher figshare collection journal article supplement (https://plos.figshare.com/articles/dataset/_/1575190)
Supplement: Supplementary file 1 [file 1 › S1_Table.xlsx]

## Sheet: prioritization_R_500.tsv
Supplementary Table 1: Whole-genome prioritization list.
Gene	DictyBase URL	Score	P-value	FDR-value	Comment
cf50-1	http://dictybase.org/gene/DDB_G0273175	0.229014	0.011976	0.278193	Validated prediction: defective growth in Gram- bacteria.
slob2	http://dictybase.org/gene/DDB_G0279303	0.215992	0.011976	0.278193
ranA	http://dictybase.org/gene/DDB_G0291235	0.212326	0.011976	0.278193
smlA	http://dictybase.org/gene/DDB_G0287587	0.201641	0.011976	0.278193	Validated prediction: defective growth in Gram- bacteria.
acbA	http://dictybase.org/gene/DDB_G0270658	0.196292	0.011976	0.278193	Validated prediction: defective growth in Gram- bacteria.
rps9	http://dictybase.org/gene/DDB_G0289877	0.194286	0.011976	0.278193
rps5	http://dictybase.org/gene/DDB_G0286075	0.1858	0.011976	0.278193
fbl	http://dictybase.org/gene/DDB_G0269878	0.182515	0.011976	0.278193
DD3-3	http://dictybase.org/gene/DDB_G0283095	0.181943	0.011976	0.278193
pakC	http://dictybase.org/gene/DDB_G0267450	0.1738	0.011976	0.278193
rps14	http://dictybase.org/gene/DDB_G0291526	0.172721	0.011976	0.278193
rpl11	http://dictybase.org/gene/DDB_G0279189	0.172473	0.011976	0.278193
rpl29	http://dictybase.org/gene/DDB_G0281469	0.170688	0.001996	0.119472
eif2b3	http://dictybase.org/gene/DDB_G0290693	0.168049	0.001996	0.119472
rps12	http://dictybase.org/gene/DDB_G0284237	0.16699	0.011976	0.278193
rplP0	http://dictybase.org/gene/DDB_G0286501	0.166671	0.011976	0.278193
DDB_G0271892	http://dictybase.org/gene/DDB_G0271892	0.165859	0.001996	0.119472
rplp1B	http://dictybase.org/gene/DDB_G0287995	0.165787	0.011976	0.278193
rab32A	http://dictybase.org/gene/DDB_G0283603	0.164616	0.011976	0.278193
nup54	http://dictybase.org/gene/DDB_G0270320	0.164016	0.011976	0.278193
DDB_G0276473	http://dictybase.org/gene/DDB_G0276473	0.163689	0.021956	0.335971
rpl10a	http://dictybase.org/gene/DDB_G0276871	0.161582	0.011976	0.278193
mpp10	http://dictybase.org/gene/DDB_G0279245	0.160837	0.001996	0.119472
rasB	http://dictybase.org/gene/DDB_G0292998	0.16062	0.031936	0.361464
rpl9	http://dictybase.org/gene/DDB_G0278959	0.160502	0.011976	0.278193
rps6	http://dictybase.org/gene/DDB_G0280823	0.160099	0.011976	0.278193
DDB_G0283065	http://dictybase.org/gene/DDB_G0283065	0.159747	0.001996	0.119472
rpl30	http://dictybase.org/gene/DDB_G0270380	0.158756	0.011976	0.278193
mlkA	http://dictybase.org/gene/DDB_G0279925	0.158651	0.031936	0.361464
crtp3	http://dictybase.org/gene/DDB_G0270204	0.158349	0.011976	0.278193
sac1	http://dictybase.org/gene/DDB_G0271630	0.157293	0.021956	0.335971
rps8	http://dictybase.org/gene/DDB_G0291864	0.157139	0.011976	0.278193
calA	http://dictybase.org/gene/DDB_G0279407	0.156675	0.031936	0.361464
mtpn	http://dictybase.org/gene/DDB_G0268038	0.156049	0.011976	0.278193
rps4	http://dictybase.org/gene/DDB_G0272825	0.156041	0.011976	0.278193
pabpc1A	http://dictybase.org/gene/DDB_G0293558	0.155983	0.011976	0.278193
rps13	http://dictybase.org/gene/DDB_G0284533	0.154917	0.011976	0.278193
ndkM	http://dictybase.org/gene/DDB_G0279911	0.154714	0.021956	0.335971
rpl18	http://dictybase.org/gene/DDB_G0279997	0.154231	0.011976	0.278193
DDB_G0270420	http://dictybase.org/gene/DDB_G0270420	0.154112	0.011976	0.278193
pirA	http://dictybase.org/gene/DDB_G0287855	0.15373	0.021956	0.335971
rplP2	http://dictybase.org/gene/DDB_G0283393	0.153596	0.011976	0.278193
rps16	http://dictybase.org/gene/DDB_G0284093	0.152694	0.011976	0.278193
rpl15-1	http://dictybase.org/gene/DDB_G0272893	0.151579	0.011976	0.278193
rps19	http://dictybase.org/gene/DDB_G0279207	0.15148	0.011976	0.278193
aspS1	http://dictybase.org/gene/DDB_G0272236	0.151226	0.021956	0.335971
rpl27	http://dictybase.org/gene/DDB_G0271298	0.150619	0.011976	0.278193
rps25	http://dictybase.org/gene/DDB_G0271148	0.15023	0.011976	0.278193
rps20	http://dictybase.org/gene/DDB_G0278429	0.149886	0.011976	0.278193
ppt3	http://dictybase.org/gene/DDB_G0292862	0.14983	0.021956	0.335971
eif3D	http://dictybase.org/gene/DDB_G0274627	0.149649	0.011976	0.278193
rps3	http://dictybase.org/gene/DDB_G0293000	0.149587	0.011976	0.278193
rpl5	http://dictybase.org/gene/DDB_G0278539	0.149473	0.011976	0.278193
rps15	http://dictybase.org/gene/DDB_G0285561	0.148891	0.011976	0.278193
rps10	http://dictybase.org/gene/DDB_G0286117	0.148306	0.011976	0.278193
nup210	http://dictybase.org/gene/DDB_G0288545	0.1476	0.021956	0.335971
rpl36	http://dictybase.org/gene/DDB_G0271668	0.14673	0.011976	0.278193
rpl10	http://dictybase.org/gene/DDB_G0288273	0.146531	0.011976	0.278193
eif3E	http://dictybase.org/gene/DDB_G0293052	0.146462	0.011976	0.278193
efa1B	http://dictybase.org/gene/DDB_G0284035	0.146378	0.021956	0.335971
rpl35	http://dictybase.org/gene/DDB_G0288349	0.146367	0.011976	0.278193
ubc9	http://dictybase.org/gene/DDB_G0287693	0.146046	0.001996	0.119472
eif3F	http://dictybase.org/gene/DDB_G0293254	0.145962	0.021956	0.335971
rpl17	http://dictybase.org/gene/DDB_G0285277	0.145853	0.011976	0.278193
rpl13a	http://dictybase.org/gene/DDB_G0275881	0.144849	0.011976	0.278193
rlp24	http://dictybase.org/gene/DDB_G0272789	0.144736	0.001996	0.119472
dscE	http://dictybase.org/gene/DDB_G0292552	0.143863	0.041916	0.385023
rpl36a	http://dictybase.org/gene/DDB_G0270984	0.143276	0.001996	0.119472
ctps	http://dictybase.org/gene/DDB_G0280567	0.143228	0.021956	0.335971
rps17	http://dictybase.org/gene/DDB_G0290141	0.142908	0.011976	0.278193
rpl28	http://dictybase.org/gene/DDB_G0282379	0.142817	0.011976	0.278193
DDB_G0292698	http://dictybase.org/gene/DDB_G0292698	0.142811	0.031936	0.361464
sevA	http://dictybase.org/gene/DDB_G0289327	0.142476	0.001996	0.119472
rpl23a	http://dictybase.org/gene/DDB_G0293502	0.142404	0.011976	0.278193
DDB_G0283625	http://dictybase.org/gene/DDB_G0283625	0.142263	0.041916	0.385023
mvpA	http://dictybase.org/gene/DDB_G0269156	0.141467	0.021956	0.335971
rpl22	http://dictybase.org/gene/DDB_G0288101	0.141422	0.011976	0.278193
eif5a	http://dictybase.org/gene/DDB_G0284861	0.141111	0.041916	0.385023
DDB_G0302588	http://dictybase.org/gene/DDB_G0302588	0.140884	0.021956	0.335971
rpl37	http://dictybase.org/gene/DDB_G0285971	0.14085	0.001996	0.119472
DDB_G0282815	http://dictybase.org/gene/DDB_G0282815	0.140678	0.011976	0.278193
commd6	http://dictybase.org/gene/DDB_G0286077	0.140613	0.041916	0.385023
strap	http://dictybase.org/gene/DDB_G0286457	0.140521	0.001996	0.119472
DDB_G0282853	http://dictybase.org/gene/DDB_G0282853	0.140015	0.031936	0.361464
gmfA	http://dictybase.org/gene/DDB_G0282595	0.139797	0.031936	0.361464
DDB_G0288141	http://dictybase.org/gene/DDB_G0288141	0.139745	0.021956	0.335971
DDB_G0281961	http://dictybase.org/gene/DDB_G0281961	0.139733	0.021956	0.335971
rps11	http://dictybase.org/gene/DDB_G0282601	0.139689	0.011976	0.278193
rdiA	http://dictybase.org/gene/DDB_G0291077	0.139625	0.041916	0.385023
DDB_G0267492	http://dictybase.org/gene/DDB_G0267492	0.139508	0.021956	0.335971
mvpB	http://dictybase.org/gene/DDB_G0291127	0.139476	0.031936	0.361464
rpl8	http://dictybase.org/gene/DDB_G0274113	0.139318	0.011976	0.278193
rps15a	http://dictybase.org/gene/DDB_G0276457	0.13929	0.011976	0.278193
abpC	http://dictybase.org/gene/DDB_G0269100	0.139264	0.011976	0.278193	Validated prediction: defective growth in Gram- bacteria.
mfeB	http://dictybase.org/gene/DDB_G0277911	0.139244	0.021956	0.335971
rpsA	http://dictybase.org/gene/DDB_G0270316	0.139143	0.011976	0.278193
tirA	http://dictybase.org/gene/DDB_G0289237	0.13903	0.031936	0.361464
rcbA	http://dictybase.org/gene/DDB_G0286357	0.138942	0.031936	0.361464
coaA	http://dictybase.org/gene/DDB_G0293898	0.138546	0.041916	0.385023
rpl3	http://dictybase.org/gene/DDB_G0291862	0.137362	0.021956	0.335971
rpl7	http://dictybase.org/gene/DDB_G0276441	0.137357	0.011976	0.278193
eif3B	http://dictybase.org/gene/DDB_G0283597	0.137348	0.021956	0.335971
rpl6	http://dictybase.org/gene/DDB_G0292460	0.137227	0.011976	0.278193
rps18	http://dictybase.org/gene/DDB_G0276415	0.136448	0.011976	0.278193
fimA	http://dictybase.org/gene/DDB_G0277855	0.135632	0.041916	0.385023
DDB_G0290371	http://dictybase.org/gene/DDB_G0290371	0.13531	0.021956	0.335971
rps23	http://dictybase.org/gene/DDB_G0272250	0.13492	0.011976	0.278193
cosA	http://dictybase.org/gene/DDB_G0272861	0.134289	0.031936	0.361464
nop58	http://dictybase.org/gene/DDB_G0268098	0.134135	0.011976	0.278193
DDB_G0272184	http://dictybase.org/gene/DDB_G0272184	0.134014	0.001996	0.119472
phdI	http://dictybase.org/gene/DDB_G0274775	0.133988	0.031936	0.361464
DDB_G0293090	http://dictybase.org/gene/DDB_G0293090	0.133951	0.021956	0.335971
pikB	http://dictybase.org/gene/DDB_G0283081	0.133828	0.031936	0.361464	Validated prediction: defective growth in Gram- bacteria.
rpl35a	http://dictybase.org/gene/DDB_G0270424	0.133791	0.011976	0.278193
tubB	http://dictybase.org/gene/DDB_G0269196	0.133532	0.011976	0.278193
DDB_G0287001	http://dictybase.org/gene/DDB_G0287001	0.133501	0.001996	0.119472
srp54	http://dictybase.org/gene/DDB_G0275455	0.13334	0.001996	0.119472
ponA	http://dictybase.org/gene/DDB_G0293522	0.133324	0.031936	0.361464
rps24	http://dictybase.org/gene/DDB_G0275473	0.13329	0.021956	0.335971
rpl14	http://dictybase.org/gene/DDB_G0277975	0.133193	0.011976	0.278193
ubqB	http://dictybase.org/gene/DDB_G0280755	0.133168	0.011976	0.278193
ponD	http://dictybase.org/gene/DDB_G0282423	0.133146	0.011976	0.278193
nup85	http://dictybase.org/gene/DDB_G0285415	0.13305	0.051896	0.401835
eif2s2	http://dictybase.org/gene/DDB_G0282035	0.133014	0.001996	0.119472
eif3I	http://dictybase.org/gene/DDB_G0285683	0.132947	0.021956	0.335971
rpl23	http://dictybase.org/gene/DDB_G0290315	0.132333	0.011976	0.278193
DDB_G0287647	http://dictybase.org/gene/DDB_G0287647	0.13222	0.041916	0.385023
DDB_G0275755	http://dictybase.org/gene/DDB_G0275755	0.132124	0.041916	0.385023
DDB_G0279059	http://dictybase.org/gene/DDB_G0279059	0.131926	0.021956	0.335971
DDB_G0276179	http://dictybase.org/gene/DDB_G0276179	0.131786	0.031936	0.361464
DDB_G0276099	http://dictybase.org/gene/DDB_G0276099	0.131776	0.011976	0.278193
crip	http://dictybase.org/gene/DDB_G0270314	0.131681	0.051896	0.401835
cak1-2	http://dictybase.org/gene/DDB_G0273737	0.131563	0.011976	0.278193
yod1	http://dictybase.org/gene/DDB_G0271346	0.131502	0.001996	0.119472
prdx5	http://dictybase.org/gene/DDB_G0285741	0.131342	0.041916	0.385023
drkA	http://dictybase.org/gene/DDB_G0289791	0.131279	0.011976	0.278193
cpnB-1	http://dictybase.org/gene/DDB_G0272875	0.131219	0.051896	0.401835
arpC	http://dictybase.org/gene/DDB_G0283755	0.13103	0.021956	0.335971
ubqC	http://dictybase.org/gene/DDB_G0276765	0.130939	0.011976	0.278193
DDB_G0268360	http://dictybase.org/gene/DDB_G0268360	0.130844	0.021956	0.335971
DDB_G0270910	http://dictybase.org/gene/DDB_G0270910	0.130726	0.021956	0.335971
rpl39	http://dictybase.org/gene/DDB_G0302511	0.130627	0.001996	0.119472
rpl27a	http://dictybase.org/gene/DDB_G0292388	0.130578	0.011976	0.278193
vps46	http://dictybase.org/gene/DDB_G0267394	0.13039	0.041916	0.385023
DDB_G0293498	http://dictybase.org/gene/DDB_G0293498	0.130344	0.011976	0.278193
rpl7a	http://dictybase.org/gene/DDB_G0277629	0.129501	0.021956	0.335971
ssr2	http://dictybase.org/gene/DDB_G0280313	0.129283	0.051896	0.401835
glgB	http://dictybase.org/gene/DDB_G0274105	0.129248	0.021956	0.335971
ddx6	http://dictybase.org/gene/DDB_G0291804	0.12923	0.031936	0.361464
rpl26	http://dictybase.org/gene/DDB_G0283741	0.129206	0.011976	0.278193
rps3a	http://dictybase.org/gene/DDB_G0277345	0.12904	0.031936	0.361464
lst8	http://dictybase.org/gene/DDB_G0292592	0.12896	0.081836	0.422442
rpl13	http://dictybase.org/gene/DDB_G0291870	0.128812	0.011976	0.278193
rpl18a	http://dictybase.org/gene/DDB_G0285881	0.128762	0.011976	0.278193
rpl12	http://dictybase.org/gene/DDB_G0288295	0.128753	0.011976	0.278193
tor	http://dictybase.org/gene/DDB_G0281569	0.128615	0.051896	0.401835
rpl21	http://dictybase.org/gene/DDB_G0279387	0.128612	0.011976	0.278193
ndufa9	http://dictybase.org/gene/DDB_G0272266	0.12861	0.041916	0.385023
DDB_G0274311	http://dictybase.org/gene/DDB_G0274311	0.128455	0.041916	0.385023
DDB_G0279613	http://dictybase.org/gene/DDB_G0279613	0.128116	0.021956	0.335971
DDB_G0275227	http://dictybase.org/gene/DDB_G0275227	0.128109	0.041916	0.385023
DDB_G0283915	http://dictybase.org/gene/DDB_G0283915	0.128068	0.011976	0.278193
DDB_G0278313	http://dictybase.org/gene/DDB_G0278313	0.127972	0.041916	0.385023
DDB_G0292354	http://dictybase.org/gene/DDB_G0292354	0.127854	0.041916	0.385023
rpl32	http://dictybase.org/gene/DDB_G0271976	0.127835	0.021956	0.335971
DDB_G0285619	http://dictybase.org/gene/DDB_G0285619	0.127781	0.011976	0.278193
shkB	http://dictybase.org/gene/DDB_G0288617	0.127292	0.031936	0.361464
npl4	http://dictybase.org/gene/DDB_G0290227	0.127227	0.011976	0.278193
DDB_G0292858	http://dictybase.org/gene/DDB_G0292858	0.127182	0.011976	0.278193
DDB_G0275383	http://dictybase.org/gene/DDB_G0275383	0.126869	0.031936	0.361464
rps30-1	http://dictybase.org/gene/DDB_G0273191	0.1266	0.001996	0.119472
fam49	http://dictybase.org/gene/DDB_G0272190	0.126333	0.051896	0.401835
aprA	http://dictybase.org/gene/DDB_G0281663	0.126098	0.051896	0.401835
eif3G	http://dictybase.org/gene/DDB_G0279549	0.126015	0.021956	0.335971
eif3L	http://dictybase.org/gene/DDB_G0272076	0.125825	0.031936	0.361464
DDB_G0276897	http://dictybase.org/gene/DDB_G0276897	0.12581	0.041916	0.385023
ctu1	http://dictybase.org/gene/DDB_G0282921	0.12562	0.001996	0.119472
ost1	http://dictybase.org/gene/DDB_G0293224	0.125429	0.041916	0.385023
rpl19	http://dictybase.org/gene/DDB_G0281565	0.125383	0.011976	0.278193
cln5	http://dictybase.org/gene/DDB_G0275299	0.124859	0.031936	0.361464
cak1-1	http://dictybase.org/gene/DDB_G0273059	0.12485	0.031936	0.361464
pikA	http://dictybase.org/gene/DDB_G0278727	0.12479	0.041916	0.385023	Validated prediction: defective growth in Gram- bacteria.
DDB_G0292288	http://dictybase.org/gene/DDB_G0292288	0.124667	0.041916	0.385023
DDB_G0293070	http://dictybase.org/gene/DDB_G0293070	0.124565	0.021956	0.335971
febA	http://dictybase.org/gene/DDB_G0291990	0.124532	0.011976	0.278193
psmC2	http://dictybase.org/gene/DDB_G0276917	0.124387	0.041916	0.385023
eif3A	http://dictybase.org/gene/DDB_G0272078	0.124323	0.021956	0.335971
DDB_G0293718	http://dictybase.org/gene/DDB_G0293718	0.124274	0.061876	0.411303
rps2	http://dictybase.org/gene/DDB_G0293742	0.124072	0.011976	0.278193
ncbp1	http://dictybase.org/gene/DDB_G0269814	0.123891	0.051896	0.401835
rplP1	http://dictybase.org/gene/DDB_G0277907	0.123877	0.011976	0.278193
DDB_G0286305	http://dictybase.org/gene/DDB_G0286305	0.123557	0.021956	0.335971
rpl31	http://dictybase.org/gene/DDB_G0279061	0.123484	0.011976	0.278193
rpl34	http://dictybase.org/gene/DDB_G0286389	0.123472	0.011976	0.278193
snrpF	http://dictybase.org/gene/DDB_G0278821	0.123468	0.021956	0.335971
rps21	http://dictybase.org/gene/DDB_G0293700	0.122648	0.011976	0.278193
DDB_G0267850	http://dictybase.org/gene/DDB_G0267850	0.122642	0.021956	0.335971
cdcD	http://dictybase.org/gene/DDB_G0288065	0.12257	0.031936	0.361464
phaZ	http://dictybase.org/gene/DDB_G0284359	0.122537	0.031936	0.361464
DDB_G0286269	http://dictybase.org/gene/DDB_G0286269	0.122347	0.021956	0.335971
rabQ	http://dictybase.org/gene/DDB_G0268760	0.12233	0.071856	0.418802
rpl37A	http://dictybase.org/gene/DDB_G0281093	0.122074	0.011976	0.278193
eRF3	http://dictybase.org/gene/DDB_G0277919	0.122063	0.011976	0.278193
rpl4	http://dictybase.org/gene/DDB_G0277803	0.122046	0.031936	0.361464
eif2b5	http://dictybase.org/gene/DDB_G0283163	0.121869	0.011976	0.278193
rps26	http://dictybase.org/gene/DDB_G0281677	0.121844	0.011976	0.278193
DDB_G0292918	http://dictybase.org/gene/DDB_G0292918	0.121794	0.051896	0.401835
DDB_G0272620	http://dictybase.org/gene/DDB_G0272620	0.121786	0.061876	0.411303
DDB_G0280145	http://dictybase.org/gene/DDB_G0280145	0.121603	0.051896	0.401835
swp1	http://dictybase.org/gene/DDB_G0289479	0.121346	0.021956	0.335971
leuS	http://dictybase.org/gene/DDB_G0285451	0.121312	0.021956	0.335971
nup62	http://dictybase.org/gene/DDB_G0274587	0.120999	0.021956	0.335971
rps7	http://dictybase.org/gene/DDB_G0289025	0.120961	0.011976	0.278193
DDB_G0267528	http://dictybase.org/gene/DDB_G0267528	0.120903	0.041916	0.385023
ggtA	http://dictybase.org/gene/DDB_G0274103	0.120861	0.071856	0.418802
gluS	http://dictybase.org/gene/DDB_G0287467	0.120743	0.051896	0.401835
DDB_G0285361	http://dictybase.org/gene/DDB_G0285361	0.120711	0.041916	0.385023
atp5O	http://dictybase.org/gene/DDB_G0283283	0.120591	0.061876	0.411303
mppB	http://dictybase.org/gene/DDB_G0288777	0.120492	0.021956	0.335971
tubA	http://dictybase.org/gene/DDB_G0287689	0.120485	0.041916	0.385023
fpaB-1	http://dictybase.org/gene/DDB_G0273251	0.120462	0.061876	0.411303
rps28	http://dictybase.org/gene/DDB_G0285597	0.120125	0.011976	0.278193
DDB_G0269708	http://dictybase.org/gene/DDB_G0269708	0.119967	0.031936	0.361464
DDB_G0278699	http://dictybase.org/gene/DDB_G0278699	0.119935	0.041916	0.385023
vamp7B	http://dictybase.org/gene/DDB_G0277173	0.119888	0.121756	0.445769
DDB_G0281815	http://dictybase.org/gene/DDB_G0281815	0.119844	0.061876	0.411303
erf1	http://dictybase.org/gene/DDB_G0288613	0.119786	0.021956	0.335971
nola4	http://dictybase.org/gene/DDB_G0281933	0.119704	0.021956	0.335971
dst4	http://dictybase.org/gene/DDB_G0288071	0.119515	0.001996	0.119472
ube2v	http://dictybase.org/gene/DDB_G0292596	0.119481	0.081836	0.422442
DDB_G0288519	http://dictybase.org/gene/DDB_G0288519	0.119344	0.041916	0.385023
efaAII	http://dictybase.org/gene/DDB_G0269136	0.119247	0.021956	0.335971
sec13	http://dictybase.org/gene/DDB_G0292052	0.119122	0.101796	0.428249
rasG	http://dictybase.org/gene/DDB_G0293434	0.119084	0.051896	0.401835
DDB_G0284167	http://dictybase.org/gene/DDB_G0284167	0.119052	0.031936	0.361464
eif2b4	http://dictybase.org/gene/DDB_G0290759	0.118935	0.021956	0.335971
DDB_G0281067	http://dictybase.org/gene/DDB_G0281067	0.11893	0.021956	0.335971
tifA	http://dictybase.org/gene/DDB_G0269192	0.118865	0.021956	0.335971
eppA	http://dictybase.org/gene/DDB_G0283327	0.11879	0.021956	0.335971
DDB_G0292624	http://dictybase.org/gene/DDB_G0292624	0.118554	0.051896	0.401835
ctnA	http://dictybase.org/gene/DDB_G0274597	0.11846	0.051896	0.401835
DDB_G0267804	http://dictybase.org/gene/DDB_G0267804	0.118262	0.021956	0.335971
atp5C1	http://dictybase.org/gene/DDB_G0292306	0.118249	0.031936	0.361464
nxnA	http://dictybase.org/gene/DDB_G0269160	0.118147	0.031936	0.361464
rps27	http://dictybase.org/gene/DDB_G0277635	0.11801	0.021956	0.335971
DDB_G0279437	http://dictybase.org/gene/DDB_G0279437	0.117826	0.011976	0.278193
ndufs8	http://dictybase.org/gene/DDB_G0277231	0.117747	0.051896	0.401835
limE	http://dictybase.org/gene/DDB_G0279415	0.117645	0.091816	0.425182
fadA	http://dictybase.org/gene/DDB_G0285211	0.11746	0.041916	0.385023
DDB_G0284939	http://dictybase.org/gene/DDB_G0284939	0.117455	0.051896	0.401835
pten	http://dictybase.org/gene/DDB_G0286557	0.1174	0.111776	0.43735	Validated prediction: defective growth in Gram- bacteria.
nola3	http://dictybase.org/gene/DDB_G0288347	0.117341	0.021956	0.335971
DDB_G0290177	http://dictybase.org/gene/DDB_G0290177	0.117105	0.021956	0.335971
eloB	http://dictybase.org/gene/DDB_G0281821	0.117102	0.071856	0.418802
syn7B	http://dictybase.org/gene/DDB_G0279133	0.117044	0.081836	0.422442
culE	http://dictybase.org/gene/DDB_G0278991	0.116995	0.061876	0.411303
gpaI	http://dictybase.org/gene/DDB_G0283419	0.116475	0.051896	0.401835
rpl22a	http://dictybase.org/gene/DDB_G0290091	0.116403	0.011976	0.278193
nup43	http://dictybase.org/gene/DDB_G0277955	0.116104	0.041916	0.385023
rabS	http://dictybase.org/gene/DDB_G0282537	0.116014	0.001996	0.119472
kinX	http://dictybase.org/gene/DDB_G0283391	0.115941	0.041916	0.385023
rpl38	http://dictybase.org/gene/DDB_G0268302	0.115919	0.011976	0.278193
DDB_G0274237	http://dictybase.org/gene/DDB_G0274237	0.115663	0.031936	0.361464
mpdu1	http://dictybase.org/gene/DDB_G0295677	0.115553	0.071856	0.418802
eif3C	http://dictybase.org/gene/DDB_G0279109	0.11551	0.021956	0.335971
rpl24	http://dictybase.org/gene/DDB_G0280229	0.115326	0.011976	0.278193
DDB_G0279571	http://dictybase.org/gene/DDB_G0279571	0.115254	0.041916	0.385023
ppt1	http://dictybase.org/gene/DDB_G0285533	0.115216	0.051896	0.401835
rvb2	http://dictybase.org/gene/DDB_G0280775	0.115127	0.031936	0.361464
rpa2	http://dictybase.org/gene/DDB_G0293560	0.115038	0.031936	0.361464
ints7	http://dictybase.org/gene/DDB_G0284483	0.114939	0.061876	0.411303
DDB_G0291191	http://dictybase.org/gene/DDB_G0291191	0.114939	0.051896	0.401835
DDB_G0283731	http://dictybase.org/gene/DDB_G0283731	0.114875	0.031936	0.361464
DDB_G0288551	http://dictybase.org/gene/DDB_G0288551	0.114848	0.021956	0.335971
DDB_G0283843	http://dictybase.org/gene/DDB_G0283843	0.114756	0.021956	0.335971
racH	http://dictybase.org/gene/DDB_G0269240	0.114735	0.091816	0.425182
usp40	http://dictybase.org/gene/DDB_G0289611	0.114591	0.001996	0.119472
dcd1A	http://dictybase.org/gene/DDB_G0270296	0.114491	0.021956	0.335971
DDB_G0287195	http://dictybase.org/gene/DDB_G0287195	0.114352	0.031936	0.361464
DDB_G0281913	http://dictybase.org/gene/DDB_G0281913	0.114296	0.041916	0.385023
ifdA	http://dictybase.org/gene/DDB_G0269146	0.114208	0.021956	0.335971
ppp2r4	http://dictybase.org/gene/DDB_G0270036	0.114107	0.071856	0.418802
tufM	http://dictybase.org/gene/DDB_G0289593	0.114078	0.031936	0.361464
porA	http://dictybase.org/gene/DDB_G0271848	0.113971	0.041916	0.385023
ctbsA	http://dictybase.org/gene/DDB_G0274233	0.113812	0.051896	0.401835
rab5B	http://dictybase.org/gene/DDB_G0282847	0.113799	0.051896	0.401835
efbA	http://dictybase.org/gene/DDB_G0288373	0.11358	0.021956	0.335971
DDB_G0290593	http://dictybase.org/gene/DDB_G0290593	0.113428	0.041916	0.385023
snd1	http://dictybase.org/gene/DDB_G0279659	0.113388	0.041916	0.385023
DDB_G0282313	http://dictybase.org/gene/DDB_G0282313	0.113367	0.021956	0.335971
psiO	http://dictybase.org/gene/DDB_G0280167	0.113346	0.001996	0.119472
vatE	http://dictybase.org/gene/DDB_G0275701	0.113306	0.041916	0.385023
ost3	http://dictybase.org/gene/DDB_G0285537	0.113236	0.091816	0.425182
acpB	http://dictybase.org/gene/DDB_G0272104	0.113197	0.081836	0.422442
rps29	http://dictybase.org/gene/DDB_G0272308	0.113088	0.021956	0.335971
mrpl2	http://dictybase.org/gene/DDB_G0294036	0.113066	0.021956	0.335971
tra2	http://dictybase.org/gene/DDB_G0278349	0.113054	0.021956	0.335971
mlcC	http://dictybase.org/gene/DDB_G0289563	0.11305	0.061876	0.411303
cfaB	http://dictybase.org/gene/DDB_G0277811	0.11293	0.001996	0.119472
cnxA	http://dictybase.org/gene/DDB_G0271144	0.112881	0.051896	0.401835
DDB_G0279731	http://dictybase.org/gene/DDB_G0279731	0.112817	0.081836	0.422442
efa1G	http://dictybase.org/gene/DDB_G0282979	0.112755	0.031936	0.361464
sglA	http://dictybase.org/gene/DDB_G0282819	0.112558	0.041916	0.385023
DDB_G0270402	http://dictybase.org/gene/DDB_G0270402	0.112554	0.001996	0.119472
cfaC	http://dictybase.org/gene/DDB_G0276475	0.112517	0.041916	0.385023
DDB_G0275921	http://dictybase.org/gene/DDB_G0275921	0.112454	0.071856	0.418802
ranbp1	http://dictybase.org/gene/DDB_G0287391	0.112205	0.021956	0.335971
uap56	http://dictybase.org/gene/DDB_G0269932	0.112074	0.021956	0.335971
DDB_G0275459	http://dictybase.org/gene/DDB_G0275459	0.112068	0.021956	0.335971
vti1B	http://dictybase.org/gene/DDB_G0283363	0.112016	0.061876	0.411303
DDB_G0278571	http://dictybase.org/gene/DDB_G0278571	0.11187	0.021956	0.335971
adcC	http://dictybase.org/gene/DDB_G0271022	0.111812	0.041916	0.385023
DDB_G0286429	http://dictybase.org/gene/DDB_G0286429	0.111506	0.071856	0.418802
dscA-1	http://dictybase.org/gene/DDB_G0273063	0.111391	0.041916	0.385023
nol5a	http://dictybase.org/gene/DDB_G0285679	0.111385	0.041916	0.385023
DDB_G0288355	http://dictybase.org/gene/DDB_G0288355	0.111304	0.011976	0.278193
eif3K	http://dictybase.org/gene/DDB_G0291404	0.111236	0.021956	0.335971
DDB_G0269046	http://dictybase.org/gene/DDB_G0269046	0.111213	0.061876	0.411303
DDB_G0275559	http://dictybase.org/gene/DDB_G0275559	0.110881	0.051896	0.401835
tspA	http://dictybase.org/gene/DDB_G0269110	0.110647	0.051896	0.401835
sbds	http://dictybase.org/gene/DDB_G0272324	0.110631	0.041916	0.385023
cinC	http://dictybase.org/gene/DDB_G0287685	0.110622	0.021956	0.335971
DDB_G0272628	http://dictybase.org/gene/DDB_G0272628	0.110589	0.051896	0.401835
DDB_G0295845	http://dictybase.org/gene/DDB_G0295845	0.11045	0.101796	0.428249
DDB_G0285621	http://dictybase.org/gene/DDB_G0285621	0.110353	0.041916	0.385023
atp7a	http://dictybase.org/gene/DDB_G0284141	0.110331	0.011976	0.278193
gtr2	http://dictybase.org/gene/DDB_G0276105	0.110171	0.051896	0.401835
DDB_G0287445	http://dictybase.org/gene/DDB_G0287445	0.110147	0.031936	0.361464
casK	http://dictybase.org/gene/DDB_G0276885	0.11012	0.021956	0.335971
eif3H	http://dictybase.org/gene/DDB_G0281153	0.109832	0.031936	0.361464
mrps10	http://dictybase.org/gene/DDB_G0279855	0.109657	0.021956	0.335971
ppp6c	http://dictybase.org/gene/DDB_G0272118	0.10957	0.081836	0.422442
cdk1	http://dictybase.org/gene/DDB_G0272813	0.109424	0.021956	0.335971
guf1	http://dictybase.org/gene/DDB_G0291708	0.109373	0.001996	0.119472
hatA	http://dictybase.org/gene/DDB_G0282141	0.109297	0.061876	0.411303
DDB_G0285901	http://dictybase.org/gene/DDB_G0285901	0.109257	0.081836	0.422442
mrpl11	http://dictybase.org/gene/DDB_G0294040	0.109117	0.021956	0.335971
arcE	http://dictybase.org/gene/DDB_G0288319	0.108918	0.081836	0.422442
rchy	http://dictybase.org/gene/DDB_G0281595	0.108841	0.011976	0.278193
ctxB	http://dictybase.org/gene/DDB_G0276893	0.108808	0.101796	0.428249
psiL	http://dictybase.org/gene/DDB_G0274441	0.108495	0.051896	0.401835
DDB_G0268790	http://dictybase.org/gene/DDB_G0268790	0.10848	0.081836	0.422442
pkiA	http://dictybase.org/gene/DDB_G0289391	0.108421	0.071856	0.418802
cepA	http://dictybase.org/gene/DDB_G0292142	0.108405	0.081836	0.422442
ssu72	http://dictybase.org/gene/DDB_G0272871	0.10835	0.001996	0.119472
pefA	http://dictybase.org/gene/DDB_G0291081	0.108209	0.061876	0.411303
DDB_G0285519	http://dictybase.org/gene/DDB_G0285519	0.108189	0.051896	0.401835
DDB_G0273295	http://dictybase.org/gene/DDB_G0273295	0.108091	0.021956	0.335971
apeh	http://dictybase.org/gene/DDB_G0292456	0.108082	0.051896	0.401835
DDB_G0285709	http://dictybase.org/gene/DDB_G0285709	0.10803	0.031936	0.361464
DDB_G0277731	http://dictybase.org/gene/DDB_G0277731	0.107867	0.061876	0.411303
vacB	http://dictybase.org/gene/DDB_G0279191	0.107791	0.091816	0.425182
DDB_G0282267	http://dictybase.org/gene/DDB_G0282267	0.107664	0.071856	0.418802
hbs1	http://dictybase.org/gene/DDB_G0283769	0.107585	0.001996	0.119472
DDB_G0275025	http://dictybase.org/gene/DDB_G0275025	0.107476	0.091816	0.425182
abnB	http://dictybase.org/gene/DDB_G0269518	0.107407	0.011976	0.278193
DDB_G0275749	http://dictybase.org/gene/DDB_G0275749	0.107333	0.071856	0.418802
DDB_G0293714	http://dictybase.org/gene/DDB_G0293714	0.107302	0.041916	0.385023
ndufa8	http://dictybase.org/gene/DDB_G0284799	0.107274	0.061876	0.411303
udpB	http://dictybase.org/gene/DDB_G0280985	0.107192	0.071856	0.418802
ppt2	http://dictybase.org/gene/DDB_G0288807	0.107123	0.071856	0.418802
DDB_G0289701	http://dictybase.org/gene/DDB_G0289701	0.107035	0.071856	0.418802
mrt4	http://dictybase.org/gene/DDB_G0276411	0.106962	0.041916	0.385023
glyS	http://dictybase.org/gene/DDB_G0284583	0.106949	0.041916	0.385023
sfbA	http://dictybase.org/gene/DDB_G0274107	0.106891	0.051896	0.401835
grn	http://dictybase.org/gene/DDB_G0283671	0.106888	0.001996	0.119472
cbpL	http://dictybase.org/gene/DDB_G0288785	0.106878	0.071856	0.418802
cxdA	http://dictybase.org/gene/DDB_G0281393	0.106804	0.061876	0.411303
nola2	http://dictybase.org/gene/DDB_G0289699	0.1068	0.031936	0.361464
pefB	http://dictybase.org/gene/DDB_G0293530	0.106731	0.081836	0.422442
nhp2l1	http://dictybase.org/gene/DDB_G0282243	0.106605	0.041916	0.385023
cxeA	http://dictybase.org/gene/DDB_G0269118	0.106481	0.071856	0.418802
psmD9	http://dictybase.org/gene/DDB_G0275753	0.106391	0.011976	0.278193
sf3b5	http://dictybase.org/gene/DDB_G0271312	0.106371	0.081836	0.422442
tmem14A	http://dictybase.org/gene/DDB_G0288759	0.106282	0.081836	0.422442
DDB_G0289011	http://dictybase.org/gene/DDB_G0289011	0.106255	0.051896	0.401835
DDB_G0289171	http://dictybase.org/gene/DDB_G0289171	0.10619	0.111776	0.43735
ndufa5	http://dictybase.org/gene/DDB_G0272394	0.106096	0.071856	0.418802
gemin5	http://dictybase.org/gene/DDB_G0288425	0.106069	0.021956	0.335971
hspE-1	http://dictybase.org/gene/DDB_G0273249	0.106017	0.051896	0.401835
uduF	http://dictybase.org/gene/DDB_G0277097	0.105956	0.011976	0.278193
DDB_G0275801	http://dictybase.org/gene/DDB_G0275801	0.10594	0.061876	0.411303
utp15	http://dictybase.org/gene/DDB_G0283581	0.105919	0.031936	0.361464
DDB_G0275953	http://dictybase.org/gene/DDB_G0275953	0.105859	0.031936	0.361464
sumo	http://dictybase.org/gene/DDB_G0286189	0.105759	0.001996	0.119472
csn8	http://dictybase.org/gene/DDB_G0275471	0.105707	0.091816	0.425182
gpt10	http://dictybase.org/gene/DDB_G0281103	0.105706	0.061876	0.411303
cinB	http://dictybase.org/gene/DDB_G0291121	0.105558	0.051896	0.401835
29C	http://dictybase.org/gene/DDB_G0291255	0.105401	0.071856	0.418802
pslA	http://dictybase.org/gene/DDB_G0267410	0.105356	0.071856	0.418802
stt3	http://dictybase.org/gene/DDB_G0285159	0.105213	0.051896	0.401835
drkC	http://dictybase.org/gene/DDB_G0281899	0.105177	0.021956	0.335971
DDB_G0269762	http://dictybase.org/gene/DDB_G0269762	0.105175	0.041916	0.385023
wbp1	http://dictybase.org/gene/DDB_G0291780	0.10511	0.081836	0.422442
DDB_G0282067	http://dictybase.org/gene/DDB_G0282067	0.105068	0.081836	0.422442
crlC	http://dictybase.org/gene/DDB_G0283619	0.105015	0.071856	0.418802
twfA	http://dictybase.org/gene/DDB_G0274437	0.10498	0.051896	0.401835
modA	http://dictybase.org/gene/DDB_G0269154	0.104876	0.091816	0.425182	Validated prediction: defective growth in Gram- bacteria.
eIF6	http://dictybase.org/gene/DDB_G0276493	0.104844	0.011976	0.278193
DDB_G0289453	http://dictybase.org/gene/DDB_G0289453	0.104708	0.001996	0.119472
ube2n	http://dictybase.org/gene/DDB_G0277267	0.104505	0.091816	0.425182
DDB_G0268270	http://dictybase.org/gene/DDB_G0268270	0.104495	0.081836	0.422442
lsm1	http://dictybase.org/gene/DDB_G0279837	0.104338	0.001996	0.119472
DDB_G0290299	http://dictybase.org/gene/DDB_G0290299	0.104277	0.011976	0.278193
nola1	http://dictybase.org/gene/DDB_G0279013	0.104257	0.031936	0.361464
DDB_G0276791	http://dictybase.org/gene/DDB_G0276791	0.104073	0.031936	0.361464
DDB_G0271242	http://dictybase.org/gene/DDB_G0271242	0.104044	0.061876	0.411303
pks16	http://dictybase.org/gene/DDB_G0275069	0.103953	0.031936	0.361464
mrpl21	http://dictybase.org/gene/DDB_G0288799	0.103917	0.051896	0.401835
rpc11	http://dictybase.org/gene/DDB_G0287707	0.103845	0.061876	0.411303
racB	http://dictybase.org/gene/DDB_G0279605	0.10384	0.081836	0.422442
pop4	http://dictybase.org/gene/DDB_G0288543	0.103738	0.011976	0.278193
pop5	http://dictybase.org/gene/DDB_G0291662	0.103673	0.031936	0.361464
srp19	http://dictybase.org/gene/DDB_G0275211	0.103669	0.041916	0.385023
DDB_G0284367	http://dictybase.org/gene/DDB_G0284367	0.103654	0.061876	0.411303
DDB_G0292286	http://dictybase.org/gene/DDB_G0292286	0.103483	0.011976	0.278193
DDB_G0294380	http://dictybase.org/gene/DDB_G0294380	0.103398	0.031936	0.361464
rtnlc	http://dictybase.org/gene/DDB_G0293088	0.103156	0.061876	0.411303
enoA	http://dictybase.org/gene/DDB_G0283137	0.103117	0.061876	0.411303
DDB_G0276781	http://dictybase.org/gene/DDB_G0276781	0.103069	0.081836	0.422442
DDB_G0285969	http://dictybase.org/gene/DDB_G0285969	0.102982	0.001996	0.119472
DDB_G0285689	http://dictybase.org/gene/DDB_G0285689	0.10296	0.011976	0.278193
DDB_G0285281	http://dictybase.org/gene/DDB_G0285281	0.102882	0.071856	0.418802
DDB_G0278007	http://dictybase.org/gene/DDB_G0278007	0.102836	0.001996	0.119472
DDB_G0287309	http://dictybase.org/gene/DDB_G0287309	0.102822	0.071856	0.418802
DDB_G0281367	http://dictybase.org/gene/DDB_G0281367	0.102819	0.031936	0.361464
DDB_G0287399	http://dictybase.org/gene/DDB_G0287399	0.102797	0.061876	0.411303
DDB_G0283707	http://dictybase.org/gene/DDB_G0283707	0.102673	0.001996	0.119472
pigF	http://dictybase.org/gene/DDB_G0284667	0.10267	0.011976	0.278193
DDB_G0286759	http://dictybase.org/gene/DDB_G0286759	0.102639	0.061876	0.411303
aplN	http://dictybase.org/gene/DDB_G0284339	0.102623	0.091816	0.425182
DDB_G0285279	http://dictybase.org/gene/DDB_G0285279	0.102498	0.081836	0.422442
psmC1	http://dictybase.org/gene/DDB_G0270784	0.102396	0.021956	0.335971
gchA	http://dictybase.org/gene/DDB_G0288481	0.102301	0.031936	0.361464
rac1A	http://dictybase.org/gene/DDB_G0277869	0.10225	0.081836	0.422442
agps	http://dictybase.org/gene/DDB_G0286183	0.102145	0.031936	0.361464
trap1	http://dictybase.org/gene/DDB_G0276947	0.102047	0.051896	0.401835
fpaA	http://dictybase.org/gene/DDB_G0269230	0.102044	0.031936	0.361464
DDB_G0268048	http://dictybase.org/gene/DDB_G0268048	0.101997	0.091816	0.425182
DDB_G0275959	http://dictybase.org/gene/DDB_G0275959	0.10182	0.041916	0.385023
DDB_G0283275	http://dictybase.org/gene/DDB_G0283275	0.101769	0.021956	0.335971
carmil	http://dictybase.org/gene/DDB_G0292386	0.101674	0.041916	0.385023
atp5e	http://dictybase.org/gene/DDB_G0276241	0.101653	0.071856	0.418802
DDB_G0272154	http://dictybase.org/gene/DDB_G0272154	0.101652	0.001996	0.119472
prmt5	http://dictybase.org/gene/DDB_G0287327	0.101623	0.001996	0.119472
nedd8l2	http://dictybase.org/gene/DDB_G0286927	0.101568	0.001996	0.119472
DDB_G0268116	http://dictybase.org/gene/DDB_G0268116	0.101521	0.071856	0.418802
ponB	http://dictybase.org/gene/DDB_G0286247	0.101504	0.011976	0.278193
cybA	http://dictybase.org/gene/DDB_G0267460	0.101415	0.011976	0.278193
ost2	http://dictybase.org/gene/DDB_G0291049	0.101365	0.091816	0.425182
DDB_G0283311	http://dictybase.org/gene/DDB_G0283311	0.101308	0.071856	0.418802
DDB_G0280801	http://dictybase.org/gene/DDB_G0280801	0.100997	0.071856	0.418802
DDB_G0290031	http://dictybase.org/gene/DDB_G0290031	0.100621	0.001996	0.119472
DDB_G0281701	http://dictybase.org/gene/DDB_G0281701	0.100617	0.001996	0.119472
DDB_G0288635	http://dictybase.org/gene/DDB_G0288635	0.100594	0.071856	0.418802
DDB_G0269354	http://dictybase.org/gene/DDB_G0269354	0.100593	0.001996	0.119472
eIF5b	http://dictybase.org/gene/DDB_G0278815	0.100394	0.011976	0.278193
vatP	http://dictybase.org/gene/DDB_G0274381	0.100244	0.071856	0.418802
rab32C	http://dictybase.org/gene/DDB_G0275675	0.10013	0.091816	0.425182
lzic	http://dictybase.org/gene/DDB_G0288823	0.100083	0.011976	0.278193
nup107	http://dictybase.org/gene/DDB_G0285579	0.099979	0.071856	0.418802
ilvB	http://dictybase.org/gene/DDB_G0278053	0.099866	0.091816	0.425182
prsB	http://dictybase.org/gene/DDB_G0272246	0.099753	0.041916	0.385023
DDB_G0283669	http://dictybase.org/gene/DDB_G0283669	0.099652	0.081836	0.422442
DDB_G0288133	http://dictybase.org/gene/DDB_G0288133	0.099429	0.031936	0.361464
ndkC-1	http://dictybase.org/gene/DDB_G0273069	0.099383	0.041916	0.385023
arpin	http://dictybase.org/gene/DDB_G0291009	0.099353	0.021956	0.335971
dmpA	http://dictybase.org/gene/DDB_G0275065	0.099343	0.071856	0.418802
DDB_G0277213	http://dictybase.org/gene/DDB_G0277213	0.099331	0.091816	0.425182
gp130	http://dictybase.org/gene/DDB_G0279921	0.099289	0.051896	0.401835
DDB_G0290547	http://dictybase.org/gene/DDB_G0290547	0.099264	0.101796	0.428249
pnkp	http://dictybase.org/gene/DDB_G0281229	0.099183	0.011976	0.278193
DDB_G0282619	http://dictybase.org/gene/DDB_G0282619	0.099174	0.051896	0.401835
DDB_G0276031	http://dictybase.org/gene/DDB_G0276031	0.09917	0.071856	0.418802
DDB_G0269670	http://dictybase.org/gene/DDB_G0269670	0.099021	0.051896	0.401835
DDB_G0283087	http://dictybase.org/gene/DDB_G0283087	0.099011	0.091816	0.425182
atp5D	http://dictybase.org/gene/DDB_G0269038	0.098997	0.061876	0.411303
aplG	http://dictybase.org/gene/DDB_G0269616	0.09891	0.051896	0.401835
DDB_G0279205	http://dictybase.org/gene/DDB_G0279205	0.098793	0.041916	0.385023
prp19	http://dictybase.org/gene/DDB_G0276803	0.098784	0.071856	0.418802
abpE-1	http://dictybase.org/gene/DDB_G0273447	0.098779	0.091816	0.425182
dpoA	http://dictybase.org/gene/DDB_G0274387	0.098703	0.011976	0.278193
DDB_G0287859	http://dictybase.org/gene/DDB_G0287859	0.098628	0.061876	0.411303
rbm8A	http://dictybase.org/gene/DDB_G0286007	0.098598	0.021956	0.335971
eIF1a	http://dictybase.org/gene/DDB_G0278205	0.098361	0.051896	0.401835
DDB_G0278025	http://dictybase.org/gene/DDB_G0278025	0.098301	0.001996	0.119472
wdr5	http://dictybase.org/gene/DDB_G0287273	0.098208	0.071856	0.418802
DDB_G0273321	http://dictybase.org/gene/DDB_G0273321	0.098027	0.121756	0.445769
abnC	http://dictybase.org/gene/DDB_G0269520	0.098023	0.001996	0.119472
DDB_G0291572	http://dictybase.org/gene/DDB_G0291572	0.098022	0.001996	0.119472
mrps17	http://dictybase.org/gene/DDB_G0277195	0.097927	0.011976	0.278193
DDB_G0289749	http://dictybase.org/gene/DDB_G0289749	0.097898	0.081836	0.422442
DDB_G0278921	http://dictybase.org/gene/DDB_G0278921	0.097815	0.001996	0.119472
DDB_G0278663	http://dictybase.org/gene/DDB_G0278663	0.097808	0.071856	0.418802
DDB_G0289679	http://dictybase.org/gene/DDB_G0289679	0.097786	0.061876	0.411303
DDB_G0287277	http://dictybase.org/gene/DDB_G0287277	0.097766	0.001996	0.119472
lap	http://dictybase.org/gene/DDB_G0279793	0.097742	0.051896	0.401835
DDB_G0286511	http://dictybase.org/gene/DDB_G0286511	0.09773	0.061876	0.411303
ppiA	http://dictybase.org/gene/DDB_G0282359	0.097698	0.081836	0.422442
DDB_G0272232	http://dictybase.org/gene/DDB_G0272232	0.097648	0.091816	0.425182
DDB_G0291003	http://dictybase.org/gene/DDB_G0291003	0.097546	0.021956	0.335971
ube2w	http://dictybase.org/gene/DDB_G0268938	0.097527	0.001996	0.119472
DDB_G0278943	http://dictybase.org/gene/DDB_G0278943	0.097326	0.001996	0.119472
DDB_G0292860	http://dictybase.org/gene/DDB_G0292860	0.097259	0.011976	0.278193
mppA2	http://dictybase.org/gene/DDB_G0290997	0.097225	0.041916	0.385023
DDB_G0279963	http://dictybase.org/gene/DDB_G0279963	0.097178	0.051896	0.401835
udkB	http://dictybase.org/gene/DDB_G0274559	0.097024	0.081836	0.422442
DDB_G0286341	http://dictybase.org/gene/DDB_G0286341	0.096978	0.051896	0.401835
argS1	http://dictybase.org/gene/DDB_G0272867	0.096931	0.001996	0.119472
dnajc13	http://dictybase.org/gene/DDB_G0286293	0.096919	0.051896	0.401835
racD	http://dictybase.org/gene/DDB_G0291976	0.096881	0.021956	0.335971
DDB_G0268646	http://dictybase.org/gene/DDB_G0268646	0.09672	0.061876	0.411303
empC	http://dictybase.org/gene/DDB_G0278969	0.096716	0.121756	0.445769
DDB_G0287645	http://dictybase.org/gene/DDB_G0287645	0.096621	0.011976	0.278193
snrpD3	http://dictybase.org/gene/DDB_G0273003	0.096533	0.071856	0.418802
serS	http://dictybase.org/gene/DDB_G0272660	0.096526	0.051896	0.401835
comA	http://dictybase.org/gene/DDB_G0289599	0.09649	0.091816	0.425182
copG	http://dictybase.org/gene/DDB_G0289371	0.096417	0.111776	0.43735
ibrA	http://dictybase.org/gene/DDB_G0274805	0.0964	0.091816	0.425182
DDB_G0275329	http://dictybase.org/gene/DDB_G0275329	0.096399	0.101796	0.428249
rabG2	http://dictybase.org/gene/DDB_G0290783	0.096391	0.071856	0.418802
pppA	http://dictybase.org/gene/DDB_G0283601	0.096348	0.101796	0.428249
DDB_G0270664	http://dictybase.org/gene/DDB_G0270664	0.096326	0.011976	0.278193
gpt9	http://dictybase.org/gene/DDB_G0286709	0.096213	0.001996	0.119472
DDB_G0279047	http://dictybase.org/gene/DDB_G0279047	0.096104	0.111776	0.43735
DDB_G0283417	http://dictybase.org/gene/DDB_G0283417	0.09605	0.011976	0.278193
psiP	http://dictybase.org/gene/DDB_G0280171	0.095873	0.031936	0.361464
udpA	http://dictybase.org/gene/DDB_G0284431	0.095858	0.031936	0.361464
DDB_G0290623	http://dictybase.org/gene/DDB_G0290623	0.095793	0.001996	0.119472
sibC	http://dictybase.org/gene/DDB_G0288195	0.095762	0.081836	0.422442
arcC	http://dictybase.org/gene/DDB_G0292804	0.095714	0.101796	0.428249
crtA	http://dictybase.org/gene/DDB_G0283539	0.0957	0.081836	0.422442
rabM	http://dictybase.org/gene/DDB_G0290829	0.095659	0.091816	0.425182
DDB_G0285693	http://dictybase.org/gene/DDB_G0285693	0.095609	0.001996	0.119472
rab1D	http://dictybase.org/gene/DDB_G0284985	0.095547	0.101796	0.428249
magoh	http://dictybase.org/gene/DDB_G0270866	0.09553	0.021956	0.335971
rae1	http://dictybase.org/gene/DDB_G0283835	0.095527	0.071856	0.418802
gtf2a2	http://dictybase.org/gene/DDB_G0285343	0.095398	0.101796	0.428249
rabA	http://dictybase.org/gene/DDB_G0291233	0.095294	0.011976	0.278193
DDB_G0277425	http://dictybase.org/gene/DDB_G0277425	0.095263	0.021956	0.335971
cyp524A1	http://dictybase.org/gene/DDB_G0269016	0.095263	0.041916	0.385023
DDB_G0284547	http://dictybase.org/gene/DDB_G0284547	0.095255	0.071856	0.418802
DDB_G0276847	http://dictybase.org/gene/DDB_G0276847	0.095236	0.071856	0.418802
DDB_G0267786	http://dictybase.org/gene/DDB_G0267786	0.095214	0.121756	0.445769
DDB_G0284201	http://dictybase.org/gene/DDB_G0284201	0.095147	0.141717	0.459848
DDB_G0283889	http://dictybase.org/gene/DDB_G0283889	0.094998	0.081836	0.422442
asnS1	http://dictybase.org/gene/DDB_G0275263	0.094976	0.061876	0.411303
spg1	http://dictybase.org/gene/DDB_G0291269	0.094799	0.071856	0.418802
DDB_G0294597	http://dictybase.org/gene/DDB_G0294597	0.094768	0.081836	0.422442
aprt	http://dictybase.org/gene/DDB_G0270174	0.094706	0.011976	0.278193
dicB	http://dictybase.org/gene/DDB_G0267470	0.094554	0.011976	0.278193
ddx52	http://dictybase.org/gene/DDB_G0274325	0.094517	0.001996	0.119472
purA	http://dictybase.org/gene/DDB_G0285429	0.094475	0.051896	0.401835
DDB_G0284245	http://dictybase.org/gene/DDB_G0284245	0.094465	0.101796	0.428249
glnA2	http://dictybase.org/gene/DDB_G0295755	0.094433	0.051896	0.401835
mrpl3	http://dictybase.org/gene/DDB_G0288983	0.094386	0.021956	0.335971
DDB_G0291340	http://dictybase.org/gene/DDB_G0291340	0.094363	0.061876	0.411303
gacC	http://dictybase.org/gene/DDB_G0284571	0.094316	0.081836	0.422442
DDB_G0279655	http://dictybase.org/gene/DDB_G0279655	0.09426	0.031936	0.361464
DDB_G0275039	http://dictybase.org/gene/DDB_G0275039	0.094251	0.081836	0.422442
DDB_G0274301	http://dictybase.org/gene/DDB_G0274301	0.094227	0.021956	0.335971
fahd1	http://dictybase.org/gene/DDB_G0275071	0.094193	0.051896	0.401835
DDB_G0289027	http://dictybase.org/gene/DDB_G0289027	0.094159	0.061876	0.411303
cxgE	http://dictybase.org/gene/DDB_G0277837	0.09394	0.101796	0.428249
DDB_G0291926	http://dictybase.org/gene/DDB_G0291926	0.093879	0.051896	0.401835
hemB	http://dictybase.org/gene/DDB_G0269444	0.093799	0.051896	0.401835
ppk1	http://dictybase.org/gene/DDB_G0293524	0.093791	0.081836	0.422442
bxdc1	http://dictybase.org/gene/DDB_G0292216	0.093782	0.041916	0.385023
csn3	http://dictybase.org/gene/DDB_G0291848	0.093758	0.011976	0.278193
gmppA	http://dictybase.org/gene/DDB_G0271858	0.093716	0.001996	0.119472
vasP	http://dictybase.org/gene/DDB_G0289541	0.093706	0.081836	0.422442
sec31	http://dictybase.org/gene/DDB_G0270992	0.09367	0.071856	0.418802
alyC	http://dictybase.org/gene/DDB_G0275121	0.093632	0.091816	0.425182
mobC	http://dictybase.org/gene/DDB_G0293706	0.093452	0.001996	0.119472
DDB_G0270366	http://dictybase.org/gene/DDB_G0270366	0.093382	0.011976	0.278193
mlcE	http://dictybase.org/gene/DDB_G0277859	0.093346	0.111776	0.43735
mileS	http://dictybase.org/gene/DDB_G0293030	0.093152	0.051896	0.401835
nup93	http://dictybase.org/gene/DDB_G0267480	0.09315	0.081836	0.422442
copA	http://dictybase.org/gene/DDB_G0267982	0.093126	0.081836	0.422442
rio1	http://dictybase.org/gene/DDB_G0280431	0.09308	0.001996	0.119472
DDB_G0272947	http://dictybase.org/gene/DDB_G0272947	0.093056	0.001996	0.119472
pARTg	http://dictybase.org/gene/DDB_G0271766	0.093005	0.001996	0.119472
rasC	http://dictybase.org/gene/DDB_G0281385	0.092997	0.081836	0.422442
DDB_G0292208	http://dictybase.org/gene/DDB_G0292208	0.092968	0.071856	0.418802
DDB_G0267448	http://dictybase.org/gene/DDB_G0267448	0.092962	0.061876	0.411303
ap1b1	http://dictybase.org/gene/DDB_G0279141	0.09294	0.081836	0.422442
DDB_G0269040	http://dictybase.org/gene/DDB_G0269040	0.092929	0.031936	0.361464
snrpG	http://dictybase.org/gene/DDB_G0282863	0.092758	0.101796	0.428249
DDB_G0275057	http://dictybase.org/gene/DDB_G0275057	0.092748	0.081836	0.422442
smtA	http://dictybase.org/gene/DDB_G0288907	0.092714	0.061876	0.411303
DDB_G0277257	http://dictybase.org/gene/DDB_G0277257	0.0927	0.041916	0.385023
qdpr	http://dictybase.org/gene/DDB_G0272684	0.092642	0.051896	0.401835
DDB_G0269126	http://dictybase.org/gene/DDB_G0269126	0.092636	0.011976	0.278193
srp9	http://dictybase.org/gene/DDB_G0267622	0.092627	0.061876	0.411303
mrpl53	http://dictybase.org/gene/DDB_G0292420	0.092605	0.011976	0.278193
DDB_G0286699	http://dictybase.org/gene/DDB_G0286699	0.092591	0.091816	0.425182
DDB_G0286619	http://dictybase.org/gene/DDB_G0286619	0.092443	0.031936	0.361464
sepsecs	http://dictybase.org/gene/DDB_G0280197	0.092438	0.001996	0.119472
hspD	http://dictybase.org/gene/DDB_G0267400	0.092432	0.081836	0.422442
impA	http://dictybase.org/gene/DDB_G0285455	0.092331	0.081836	0.422442
DDB_G0286231	http://dictybase.org/gene/DDB_G0286231	0.092261	0.091816	0.425182
srp72	http://dictybase.org/gene/DDB_G0291412	0.092252	0.121756	0.445769
alxA	http://dictybase.org/gene/DDB_G0275451	0.092222	0.031936	0.361464
utp5	http://dictybase.org/gene/DDB_G0275141	0.092219	0.051896	0.401835
adkA	http://dictybase.org/gene/DDB_G0283805	0.092191	0.061876	0.411303
DDB_G0284777	http://dictybase.org/gene/DDB_G0284777	0.092179	0.061876	0.411303
uqcrb	http://dictybase.org/gene/DDB_G0286171	0.092104	0.111776	0.43735
DDB_G0282517	http://dictybase.org/gene/DDB_G0282517	0.092075	0.051896	0.401835
DDB_G0288795	http://dictybase.org/gene/DDB_G0288795	0.092069	0.041916	0.385023
ddx1	http://dictybase.org/gene/DDB_G0269966	0.092043	0.001996	0.119472
mtyrS	http://dictybase.org/gene/DDB_G0279715	0.092017	0.031936	0.361464
DDB_G0280445	http://dictybase.org/gene/DDB_G0280445	0.091874	0.071856	0.418802
DDB_G0282757	http://dictybase.org/gene/DDB_G0282757	0.091871	0.001996	0.119472
ugt1	http://dictybase.org/gene/DDB_G0290339	0.09178	0.051896	0.401835
kil2	http://dictybase.org/gene/DDB_G0279183	0.091664	0.071856	0.418802
DDB_G0294591	http://dictybase.org/gene/DDB_G0294591	0.091659	0.111776	0.43735
upf2	http://dictybase.org/gene/DDB_G0281623	0.091586	0.001996	0.119472
DDB_G0285459	http://dictybase.org/gene/DDB_G0285459	0.09152	0.121756	0.445769
DDB_G0283127	http://dictybase.org/gene/DDB_G0283127	0.091502	0.081836	0.422442
pdiA	http://dictybase.org/gene/DDB_G0277863	0.091494	0.041916	0.385023
DDB_G0292664	http://dictybase.org/gene/DDB_G0292664	0.09146	0.121756	0.445769
arcB	http://dictybase.org/gene/DDB_G0282813	0.091411	0.101796	0.428249
psmB3	http://dictybase.org/gene/DDB_G0269772	0.091398	0.091816	0.425182
DDB_G0284849	http://dictybase.org/gene/DDB_G0284849	0.091392	0.001996	0.119472
cnrN	http://dictybase.org/gene/DDB_G0287969	0.091379	0.021956	0.335971
rbx1	http://dictybase.org/gene/DDB_G0287629	0.091363	0.131737	0.452811
tbck	http://dictybase.org/gene/DDB_G0267760	0.091337	0.021956	0.335971
corA	http://dictybase.org/gene/DDB_G0267382	0.091261	0.081836	0.422442
DDB_G0272152	http://dictybase.org/gene/DDB_G0272152	0.091246	0.081836	0.422442
acpA	http://dictybase.org/gene/DDB_G0267374	0.091242	0.111776	0.43735
rpb8	http://dictybase.org/gene/DDB_G0278039	0.091232	0.081836	0.422442
gpsn2	http://dictybase.org/gene/DDB_G0270270	0.091198	0.041916	0.385023
csn4	http://dictybase.org/gene/DDB_G0293844	0.091153	0.101796	0.428249
DDB_G0288213	http://dictybase.org/gene/DDB_G0288213	0.091129	0.001996	0.119472
nxf	http://dictybase.org/gene/DDB_G0286455	0.09095	0.031936	0.361464
aplP	http://dictybase.org/gene/DDB_G0292508	0.090851	0.011976	0.278193
csnk2b	http://dictybase.org/gene/DDB_G0284601	0.090801	0.011976	0.278193
DDB_G0292108	http://dictybase.org/gene/DDB_G0292108	0.090759	0.001996	0.119472
lsm6	http://dictybase.org/gene/DDB_G0275719	0.090621	0.001996	0.119472
copD	http://dictybase.org/gene/DDB_G0268702	0.090586	0.121756	0.445769
ndrB	http://dictybase.org/gene/DDB_G0288753	0.090573	0.011976	0.278193
DDB_G0271066	http://dictybase.org/gene/DDB_G0271066	0.090545	0.001996	0.119472
DDB_G0287005	http://dictybase.org/gene/DDB_G0287005	0.090492	0.101796	0.428249
DDB_G0284693	http://dictybase.org/gene/DDB_G0284693	0.090372	0.061876	0.411303
DDB_G0274215	http://dictybase.org/gene/DDB_G0274215	0.090368	0.081836	0.422442
arcA	http://dictybase.org/gene/DDB_G0277825	0.090325	0.061876	0.411303
rpb12	http://dictybase.org/gene/DDB_G0283365	0.090323	0.061876	0.411303
kil1	http://dictybase.org/gene/DDB_G0267630	0.090249	0.071856	0.418802
tkrA	http://dictybase.org/gene/DDB_G0292104	0.090245	0.031936	0.361464
rio2	http://dictybase.org/gene/DDB_G0282099	0.090174	0.001996	0.119472
eif2s3	http://dictybase.org/gene/DDB_G0278967	0.090029	0.041916	0.385023
arpD	http://dictybase.org/gene/DDB_G0280887	0.090027	0.091816	0.425182
ostc	http://dictybase.org/gene/DDB_G0306378	0.089971	0.091816	0.425182
DDB_G0277047	http://dictybase.org/gene/DDB_G0277047	0.089877	0.001996	0.119472
DDB_G0293366	http://dictybase.org/gene/DDB_G0293366	0.089808	0.061876	0.411303
gxcC	http://dictybase.org/gene/DDB_G0284845	0.089728	0.071856	0.418802
rab1E	http://dictybase.org/gene/DDB_G0275969	0.089695	0.031936	0.361464
DDB_G0276361	http://dictybase.org/gene/DDB_G0276361	0.089656	0.101796	0.428249
pkgC	http://dictybase.org/gene/DDB_G0286125	0.089637	0.021956	0.335971
argE	http://dictybase.org/gene/DDB_G0267380	0.089622	0.081836	0.422442
dhkI-1	http://dictybase.org/gene/DDB_G0273475	0.089608	0.011976	0.278193
DDB_G0287609	http://dictybase.org/gene/DDB_G0287609	0.089587	0.011976	0.278193
DDB_G0286021	http://dictybase.org/gene/DDB_G0286021	0.089502	0.031936	0.361464
dscD-1	http://dictybase.org/gene/DDB_G0273067	0.089188	0.081836	0.422442
rhgA	http://dictybase.org/gene/DDB_G0283389	0.08914	0.041916	0.385023
DDB_G0288081	http://dictybase.org/gene/DDB_G0288081	0.088886	0.061876	0.411303
DDB_G0275127	http://dictybase.org/gene/DDB_G0275127	0.088801	0.111776	0.43735
pigT	http://dictybase.org/gene/DDB_G0291490	0.088651	0.061876	0.411303
DDB_G0295473	http://dictybase.org/gene/DDB_G0295473	0.088635	0.001996	0.119472
pkbA	http://dictybase.org/gene/DDB_G0268620	0.08859	0.071856	0.418802
mrpl15	http://dictybase.org/gene/DDB_G0284405	0.08859	0.011976	0.278193
cprE	http://dictybase.org/gene/DDB_G0272815	0.088567	0.121756	0.445769
scrA	http://dictybase.org/gene/DDB_G0285253	0.088552	0.091816	0.425182
thoc7	http://dictybase.org/gene/DDB_G0275979	0.088448	0.101796	0.428249
psmC3	http://dictybase.org/gene/DDB_G0284415	0.088399	0.031936	0.361464
lyrm4	http://dictybase.org/gene/DDB_G0290725	0.088362	0.111776	0.43735
abnA	http://dictybase.org/gene/DDB_G0270884	0.088346	0.021956	0.335971
DDB_G0279527	http://dictybase.org/gene/DDB_G0279527	0.088285	0.051896	0.401835
DDB_G0272398	http://dictybase.org/gene/DDB_G0272398	0.088283	0.101796	0.428249
DDB_G0274407	http://dictybase.org/gene/DDB_G0274407	0.088264	0.021956	0.335971
DDB_G0288869	http://dictybase.org/gene/DDB_G0288869	0.088258	0.001996	0.119472
DDB_G0286063	http://dictybase.org/gene/DDB_G0286063	0.088231	0.101796	0.428249
DDB_G0274549	http://dictybase.org/gene/DDB_G0274549	0.088199	0.071856	0.418802
abpB	http://dictybase.org/gene/DDB_G0279081	0.088147	0.101796	0.428249
cbhA	http://dictybase.org/gene/DDB_G0268446	0.088121	0.001996	0.119472
DDB_G0278105	http://dictybase.org/gene/DDB_G0278105	0.088117	0.001996	0.119472
cyp525A1	http://dictybase.org/gene/DDB_G0272652	0.088106	0.021956	0.335971
DDB_G0272718	http://dictybase.org/gene/DDB_G0272718	0.088012	0.001996	0.119472
limC	http://dictybase.org/gene/DDB_G0277881	0.087985	0.101796	0.428249
DDB_G0275707	http://dictybase.org/gene/DDB_G0275707	0.087872	0.091816	0.425182
ndufab1	http://dictybase.org/gene/DDB_G0291866	0.087871	0.071856	0.418802
dcd1B	http://dictybase.org/gene/DDB_G0292768	0.087772	0.131737	0.452811
gskA	http://dictybase.org/gene/DDB_G0272110	0.087691	0.081836	0.422442
rexo2-1	http://dictybase.org/gene/DDB_G0273355	0.087676	0.021956	0.335971
cnrI	http://dictybase.org/gene/DDB_G0269768	0.087676	0.061876	0.411303
DDB_G0284021	http://dictybase.org/gene/DDB_G0284021	0.087647	0.031936	0.361464
cofB	http://dictybase.org/gene/DDB_G0291970	0.087632	0.151697	0.466919
DDB_G0287947	http://dictybase.org/gene/DDB_G0287947	0.087628	0.101796	0.428249
apm2	http://dictybase.org/gene/DDB_G0277139	0.087612	0.111776	0.43735
chdh	http://dictybase.org/gene/DDB_G0287229	0.087578	0.121756	0.445769
DDB_G0281699	http://dictybase.org/gene/DDB_G0281699	0.087505	0.061876	0.411303
mybG	http://dictybase.org/gene/DDB_G0288783	0.087483	0.101796	0.428249
gbqA	http://dictybase.org/gene/DDB_G0280965	0.087461	0.051896	0.401835
DDB_G0269628	http://dictybase.org/gene/DDB_G0269628	0.087441	0.001996	0.119472
DDB_G0288821	http://dictybase.org/gene/DDB_G0288821	0.087379	0.061876	0.411303
DDB_G0280323	http://dictybase.org/gene/DDB_G0280323	0.087305	0.011976	0.278193
smg1	http://dictybase.org/gene/DDB_G0275845	0.087299	0.021956	0.335971
alrE	http://dictybase.org/gene/DDB_G0285025	0.087255	0.151697	0.466919
DDB_G0293492	http://dictybase.org/gene/DDB_G0293492	0.087178	0.121756	0.445769
lkhA	http://dictybase.org/gene/DDB_G0269148	0.087147	0.081836	0.422442
DDB_G0268064	http://dictybase.org/gene/DDB_G0268064	0.087132	0.101796	0.428249
nek3	http://dictybase.org/gene/DDB_G0275241	0.0871	0.001996	0.119472
DDB_G0276899	http://dictybase.org/gene/DDB_G0276899	0.087097	0.041916	0.385023
ndufs4	http://dictybase.org/gene/DDB_G0295657	0.087055	0.081836	0.422442
DDB_G0288137	http://dictybase.org/gene/DDB_G0288137	0.087008	0.041916	0.385023
asns	http://dictybase.org/gene/DDB_G0286059	0.086982	0.041916	0.385023
DDB_G0278341	http://dictybase.org/gene/DDB_G0278341	0.086977	0.101796	0.428249
erg24	http://dictybase.org/gene/DDB_G0284407	0.086909	0.041916	0.385023
DDB_G0289469	http://dictybase.org/gene/DDB_G0289469	0.086866	0.041916	0.385023
plbB	http://dictybase.org/gene/DDB_G0271126	0.086856	0.081836	0.422442
DDB_G0289063	http://dictybase.org/gene/DDB_G0289063	0.086834	0.121756	0.445769
sgtA	http://dictybase.org/gene/DDB_G0280345	0.086811	0.091816	0.425182
DDB_G0292914	http://dictybase.org/gene/DDB_G0292914	0.086804	0.001996	0.119472
DDB_G0267552	http://dictybase.org/gene/DDB_G0267552	0.086787	0.081836	0.422442
gnb1l	http://dictybase.org/gene/DDB_G0289181	0.086683	0.001996	0.119472
ctbsB	http://dictybase.org/gene/DDB_G0276795	0.08667	0.101796	0.428249
prkab	http://dictybase.org/gene/DDB_G0281089	0.086667	0.011976	0.278193
DDB_G0276925	http://dictybase.org/gene/DDB_G0276925	0.086495	0.091816	0.425182
DDB_G0269664	http://dictybase.org/gene/DDB_G0269664	0.086442	0.091816	0.425182
uduA3	http://dictybase.org/gene/DDB_G0267728	0.086442	0.061876	0.411303
empB	http://dictybase.org/gene/DDB_G0293540	0.086341	0.101796	0.428249
DDB_G0274485	http://dictybase.org/gene/DDB_G0274485	0.086276	0.001996	0.119472
cpiA	http://dictybase.org/gene/DDB_G0291834	0.086255	0.081836	0.422442
DDB_G0279285	http://dictybase.org/gene/DDB_G0279285	0.086193	0.011976	0.278193
commd5	http://dictybase.org/gene/DDB_G0274791	0.086176	0.111776	0.43735
DDB_G0288005	http://dictybase.org/gene/DDB_G0288005	0.086038	0.061876	0.411303
utp6	http://dictybase.org/gene/DDB_G0279601	0.086037	0.081836	0.422442
DDB_G0269232	http://dictybase.org/gene/DDB_G0269232	0.085955	0.001996	0.119472
ubcB	http://dictybase.org/gene/DDB_G0284865	0.085928	0.121756	0.445769
uae1	http://dictybase.org/gene/DDB_G0270272	0.085914	0.111776	0.43735
adk	http://dictybase.org/gene/DDB_G0286057	0.085904	0.061876	0.411303
DDB_G0347658	http://dictybase.org/gene/DDB_G0347658	0.085887	0.071856	0.418802
DDB_G0287517	http://dictybase.org/gene/DDB_G0287517	0.085873	0.101796	0.428249
eIF4e	http://dictybase.org/gene/DDB_G0268574	0.085819	0.071856	0.418802
ksrA-1	http://dictybase.org/gene/DDB_G0272883	0.085808	0.031936	0.361464
irlE	http://dictybase.org/gene/DDB_G0288803	0.085802	0.021956	0.335971
nedd8	http://dictybase.org/gene/DDB_G0278711	0.085786	0.041916	0.385023
mekA	http://dictybase.org/gene/DDB_G0269152	0.085758	0.041916	0.385023
H2Bv1	http://dictybase.org/gene/DDB_G0293758	0.085756	0.061876	0.411303
DDB_G0276205	http://dictybase.org/gene/DDB_G0276205	0.085675	0.111776	0.43735
mcysS	http://dictybase.org/gene/DDB_G0277295	0.085627	0.001996	0.119472
DDB_G0274785	http://dictybase.org/gene/DDB_G0274785	0.085616	0.031936	0.361464
DDB_G0281931	http://dictybase.org/gene/DDB_G0281931	0.085606	0.001996	0.119472
DDB_G0270622	http://dictybase.org/gene/DDB_G0270622	0.08556	0.011976	0.278193
DDB_G0285823	http://dictybase.org/gene/DDB_G0285823	0.085556	0.091816	0.425182
DDB_G0293534	http://dictybase.org/gene/DDB_G0293534	0.085525	0.141717	0.459848
commd4	http://dictybase.org/gene/DDB_G0277089	0.08552	0.101796	0.428249
DDB_G0293038	http://dictybase.org/gene/DDB_G0293038	0.085511	0.001996	0.119472
DDB_G0270438	http://dictybase.org/gene/DDB_G0270438	0.085505	0.081836	0.422442
eif2b1	http://dictybase.org/gene/DDB_G0288961	0.085367	0.051896	0.401835
pkaD	http://dictybase.org/gene/DDB_G0277145	0.085365	0.001996	0.119472
DDB_G0291820	http://dictybase.org/gene/DDB_G0291820	0.085263	0.011976	0.278193
abpA	http://dictybase.org/gene/DDB_G0268632	0.085255	0.101796	0.428249
cbpJ	http://dictybase.org/gene/DDB_G0270210	0.085248	0.001996	0.119472
DDB_G0287257	http://dictybase.org/gene/DDB_G0287257	0.085245	0.071856	0.418802
tkt-1	http://dictybase.org/gene/DDB_G0272618	0.085243	0.081836	0.422442
gnpda1	http://dictybase.org/gene/DDB_G0278873	0.085223	0.091816	0.425182
DDB_G0293312	http://dictybase.org/gene/DDB_G0293312	0.085211	0.001996	0.119472
cbpP	http://dictybase.org/gene/DDB_G0277909	0.085211	0.051896	0.401835
eif2b2	http://dictybase.org/gene/DDB_G0291271	0.085158	0.041916	0.385023
DDB_G0270212	http://dictybase.org/gene/DDB_G0270212	0.085059	0.111776	0.43735
ndufs7	http://dictybase.org/gene/DDB_G0285239	0.085045	0.071856	0.418802
DDB_G0284931	http://dictybase.org/gene/DDB_G0284931	0.085036	0.001996	0.119472
arrC	http://dictybase.org/gene/DDB_G0271792	0.085001	0.031936	0.361464
ileS	http://dictybase.org/gene/DDB_G0278293	0.08491	0.031936	0.361464
pakF	http://dictybase.org/gene/DDB_G0274409	0.084848	0.011976	0.278193
DDB_G0291574	http://dictybase.org/gene/DDB_G0291574	0.084838	0.111776	0.43735
DDB_G0293724	http://dictybase.org/gene/DDB_G0293724	0.084782	0.081836	0.422442
capA-1	http://dictybase.org/gene/DDB_G0272560	0.084777	0.041916	0.385023
DDB_G0270192	http://dictybase.org/gene/DDB_G0270192	0.084772	0.111776	0.43735
uduC	http://dictybase.org/gene/DDB_G0270726	0.084753	0.021956	0.335971
DDB_G0292882	http://dictybase.org/gene/DDB_G0292882	0.084665	0.021956	0.335971
ube2m	http://dictybase.org/gene/DDB_G0281725	0.084638	0.021956	0.335971
tgrR1	http://dictybase.org/gene/DDB_G0275745	0.084608	0.011976	0.278193
DDB_G0280185	http://dictybase.org/gene/DDB_G0280185	0.0846	0.121756	0.445769
adcA	http://dictybase.org/gene/DDB_G0292924	0.084593	0.051896	0.401835
copB	http://dictybase.org/gene/DDB_G0284735	0.084589	0.101796	0.428249
comC	http://dictybase.org/gene/DDB_G0271692	0.084582	0.001996	0.119472
vps5	http://dictybase.org/gene/DDB_G0272989	0.084565	0.051896	0.401835
DDB_G0278665	http://dictybase.org/gene/DDB_G0278665	0.084562	0.021956	0.335971
eif2s1	http://dictybase.org/gene/DDB_G0271862	0.084422	0.091816	0.425182
prafB	http://dictybase.org/gene/DDB_G0285007	0.084378	0.111776	0.43735
pctA	http://dictybase.org/gene/DDB_G0270298	0.084372	0.061876	0.411303
mrps19	http://dictybase.org/gene/DDB_G0294044	0.084333	0.031936	0.361464
mrps2	http://dictybase.org/gene/DDB_G0294050	0.084307	0.041916	0.385023
DDB_G0289053	http://dictybase.org/gene/DDB_G0289053	0.0843	0.101796	0.428249
abcA9	http://dictybase.org/gene/DDB_G0291980	0.084204	0.141717	0.459848
uprt	http://dictybase.org/gene/DDB_G0267560	0.084187	0.071856	0.418802
cpnE	http://dictybase.org/gene/DDB_G0290529	0.084164	0.011976	0.278193
mobA	http://dictybase.org/gene/DDB_G0278907	0.084088	0.121756	0.445769
cfrC	http://dictybase.org/gene/DDB_G0290261	0.084066	0.091816	0.425182
arpB	http://dictybase.org/gene/DDB_G0272106	0.084047	0.101796	0.428249
drpp30	http://dictybase.org/gene/DDB_G0269980	0.084039	0.031936	0.361464
pho2a	http://dictybase.org/gene/DDB_G0290263	0.083963	0.031936	0.361464
DDB_G0277159	http://dictybase.org/gene/DDB_G0277159	0.083958	0.001996	0.119472
DDB_G0270030	http://dictybase.org/gene/DDB_G0270030	0.083904	0.011976	0.278193
mmetS	http://dictybase.org/gene/DDB_G0285759	0.083879	0.031936	0.361464
ap2a1-1	http://dictybase.org/gene/DDB_G0273439	0.083868	0.091816	0.425182
psmD2	http://dictybase.org/gene/DDB_G0293752	0.083814	0.101796	0.428249
efaAI	http://dictybase.org/gene/DDB_G0269134	0.083803	0.001996	0.119472
DDB_G0279277	http://dictybase.org/gene/DDB_G0279277	0.08379	0.111776	0.43735
cyp518A1	http://dictybase.org/gene/DDB_G0277545	0.083786	0.111776	0.43735
cdk7	http://dictybase.org/gene/DDB_G0285417	0.083757	0.061876	0.411303
derl2	http://dictybase.org/gene/DDB_G0285131	0.083745	0.071856	0.418802
mcfZ	http://dictybase.org/gene/DDB_G0293874	0.083702	0.101796	0.428249
fscG	http://dictybase.org/gene/DDB_G0292156	0.083691	0.031936	0.361464
shkA	http://dictybase.org/gene/DDB_G0283267	0.083675	0.161677	0.472439
DDB_G0283523	http://dictybase.org/gene/DDB_G0283523	0.083674	0.011976	0.278193
grp94	http://dictybase.org/gene/DDB_G0280057	0.083666	0.071856	0.418802
lmcB	http://dictybase.org/gene/DDB_G0280533	0.083603	0.061876	0.411303
mrpl51	http://dictybase.org/gene/DDB_G0283273	0.083567	0.081836	0.422442
syn10	http://dictybase.org/gene/DDB_G0284385	0.083451	0.131737	0.452811
DDB_G0271238	http://dictybase.org/gene/DDB_G0271238	0.083438	0.011976	0.278193
DDB_G0278455	http://dictybase.org/gene/DDB_G0278455	0.083399	0.011976	0.278193
ndufa6	http://dictybase.org/gene/DDB_G0291129	0.083393	0.091816	0.425182
aplM	http://dictybase.org/gene/DDB_G0291113	0.083304	0.101796	0.428249
erh	http://dictybase.org/gene/DDB_G0274565	0.083268	0.061876	0.411303
ube1c	http://dictybase.org/gene/DDB_G0283891	0.083249	0.061876	0.411303
rab18	http://dictybase.org/gene/DDB_G0289827	0.083233	0.101796	0.428249
rheb	http://dictybase.org/gene/DDB_G0277041	0.083225	0.151697	0.466919
tmem167	http://dictybase.org/gene/DDB_G0289451	0.083219	0.111776	0.43735
nap1	http://dictybase.org/gene/DDB_G0269290	0.083218	0.061876	0.411303
DDB_G0267848	http://dictybase.org/gene/DDB_G0267848	0.083209	0.051896	0.401835
DDB_G0279485	http://dictybase.org/gene/DDB_G0279485	0.083198	0.101796	0.428249
DDB_G0268478	http://dictybase.org/gene/DDB_G0268478	0.08319	0.101796	0.428249
DDB_G0290575	http://dictybase.org/gene/DDB_G0290575	0.083095	0.091816	0.425182
DDB_G0288143	http://dictybase.org/gene/DDB_G0288143	0.083049	0.011976	0.278193
DDB_G0272801	http://dictybase.org/gene/DDB_G0272801	0.082964	0.051896	0.401835
sodC	http://dictybase.org/gene/DDB_G0282993	0.082962	0.121756	0.445769
DDB_G0287075	http://dictybase.org/gene/DDB_G0287075	0.082925	0.001996	0.119472
DDB_G0277179	http://dictybase.org/gene/DDB_G0277179	0.082846	0.031936	0.361464
DDB_G0285357	http://dictybase.org/gene/DDB_G0285357	0.082826	0.081836	0.422442
DDB_G0277495	http://dictybase.org/gene/DDB_G0277495	0.082782	0.031936	0.361464
mrps14	http://dictybase.org/gene/DDB_G0294062	0.082719	0.051896	0.401835
proB	http://dictybase.org/gene/DDB_G0286187	0.08265	0.111776	0.43735
oplah	http://dictybase.org/gene/DDB_G0284953	0.082646	0.041916	0.385023
srp14-2	http://dictybase.org/gene/DDB_G0273977	0.082633	0.011976	0.278193
2015-09-15	http://dictybase.org/gene/DDB_G0268396	0.082632	0.121756	0.445769
pwp2	http://dictybase.org/gene/DDB_G0284621	0.082622	0.001996	0.119472
DDB_G0268206	http://dictybase.org/gene/DDB_G0268206	0.082621	0.081836	0.422442
DDB_G0282573	http://dictybase.org/gene/DDB_G0282573	0.082606	0.001996	0.119472
selD	http://dictybase.org/gene/DDB_G0282367	0.082586	0.061876	0.411303
drpp20	http://dictybase.org/gene/DDB_G0289139	0.082554	0.021956	0.335971
DDB_G0287825	http://dictybase.org/gene/DDB_G0287825	0.082485	0.111776	0.43735
DDB_G0270444	http://dictybase.org/gene/DDB_G0270444	0.082439	0.001996	0.119472
sec24	http://dictybase.org/gene/DDB_G0281255	0.082426	0.091816	0.425182
DDB_G0272740	http://dictybase.org/gene/DDB_G0272740	0.082402	0.091816	0.425182
DDB_G0279145	http://dictybase.org/gene/DDB_G0279145	0.082303	0.061876	0.411303
DDB_G0286197	http://dictybase.org/gene/DDB_G0286197	0.082302	0.061876	0.411303
DDB_G0286167	http://dictybase.org/gene/DDB_G0286167	0.082289	0.101796	0.428249
DDB_G0293234	http://dictybase.org/gene/DDB_G0293234	0.082272	0.061876	0.411303
DDB_G0285603	http://dictybase.org/gene/DDB_G0285603	0.082173	0.081836	0.422442
DDB_G0275693	http://dictybase.org/gene/DDB_G0275693	0.082161	0.041916	0.385023
DDB_G0291029	http://dictybase.org/gene/DDB_G0291029	0.082147	0.091816	0.425182
ncstn	http://dictybase.org/gene/DDB_G0287801	0.082132	0.111776	0.43735
syn8B	http://dictybase.org/gene/DDB_G0288439	0.08209	0.181637	0.485157
rab32D	http://dictybase.org/gene/DDB_G0285051	0.082081	0.151697	0.466919
cas1	http://dictybase.org/gene/DDB_G0269226	0.082039	0.051896	0.401835
rasS	http://dictybase.org/gene/DDB_G0283537	0.082038	0.111776	0.43735
mrps7	http://dictybase.org/gene/DDB_G0294072	0.082014	0.001996	0.119472
DDB_G0275853	http://dictybase.org/gene/DDB_G0275853	0.082007	0.041916	0.385023
DDB_G0291966	http://dictybase.org/gene/DDB_G0291966	0.082003	0.111776	0.43735
DDB_G0293204	http://dictybase.org/gene/DDB_G0293204	0.081964	0.081836	0.422442
DDB_G0278541	http://dictybase.org/gene/DDB_G0278541	0.081962	0.081836	0.422442
DDB_G0287749	http://dictybase.org/gene/DDB_G0287749	0.081936	0.081836	0.422442
acp1	http://dictybase.org/gene/DDB_G0267484	0.081916	0.031936	0.361464
DDB_G0277165	http://dictybase.org/gene/DDB_G0277165	0.081915	0.031936	0.361464
DDB_G0278569	http://dictybase.org/gene/DDB_G0278569	0.081855	0.111776	0.43735
vacA	http://dictybase.org/gene/DDB_G0289485	0.081849	0.111776	0.43735
psmC5	http://dictybase.org/gene/DDB_G0292382	0.081836	0.091816	0.425182
cct3	http://dictybase.org/gene/DDB_G0281741	0.081822	0.061876	0.411303
DDB_G0295773	http://dictybase.org/gene/DDB_G0295773	0.081811	0.091816	0.425182
psmC6	http://dictybase.org/gene/DDB_G0284517	0.081768	0.091816	0.425182
DDB_G0275259	http://dictybase.org/gene/DDB_G0275259	0.081674	0.011976	0.278193
DDB_G0287403	http://dictybase.org/gene/DDB_G0287403	0.081637	0.111776	0.43735
vwkA	http://dictybase.org/gene/DDB_G0268144	0.081585	0.051896	0.401835
DDB_G0287741	http://dictybase.org/gene/DDB_G0287741	0.08145	0.131737	0.452811
lsm2	http://dictybase.org/gene/DDB_G0281779	0.081432	0.021956	0.335971
DDB_G0289127	http://dictybase.org/gene/DDB_G0289127	0.081305	0.101796	0.428249
mrpl34	http://dictybase.org/gene/DDB_G0295825	0.08129	0.021956	0.335971
pprA	http://dictybase.org/gene/DDB_G0284039	0.081267	0.041916	0.385023
cog5	http://dictybase.org/gene/DDB_G0289535	0.081177	0.011976	0.278193
DDB_G0274203	http://dictybase.org/gene/DDB_G0274203	0.081159	0.001996	0.119472
DDB_G0272192	http://dictybase.org/gene/DDB_G0272192	0.081151	0.131737	0.452811
thrS1	http://dictybase.org/gene/DDB_G0288267	0.081148	0.081836	0.422442
DDB_G0267984	http://dictybase.org/gene/DDB_G0267984	0.081117	0.101796	0.428249
gpmA	http://dictybase.org/gene/DDB_G0285311	0.081111	0.101796	0.428249
DDB_G0281363	http://dictybase.org/gene/DDB_G0281363	0.081075	0.001996	0.119472
DDB_G0291414	http://dictybase.org/gene/DDB_G0291414	0.080999	0.111776	0.43735
pgkA	http://dictybase.org/gene/DDB_G0287595	0.080982	0.091816	0.425182
mlcR	http://dictybase.org/gene/DDB_G0276077	0.080952	0.131737	0.452811
vatG	http://dictybase.org/gene/DDB_G0277971	0.08095	0.091816	0.425182
nmd3	http://dictybase.org/gene/DDB_G0271306	0.080929	0.011976	0.278193
aplB	http://dictybase.org/gene/DDB_G0286651	0.08092	0.081836	0.422442
DDB_G0292680	http://dictybase.org/gene/DDB_G0292680	0.080893	0.081836	0.422442
mrpl13	http://dictybase.org/gene/DDB_G0274959	0.080892	0.051896	0.401835
DDB_G0289707	http://dictybase.org/gene/DDB_G0289707	0.080863	0.181637	0.485157
DDB_G0285525	http://dictybase.org/gene/DDB_G0285525	0.080837	0.021956	0.335971
romo1	http://dictybase.org/gene/DDB_G0286181	0.080832	0.081836	0.422442
cenB	http://dictybase.org/gene/DDB_G0279151	0.080827	0.151697	0.466919
DDB_G0278295	http://dictybase.org/gene/DDB_G0278295	0.080826	0.111776	0.43735
zak2	http://dictybase.org/gene/DDB_G0276187	0.080824	0.021956	0.335971
DDB_G0290433	http://dictybase.org/gene/DDB_G0290433	0.080771	0.091816	0.425182
DDB_G0272726	http://dictybase.org/gene/DDB_G0272726	0.080763	0.061876	0.411303
DDB_G0273771	http://dictybase.org/gene/DDB_G0273771	0.080762	0.021956	0.335971
itfg1	http://dictybase.org/gene/DDB_G0292418	0.080721	0.131737	0.452811
adrm1-1	http://dictybase.org/gene/DDB_G0272624	0.080698	0.081836	0.422442
DDB_G0275075	http://dictybase.org/gene/DDB_G0275075	0.080671	0.081836	0.422442
DDB_G0283011	http://dictybase.org/gene/DDB_G0283011	0.080661	0.101796	0.428249
DDB_G0295779	http://dictybase.org/gene/DDB_G0295779	0.080647	0.011976	0.278193
DDB_G0282301	http://dictybase.org/gene/DDB_G0282301	0.080629	0.001996	0.119472
vps32	http://dictybase.org/gene/DDB_G0275573	0.080565	0.141717	0.459848
wdr61	http://dictybase.org/gene/DDB_G0282793	0.08055	0.001996	0.119472
DDB_G0274781	http://dictybase.org/gene/DDB_G0274781	0.08052	0.141717	0.459848
DDB_G0281465	http://dictybase.org/gene/DDB_G0281465	0.080485	0.121756	0.445769
snrpA1	http://dictybase.org/gene/DDB_G0284101	0.080481	0.121756	0.445769
glk	http://dictybase.org/gene/DDB_G0287631	0.080461	0.051896	0.401835
ufd1	http://dictybase.org/gene/DDB_G0271122	0.080436	0.121756	0.445769
DDB_G0293800	http://dictybase.org/gene/DDB_G0293800	0.080282	0.121756	0.445769
ndufv2	http://dictybase.org/gene/DDB_G0291173	0.080213	0.081836	0.422442
DDB_G0280165	http://dictybase.org/gene/DDB_G0280165	0.080185	0.001996	0.119472
mrps8	http://dictybase.org/gene/DDB_G0294060	0.080064	0.041916	0.385023
DDB_G0282337	http://dictybase.org/gene/DDB_G0282337	0.080053	0.111776	0.43735
DDB_G0277211	http://dictybase.org/gene/DDB_G0277211	0.080052	0.001996	0.119472
cprG	http://dictybase.org/gene/DDB_G0279187	0.080017	0.061876	0.411303
aplH	http://dictybase.org/gene/DDB_G0282153	0.079994	0.111776	0.43735
DDB_G0279137	http://dictybase.org/gene/DDB_G0279137	0.07999	0.081836	0.422442
DDB_G0272592	http://dictybase.org/gene/DDB_G0272592	0.079988	0.111776	0.43735
gmkA	http://dictybase.org/gene/DDB_G0279001	0.079973	0.081836	0.422442
DDB_G0290655	http://dictybase.org/gene/DDB_G0290655	0.07986	0.101796	0.428249
DDB_G0272012	http://dictybase.org/gene/DDB_G0272012	0.07982	0.101796	0.428249
DDB_G0275911	http://dictybase.org/gene/DDB_G0275911	0.079794	0.061876	0.411303
cepG	http://dictybase.org/gene/DDB_G0278809	0.07979	0.121756	0.445769
psenB	http://dictybase.org/gene/DDB_G0292310	0.079705	0.081836	0.422442
vatF	http://dictybase.org/gene/DDB_G0271882	0.079673	0.071856	0.418802
DDB_G0281745	http://dictybase.org/gene/DDB_G0281745	0.079624	0.001996	0.119472
nup98	http://dictybase.org/gene/DDB_G0291390	0.079558	0.061876	0.411303
erg2	http://dictybase.org/gene/DDB_G0270356	0.079533	0.081836	0.422442
nutf2	http://dictybase.org/gene/DDB_G0276425	0.079467	0.091816	0.425182
abcE1	http://dictybase.org/gene/DDB_G0290483	0.079427	0.011976	0.278193
DDB_G0270022	http://dictybase.org/gene/DDB_G0270022	0.079405	0.071856	0.418802
shmt1	http://dictybase.org/gene/DDB_G0277947	0.079405	0.101796	0.428249
DDB_G0277729	http://dictybase.org/gene/DDB_G0277729	0.079379	0.141717	0.459848
ndufv1	http://dictybase.org/gene/DDB_G0288875	0.079371	0.091816	0.425182
DDB_G0272224	http://dictybase.org/gene/DDB_G0272224	0.079315	0.011976	0.278193
pdkA	http://dictybase.org/gene/DDB_G0281471	0.079304	0.051896	0.401835
cyc1	http://dictybase.org/gene/DDB_G0292594	0.07918	0.081836	0.422442
pigL	http://dictybase.org/gene/DDB_G0293136	0.079077	0.031936	0.361464
catA	http://dictybase.org/gene/DDB_G0274595	0.078984	0.071856	0.418802
DDB_G0286581	http://dictybase.org/gene/DDB_G0286581	0.078935	0.151697	0.466919
DDB_G0272614	http://dictybase.org/gene/DDB_G0272614	0.078918	0.051896	0.401835
samkD	http://dictybase.org/gene/DDB_G0270680	0.07891	0.041916	0.385023
rpb5	http://dictybase.org/gene/DDB_G0291636	0.078845	0.091816	0.425182
nubpl	http://dictybase.org/gene/DDB_G0291193	0.078838	0.041916	0.385023
pyrK	http://dictybase.org/gene/DDB_G0287495	0.078815	0.011976	0.278193
DDB_G0271726	http://dictybase.org/gene/DDB_G0271726	0.078809	0.041916	0.385023
plbF	http://dictybase.org/gene/DDB_G0275125	0.078794	0.091816	0.425182
rpb11	http://dictybase.org/gene/DDB_G0277677	0.078728	0.121756	0.445769
DDB_G0291344	http://dictybase.org/gene/DDB_G0291344	0.078688	0.171657	0.479499
DDB_G0285021	http://dictybase.org/gene/DDB_G0285021	0.078666	0.091816	0.425182
arcD	http://dictybase.org/gene/DDB_G0269102	0.078661	0.131737	0.452811
DDB_G0287509	http://dictybase.org/gene/DDB_G0287509	0.078636	0.121756	0.445769
DDB_G0284917	http://dictybase.org/gene/DDB_G0284917	0.078626	0.081836	0.422442
DDB_G0283823	http://dictybase.org/gene/DDB_G0283823	0.078592	0.091816	0.425182
DDB_G0271878	http://dictybase.org/gene/DDB_G0271878	0.078569	0.001996	0.119472
DDB_G0277941	http://dictybase.org/gene/DDB_G0277941	0.078565	0.001996	0.119472
alg6	http://dictybase.org/gene/DDB_G0283841	0.078422	0.021956	0.335971
DDB_G0268816	http://dictybase.org/gene/DDB_G0268816	0.078399	0.121756	0.445769
DDB_G0293126	http://dictybase.org/gene/DDB_G0293126	0.078389	0.071856	0.418802
atox1	http://dictybase.org/gene/DDB_G0284221	0.078346	0.121756	0.445769
DDB_G0295725	http://dictybase.org/gene/DDB_G0295725	0.078339	0.011976	0.278193
rabK1	http://dictybase.org/gene/DDB_G0290833	0.078333	0.011976	0.278193
gatC	http://dictybase.org/gene/DDB_G0284291	0.078308	0.011976	0.278193
mrpl22	http://dictybase.org/gene/DDB_G0279519	0.078307	0.031936	0.361464
DDB_G0268130	http://dictybase.org/gene/DDB_G0268130	0.078295	0.111776	0.43735
sec23	http://dictybase.org/gene/DDB_G0281985	0.078255	0.091816	0.425182
lsm7	http://dictybase.org/gene/DDB_G0289499	0.078254	0.011976	0.278193
DDB_G0274897	http://dictybase.org/gene/DDB_G0274897	0.078251	0.121756	0.445769
DDB_G0284037	http://dictybase.org/gene/DDB_G0284037	0.078221	0.101796	0.428249
DDB_G0293674	http://dictybase.org/gene/DDB_G0293674	0.078194	0.011976	0.278193
DDB_G0267530	http://dictybase.org/gene/DDB_G0267530	0.078191	0.011976	0.278193
cog4	http://dictybase.org/gene/DDB_G0267960	0.07817	0.031936	0.361464
nup133	http://dictybase.org/gene/DDB_G0287497	0.078169	0.111776	0.43735
psmA4	http://dictybase.org/gene/DDB_G0280969	0.078111	0.101796	0.428249
mrpl33	http://dictybase.org/gene/DDB_G0278023	0.078089	0.081836	0.422442
hao	http://dictybase.org/gene/DDB_G0291814	0.078068	0.141717	0.459848
DDB_G0287847	http://dictybase.org/gene/DDB_G0287847	0.078055	0.031936	0.361464
snrp70	http://dictybase.org/gene/DDB_G0268004	0.077963	0.001996	0.119472
mgm101	http://dictybase.org/gene/DDB_G0277451	0.077955	0.101796	0.428249
DDB_G0286239	http://dictybase.org/gene/DDB_G0286239	0.077942	0.001996	0.119472
DDB_G0282237	http://dictybase.org/gene/DDB_G0282237	0.077917	0.121756	0.445769
DDB_G0270368	http://dictybase.org/gene/DDB_G0270368	0.077917	0.041916	0.385023
ddj1	http://dictybase.org/gene/DDB_G0280037	0.07785	0.071856	0.418802
DDB_G0277335	http://dictybase.org/gene/DDB_G0277335	0.077848	0.001996	0.119472
DDB_G0271546	http://dictybase.org/gene/DDB_G0271546	0.077843	0.171657	0.479499
DDB_G0291644	http://dictybase.org/gene/DDB_G0291644	0.077836	0.021956	0.335971
DDB_G0277205	http://dictybase.org/gene/DDB_G0277205	0.0778	0.101796	0.428249
png	http://dictybase.org/gene/DDB_G0268168	0.077795	0.071856	0.418802
med18	http://dictybase.org/gene/DDB_G0285713	0.077787	0.001996	0.119472
tgrI2	http://dictybase.org/gene/DDB_G0283317	0.077762	0.031936	0.361464
DDB_G0276779	http://dictybase.org/gene/DDB_G0276779	0.07775	0.181637	0.485157
DDB_G0273041	http://dictybase.org/gene/DDB_G0273041	0.077747	0.011976	0.278193
metS	http://dictybase.org/gene/DDB_G0279113	0.077742	0.011976	0.278193
odhB	http://dictybase.org/gene/DDB_G0275029	0.077735	0.061876	0.411303
rpb10	http://dictybase.org/gene/DDB_G0272036	0.077734	0.101796	0.428249
sonA	http://dictybase.org/gene/DDB_G0267452	0.077725	0.011976	0.278193
DDB_G0275673	http://dictybase.org/gene/DDB_G0275673	0.077725	0.101796	0.428249
DDB_G0280825	http://dictybase.org/gene/DDB_G0280825	0.077722	0.081836	0.422442
DDB_G0280799	http://dictybase.org/gene/DDB_G0280799	0.077694	0.011976	0.278193
DDB_G0295793	http://dictybase.org/gene/DDB_G0295793	0.07769	0.011976	0.278193
DDB_G0271220	http://dictybase.org/gene/DDB_G0271220	0.077636	0.001996	0.119472
zipA	http://dictybase.org/gene/DDB_G0286985	0.077627	0.101796	0.428249
DDB_G0293548	http://dictybase.org/gene/DDB_G0293548	0.077623	0.021956	0.335971
adprt2	http://dictybase.org/gene/DDB_G0292820	0.077621	0.001996	0.119472
udkA	http://dictybase.org/gene/DDB_G0269034	0.077601	0.031936	0.361464
fttB	http://dictybase.org/gene/DDB_G0269138	0.077487	0.111776	0.43735
DDB_G0272965	http://dictybase.org/gene/DDB_G0272965	0.07741	0.071856	0.418802
spkA-1	http://dictybase.org/gene/DDB_G0273445	0.077354	0.161677	0.472439
DDB_G0288019	http://dictybase.org/gene/DDB_G0288019	0.077343	0.151697	0.466919
dhak	http://dictybase.org/gene/DDB_G0269274	0.077342	0.021956	0.335971
thyB	http://dictybase.org/gene/DDB_G0289179	0.077328	0.021956	0.335971
cyp508A2-1	http://dictybase.org/gene/DDB_G0272604	0.077322	0.101796	0.428249
prdx4	http://dictybase.org/gene/DDB_G0274859	0.077297	0.071856	0.418802
DDB_G0291015	http://dictybase.org/gene/DDB_G0291015	0.077278	0.011976	0.278193
pakH-1	http://dictybase.org/gene/DDB_G0273121	0.077246	0.051896	0.401835
rbsk	http://dictybase.org/gene/DDB_G0280893	0.077178	0.021956	0.335971
DDB_G0267734	http://dictybase.org/gene/DDB_G0267734	0.07714	0.091816	0.425182
DDB_G0278597	http://dictybase.org/gene/DDB_G0278597	0.077089	0.091816	0.425182
rpc9	http://dictybase.org/gene/DDB_G0286521	0.077085	0.011976	0.278193
mapbpip	http://dictybase.org/gene/DDB_G0291091	0.077051	0.171657	0.479499
uduA1	http://dictybase.org/gene/DDB_G0268332	0.076989	0.061876	0.411303
DDB_G0289059	http://dictybase.org/gene/DDB_G0289059	0.076953	0.111776	0.43735
DDB_G0278493	http://dictybase.org/gene/DDB_G0278493	0.076898	0.001996	0.119472
fumH	http://dictybase.org/gene/DDB_G0280495	0.076873	0.101796	0.428249
DDB_G0291324	http://dictybase.org/gene/DDB_G0291324	0.076844	0.131737	0.452811
DDB_G0291670	http://dictybase.org/gene/DDB_G0291670	0.076791	0.001996	0.119472
vps4	http://dictybase.org/gene/DDB_G0284347	0.076764	0.061876	0.411303
DDB_G0278819	http://dictybase.org/gene/DDB_G0278819	0.076756	0.131737	0.452811
netD	http://dictybase.org/gene/DDB_G0278115	0.07675	0.061876	0.411303
sadA	http://dictybase.org/gene/DDB_G0288511	0.076732	0.131737	0.452811
pemtA	http://dictybase.org/gene/DDB_G0282527	0.076688	0.101796	0.428249
abpF	http://dictybase.org/gene/DDB_G0291229	0.076668	0.101796	0.428249
pdi1	http://dictybase.org/gene/DDB_G0276141	0.076634	0.071856	0.418802
DDB_G0288971	http://dictybase.org/gene/DDB_G0288971	0.076561	0.011976	0.278193
DDB_G0267508	http://dictybase.org/gene/DDB_G0267508	0.076524	0.031936	0.361464
DDB_G0267796	http://dictybase.org/gene/DDB_G0267796	0.076469	0.131737	0.452811
DDB_G0271672	http://dictybase.org/gene/DDB_G0271672	0.076465	0.001996	0.119472
DDB_G0270690	http://dictybase.org/gene/DDB_G0270690	0.076406	0.081836	0.422442
mobB	http://dictybase.org/gene/DDB_G0292758	0.07637	0.111776	0.43735
mrpl17	http://dictybase.org/gene/DDB_G0281435	0.076312	0.051896	0.401835
DDB_G0269788	http://dictybase.org/gene/DDB_G0269788	0.076309	0.001996	0.119472
pif1	http://dictybase.org/gene/DDB_G0277925	0.076285	0.031936	0.361464
DDB_G0290197	http://dictybase.org/gene/DDB_G0290197	0.07626	0.111776	0.43735
fhkC	http://dictybase.org/gene/DDB_G0281567	0.076197	0.041916	0.385023
etnkB	http://dictybase.org/gene/DDB_G0275265	0.076183	0.031936	0.361464
DDB_G0281601	http://dictybase.org/gene/DDB_G0281601	0.076142	0.091816	0.425182
DDB_G0269334	http://dictybase.org/gene/DDB_G0269334	0.076129	0.091816	0.425182
ldhA	http://dictybase.org/gene/DDB_G0281101	0.076124	0.131737	0.452811
DDB_G0293380	http://dictybase.org/gene/DDB_G0293380	0.076091	0.001996	0.119472
rabJ	http://dictybase.org/gene/DDB_G0277441	0.07609	0.121756	0.445769
cfrA	http://dictybase.org/gene/DDB_G0290257	0.076061	0.121756	0.445769
DDB_G0280289	http://dictybase.org/gene/DDB_G0280289	0.076051	0.011976	0.278193
DDB_G0268008	http://dictybase.org/gene/DDB_G0268008	0.076046	0.071856	0.418802
DDB_G0290387	http://dictybase.org/gene/DDB_G0290387	0.076034	0.121756	0.445769
racN	http://dictybase.org/gene/DDB_G0278009	0.076027	0.071856	0.418802
uch2	http://dictybase.org/gene/DDB_G0285527	0.076017	0.031936	0.361464
cyb5A	http://dictybase.org/gene/DDB_G0276033	0.075997	0.101796	0.428249
DDB_G0289131	http://dictybase.org/gene/DDB_G0289131	0.075885	0.011976	0.278193
DDB_G0270450	http://dictybase.org/gene/DDB_G0270450	0.075819	0.011976	0.278193
DDB_G0289081	http://dictybase.org/gene/DDB_G0289081	0.075818	0.061876	0.411303
DG2033	http://dictybase.org/gene/DDB_G0278965	0.075767	0.001996	0.119472
gpaG	http://dictybase.org/gene/DDB_G0276455	0.075725	0.201597	0.498339
pyk	http://dictybase.org/gene/DDB_G0283247	0.075722	0.051896	0.401835
DDB_G0268498	http://dictybase.org/gene/DDB_G0268498	0.075685	0.081836	0.422442
DDB_G0273795	http://dictybase.org/gene/DDB_G0273795	0.075685	0.011976	0.278193
DDB_G0289265	http://dictybase.org/gene/DDB_G0289265	0.07568	0.121756	0.445769
cad2	http://dictybase.org/gene/DDB_G0275439	0.075605	0.031936	0.361464
dcd2A	http://dictybase.org/gene/DDB_G0293538	0.075603	0.061876	0.411303
DDB_G0291394	http://dictybase.org/gene/DDB_G0291394	0.075561	0.131737	0.452811
cdk11	http://dictybase.org/gene/DDB_G0283279	0.075541	0.001996	0.119472
mvd	http://dictybase.org/gene/DDB_G0278607	0.075507	0.051896	0.401835
ctxA	http://dictybase.org/gene/DDB_G0289483	0.075493	0.141717	0.459848
DDB_G0286641	http://dictybase.org/gene/DDB_G0286641	0.075478	0.011976	0.278193
fscF	http://dictybase.org/gene/DDB_G0292064	0.075462	0.031936	0.361464
DDB_G0284671	http://dictybase.org/gene/DDB_G0284671	0.075408	0.021956	0.335971
argD	http://dictybase.org/gene/DDB_G0269526	0.075361	0.201597	0.498339
DDB_G0274969	http://dictybase.org/gene/DDB_G0274969	0.075326	0.151697	0.466919
DDB_G0278793	http://dictybase.org/gene/DDB_G0278793	0.075321	0.131737	0.452811
DDB_G0347202	http://dictybase.org/gene/DDB_G0347202	0.075319	0.051896	0.401835
DDB_G0288865	http://dictybase.org/gene/DDB_G0288865	0.075291	0.001996	0.119472
DDB_G0279695	http://dictybase.org/gene/DDB_G0279695	0.075291	0.111776	0.43735
eftud2	http://dictybase.org/gene/DDB_G0283359	0.075252	0.081836	0.422442
ctsD	http://dictybase.org/gene/DDB_G0279411	0.075204	0.091816	0.425182
DDB_G0284485	http://dictybase.org/gene/DDB_G0284485	0.07519	0.111776	0.43735
DDB_G0287967	http://dictybase.org/gene/DDB_G0287967	0.075153	0.011976	0.278193
DDB_G0286897	http://dictybase.org/gene/DDB_G0286897	0.07515	0.041916	0.385023
DDB_G0289947	http://dictybase.org/gene/DDB_G0289947	0.075119	0.101796	0.428249
DDB_G0293640	http://dictybase.org/gene/DDB_G0293640	0.075116	0.061876	0.411303
DDB_G0272238	http://dictybase.org/gene/DDB_G0272238	0.075091	0.011976	0.278193
fnkC	http://dictybase.org/gene/DDB_G0276349	0.075085	0.021956	0.335971
DDB_G0294631	http://dictybase.org/gene/DDB_G0294631	0.075054	0.031936	0.361464
eIF5	http://dictybase.org/gene/DDB_G0286753	0.075014	0.031936	0.361464
p2xA	http://dictybase.org/gene/DDB_G0272004	0.075005	0.101796	0.428249
manB	http://dictybase.org/gene/DDB_G0278259	0.07499	0.101796	0.428249
H2Av2	http://dictybase.org/gene/DDB_G0289193	0.074988	0.011976	0.278193
gabT	http://dictybase.org/gene/DDB_G0268104	0.074961	0.081836	0.422442
psmC4	http://dictybase.org/gene/DDB_G0289003	0.074911	0.101796	0.428249
ola1	http://dictybase.org/gene/DDB_G0268758	0.074899	0.101796	0.428249
DDB_G0270976_ps	http://dictybase.org/gene/DDB_G0270976	0.074862	0.001996	0.119472
abcA3	http://dictybase.org/gene/DDB_G0293436	0.074843	0.101796	0.428249
apm3	http://dictybase.org/gene/DDB_G0277901	0.074832	0.061876	0.411303
proA	http://dictybase.org/gene/DDB_G0287125	0.074823	0.111776	0.43735
abcC2	http://dictybase.org/gene/DDB_G0280055	0.074776	0.121756	0.445769
ppa1	http://dictybase.org/gene/DDB_G0284265	0.074746	0.141717	0.459848
DDB_G0276927	http://dictybase.org/gene/DDB_G0276927	0.074736	0.111776	0.43735
p2xD	http://dictybase.org/gene/DDB_G0288335	0.074696	0.021956	0.335971
ints2	http://dictybase.org/gene/DDB_G0271040	0.074684	0.101796	0.428249
DDB_G0287015	http://dictybase.org/gene/DDB_G0287015	0.074683	0.021956	0.335971
bloc1s5	http://dictybase.org/gene/DDB_G0281859	0.074665	0.011976	0.278193
cupD	http://dictybase.org/gene/DDB_G0293536	0.074608	0.071856	0.418802
DDB_G0286079	http://dictybase.org/gene/DDB_G0286079	0.074579	0.111776	0.43735
DDB_G0287153	http://dictybase.org/gene/DDB_G0287153	0.074573	0.031936	0.361464
DDB_G0271894	http://dictybase.org/gene/DDB_G0271894	0.074558	0.111776	0.43735
srsA	http://dictybase.org/gene/DDB_G0289521	0.07454	0.011976	0.278193
DDB_G0279611	http://dictybase.org/gene/DDB_G0279611	0.074523	0.081836	0.422442
DDB_G0284757	http://dictybase.org/gene/DDB_G0284757	0.074488	0.121756	0.445769
DDB_G0284259	http://dictybase.org/gene/DDB_G0284259	0.074457	0.091816	0.425182
DDB_G0267824	http://dictybase.org/gene/DDB_G0267824	0.074401	0.001996	0.119472
DDB_G0293606	http://dictybase.org/gene/DDB_G0293606	0.074387	0.021956	0.335971
phgA	http://dictybase.org/gene/DDB_G0269130	0.074373	0.021956	0.335971
ebp	http://dictybase.org/gene/DDB_G0269414	0.074352	0.081836	0.422442
csn6	http://dictybase.org/gene/DDB_G0293180	0.074344	0.131737	0.452811
DDB_G0281331	http://dictybase.org/gene/DDB_G0281331	0.074274	0.011976	0.278193
hspA	http://dictybase.org/gene/DDB_G0288181	0.074247	0.081836	0.422442
DDB_G0284847	http://dictybase.org/gene/DDB_G0284847	0.074199	0.091816	0.425182
DDB_G0287323	http://dictybase.org/gene/DDB_G0287323	0.074188	0.021956	0.335971
DDB_G0279749	http://dictybase.org/gene/DDB_G0279749	0.074154	0.111776	0.43735
expl1	http://dictybase.org/gene/DDB_G0267846	0.074153	0.031936	0.361464
aplA	http://dictybase.org/gene/DDB_G0284043	0.07412	0.111776	0.43735
clp1	http://dictybase.org/gene/DDB_G0285507	0.074049	0.011976	0.278193
csn7	http://dictybase.org/gene/DDB_G0271282	0.074036	0.131737	0.452811
DDB_G0280347	http://dictybase.org/gene/DDB_G0280347	0.073986	0.031936	0.361464
dduD	http://dictybase.org/gene/DDB_G0278875	0.073978	0.001996	0.119472
DDB_G0290225	http://dictybase.org/gene/DDB_G0290225	0.073946	0.061876	0.411303
DDB_G0291301	http://dictybase.org/gene/DDB_G0291301	0.073943	0.111776	0.43735
DDB_G0275951	http://dictybase.org/gene/DDB_G0275951	0.073936	0.031936	0.361464
psmA6	http://dictybase.org/gene/DDB_G0278847	0.073916	0.091816	0.425182
DDB_G0279357	http://dictybase.org/gene/DDB_G0279357	0.073911	0.001996	0.119472
DDB_G0267458	http://dictybase.org/gene/DDB_G0267458	0.073883	0.031936	0.361464
sdhC	http://dictybase.org/gene/DDB_G0275115	0.07386	0.121756	0.445769
gfm1	http://dictybase.org/gene/DDB_G0270482	0.073843	0.051896	0.401835
cprF	http://dictybase.org/gene/DDB_G0279185	0.073834	0.081836	0.422442
DDB_G0278163	http://dictybase.org/gene/DDB_G0278163	0.073809	0.031936	0.361464
psmB6	http://dictybase.org/gene/DDB_G0267390	0.073805	0.091816	0.425182
DDB_G0281617	http://dictybase.org/gene/DDB_G0281617	0.073801	0.041916	0.385023
cfaA	http://dictybase.org/gene/DDB_G0277809	0.073772	0.011976	0.278193
DDB_G0292438	http://dictybase.org/gene/DDB_G0292438	0.073764	0.001996	0.119472
hgd	http://dictybase.org/gene/DDB_G0283765	0.073763	0.001996	0.119472
DDB_G0288569	http://dictybase.org/gene/DDB_G0288569	0.073761	0.181637	0.485157
DDB_G0284433	http://dictybase.org/gene/DDB_G0284433	0.073656	0.001996	0.119472
ddi1	http://dictybase.org/gene/DDB_G0288187	0.073628	0.031936	0.361464
noxA	http://dictybase.org/gene/DDB_G0289653	0.073565	0.041916	0.385023
sdhB	http://dictybase.org/gene/DDB_G0270120	0.073512	0.151697	0.466919
sky1	http://dictybase.org/gene/DDB_G0275627	0.073478	0.001996	0.119472
purB	http://dictybase.org/gene/DDB_G0288333	0.07345	0.091816	0.425182
cdsA	http://dictybase.org/gene/DDB_G0269742	0.073437	0.091816	0.425182
sympk	http://dictybase.org/gene/DDB_G0284319	0.073309	0.051896	0.401835
psmD12	http://dictybase.org/gene/DDB_G0281051	0.073306	0.091816	0.425182
nup155	http://dictybase.org/gene/DDB_G0291163	0.073293	0.101796	0.428249
DDB_G0268518	http://dictybase.org/gene/DDB_G0268518	0.07329	0.111776	0.43735
DDB_G0271860	http://dictybase.org/gene/DDB_G0271860	0.073284	0.021956	0.335971
DDB_G0293958	http://dictybase.org/gene/DDB_G0293958	0.07328	0.031936	0.361464
DDB_G0283567	http://dictybase.org/gene/DDB_G0283567	0.073268	0.161677	0.472439
DDB_G0287335	http://dictybase.org/gene/DDB_G0287335	0.073196	0.041916	0.385023
DDB_G0279099	http://dictybase.org/gene/DDB_G0279099	0.073182	0.061876	0.411303
gdt6	http://dictybase.org/gene/DDB_G0270544	0.073178	0.001996	0.119472
scsB	http://dictybase.org/gene/DDB_G0274449	0.07316	0.071856	0.418802
DDB_G0275831	http://dictybase.org/gene/DDB_G0275831	0.07315	0.011976	0.278193
DDB_G0277189	http://dictybase.org/gene/DDB_G0277189	0.073138	0.101796	0.428249
phbB	http://dictybase.org/gene/DDB_G0284117	0.073134	0.101796	0.428249
DDB_G0270146	http://dictybase.org/gene/DDB_G0270146	0.073129	0.051896	0.401835
DDB_G0287367	http://dictybase.org/gene/DDB_G0287367	0.073121	0.071856	0.418802
DDB_G0281291	http://dictybase.org/gene/DDB_G0281291	0.073084	0.091816	0.425182
DDB_G0275205	http://dictybase.org/gene/DDB_G0275205	0.073037	0.041916	0.385023
vps26l	http://dictybase.org/gene/DDB_G0292212	0.073029	0.111776	0.43735
ku70	http://dictybase.org/gene/DDB_G0286069	0.073018	0.011976	0.278193
DDB_G0285463	http://dictybase.org/gene/DDB_G0285463	0.072981	0.021956	0.335971
ndufb7	http://dictybase.org/gene/DDB_G0280595	0.072974	0.111776	0.43735
DDB_G0281027	http://dictybase.org/gene/DDB_G0281027	0.072941	0.091816	0.425182
DDB_G0283817	http://dictybase.org/gene/DDB_G0283817	0.072864	0.031936	0.361464
DDB_G0291087_ps	http://dictybase.org/gene/DDB_G0291087	0.072834	0.011976	0.278193
thoc1	http://dictybase.org/gene/DDB_G0275717	0.072824	0.001996	0.119472
fam45	http://dictybase.org/gene/DDB_G0268448	0.072782	0.181637	0.485157
aspS2	http://dictybase.org/gene/DDB_G0272304	0.072768	0.011976	0.278193
DDB_G0276623	http://dictybase.org/gene/DDB_G0276623	0.072721	0.001996	0.119472
DDB_G0275415	http://dictybase.org/gene/DDB_G0275415	0.072696	0.051896	0.401835
med17	http://dictybase.org/gene/DDB_G0279723	0.072683	0.011976	0.278193
DDB_G0288849	http://dictybase.org/gene/DDB_G0288849	0.072651	0.031936	0.361464
ddx49	http://dictybase.org/gene/DDB_G0270396	0.07265	0.011976	0.278193
mcfQ	http://dictybase.org/gene/DDB_G0272346	0.072645	0.091816	0.425182
cniB	http://dictybase.org/gene/DDB_G0279785	0.07261	0.041916	0.385023
DDB_G0278045	http://dictybase.org/gene/DDB_G0278045	0.072599	0.031936	0.361464
gpdA	http://dictybase.org/gene/DDB_G0275153	0.072585	0.081836	0.422442
purH	http://dictybase.org/gene/DDB_G0277087	0.072558	0.081836	0.422442
pdx1	http://dictybase.org/gene/DDB_G0288299	0.072557	0.081836	0.422442
hatB	http://dictybase.org/gene/DDB_G0282143	0.072541	0.071856	0.418802
DDB_G0269062	http://dictybase.org/gene/DDB_G0269062	0.072501	0.031936	0.361464
DDB_G0276365	http://dictybase.org/gene/DDB_G0276365	0.072452	0.031936	0.361464
prtA	http://dictybase.org/gene/DDB_G0271696	0.072411	0.011976	0.278193
pccA	http://dictybase.org/gene/DDB_G0275355	0.072393	0.061876	0.411303
DDB_G0286677	http://dictybase.org/gene/DDB_G0286677	0.072387	0.111776	0.43735
DDB_G0270800	http://dictybase.org/gene/DDB_G0270800	0.072368	0.081836	0.422442
cyp508A4	http://dictybase.org/gene/DDB_G0284535	0.072346	0.011976	0.278193
hspK	http://dictybase.org/gene/DDB_G0275525	0.072332	0.121756	0.445769
DDB_G0278837	http://dictybase.org/gene/DDB_G0278837	0.072326	0.011976	0.278193
DDB_G0292722	http://dictybase.org/gene/DDB_G0292722	0.072301	0.001996	0.119472
vatH	http://dictybase.org/gene/DDB_G0274553	0.072268	0.121756	0.445769
fam63A	http://dictybase.org/gene/DDB_G0269770	0.072266	0.041916	0.385023
dnajc19	http://dictybase.org/gene/DDB_G0283735	0.072259	0.151697	0.466919
abkD	http://dictybase.org/gene/DDB_G0284897	0.072256	0.001996	0.119472
pdhC	http://dictybase.org/gene/DDB_G0277847	0.072229	0.071856	0.418802
guaB	http://dictybase.org/gene/DDB_G0283701	0.072222	0.151697	0.466919
DDB_G0284755	http://dictybase.org/gene/DDB_G0284755	0.072195	0.121756	0.445769
DDB_G0270694	http://dictybase.org/gene/DDB_G0270694	0.07219	0.181637	0.485157
DDB_G0272382	http://dictybase.org/gene/DDB_G0272382	0.072183	0.011976	0.278193
rsmN	http://dictybase.org/gene/DDB_G0282651	0.072179	0.031936	0.361464
DDB_G0289991	http://dictybase.org/gene/DDB_G0289991	0.072171	0.121756	0.445769
DDB_G0283435	http://dictybase.org/gene/DDB_G0283435	0.072125	0.001996	0.119472
hus1	http://dictybase.org/gene/DDB_G0285353	0.072111	0.021956	0.335971
DDB_G0268222	http://dictybase.org/gene/DDB_G0268222	0.07208	0.151697	0.466919
grlJ	http://dictybase.org/gene/DDB_G0272150	0.072071	0.021956	0.335971
DDB_G0288475	http://dictybase.org/gene/DDB_G0288475	0.07206	0.011976	0.278193
gacN	http://dictybase.org/gene/DDB_G0279315	0.072057	0.131737	0.452811
DDB_G0277337	http://dictybase.org/gene/DDB_G0277337	0.072057	0.011976	0.278193
tmcC	http://dictybase.org/gene/DDB_G0289253	0.071974	0.031936	0.361464
DDB_G0290621	http://dictybase.org/gene/DDB_G0290621	0.071962	0.021956	0.335971
DDB_G0287201	http://dictybase.org/gene/DDB_G0287201	0.071938	0.081836	0.422442
act32	http://dictybase.org/gene/DDB_G0269544	0.071936	0.011976	0.278193
DDB_G0287843	http://dictybase.org/gene/DDB_G0287843	0.071933	0.091816	0.425182
forA	http://dictybase.org/gene/DDB_G0279607	0.071897	0.141717	0.459848
DDB_G0269050	http://dictybase.org/gene/DDB_G0269050	0.071861	0.131737	0.452811
mcfN	http://dictybase.org/gene/DDB_G0293646	0.071849	0.081836	0.422442
DDB_G0275049	http://dictybase.org/gene/DDB_G0275049	0.071802	0.101796	0.428249
argC	http://dictybase.org/gene/DDB_G0286257	0.071786	0.151697	0.466919
aatA	http://dictybase.org/gene/DDB_G0268664	0.071777	0.061876	0.411303
racM	http://dictybase.org/gene/DDB_G0289103	0.071757	0.081836	0.422442
dhps	http://dictybase.org/gene/DDB_G0285725	0.071688	0.021956	0.335971
DDB_G0283861	http://dictybase.org/gene/DDB_G0283861	0.071649	0.011976	0.278193
DDB_G0293236	http://dictybase.org/gene/DDB_G0293236	0.071633	0.131737	0.452811
DDB_G0288887	http://dictybase.org/gene/DDB_G0288887	0.071625	0.001996	0.119472
apm4	http://dictybase.org/gene/DDB_G0276945	0.071557	0.021956	0.335971
cdk5	http://dictybase.org/gene/DDB_G0288677	0.071541	0.181637	0.485157
irlC	http://dictybase.org/gene/DDB_G0270894	0.071539	0.071856	0.418802
DDB_G0270922	http://dictybase.org/gene/DDB_G0270922	0.071533	0.071856	0.418802
ssr1	http://dictybase.org/gene/DDB_G0283497	0.071493	0.091816	0.425182
raptor	http://dictybase.org/gene/DDB_G0270398	0.071427	0.151697	0.466919
dgtA	http://dictybase.org/gene/DDB_G0288321	0.071398	0.181637	0.485157
DDB_G0286311	http://dictybase.org/gene/DDB_G0286311	0.071381	0.011976	0.278193
DDB_G0281687	http://dictybase.org/gene/DDB_G0281687	0.071352	0.081836	0.422442
tmcB	http://dictybase.org/gene/DDB_G0289207	0.071329	0.041916	0.385023
uba5	http://dictybase.org/gene/DDB_G0293306	0.071269	0.041916	0.385023
DDB_G0281133	http://dictybase.org/gene/DDB_G0281133	0.071264	0.031936	0.361464
cap	http://dictybase.org/gene/DDB_G0288769	0.07126	0.111776	0.43735
DDB_G0293066	http://dictybase.org/gene/DDB_G0293066	0.071237	0.091816	0.425182
snrpD1	http://dictybase.org/gene/DDB_G0278027	0.071187	0.091816	0.425182
DDB_G0291310	http://dictybase.org/gene/DDB_G0291310	0.071172	0.001996	0.119472
hspG9	http://dictybase.org/gene/DDB_G0276953	0.071148	0.001996	0.119472
DDB_G0273105	http://dictybase.org/gene/DDB_G0273105	0.071127	0.051896	0.401835
DDB_G0276471	http://dictybase.org/gene/DDB_G0276471	0.07109	0.111776	0.43735
DDB_G0289715	http://dictybase.org/gene/DDB_G0289715	0.071006	0.121756	0.445769
mgluS	http://dictybase.org/gene/DDB_G0271906	0.070967	0.021956	0.335971
DDB_G0284079	http://dictybase.org/gene/DDB_G0284079	0.070901	0.061876	0.411303
proS	http://dictybase.org/gene/DDB_G0284197	0.070886	0.001996	0.119472
ragC	http://dictybase.org/gene/DDB_G0284495	0.070871	0.171657	0.479499
DDB_G0280287	http://dictybase.org/gene/DDB_G0280287	0.070813	0.021956	0.335971
cypE	http://dictybase.org/gene/DDB_G0269216	0.070795	0.161677	0.472439
DDB_G0267992	http://dictybase.org/gene/DDB_G0267992	0.070759	0.011976	0.278193
pop1	http://dictybase.org/gene/DDB_G0291320	0.070724	0.011976	0.278193
DDB_G0276247	http://dictybase.org/gene/DDB_G0276247	0.070721	0.011976	0.278193
xpr1	http://dictybase.org/gene/DDB_G0285957	0.070699	0.021956	0.335971
lmpB	http://dictybase.org/gene/DDB_G0287035	0.070697	0.171657	0.479499
DDB_G0269736	http://dictybase.org/gene/DDB_G0269736	0.070674	0.021956	0.335971
DDB_G0289141	http://dictybase.org/gene/DDB_G0289141	0.070663	0.011976	0.278193
DDB_G0290857	http://dictybase.org/gene/DDB_G0290857	0.070611	0.081836	0.422442
DDB_G0268872	http://dictybase.org/gene/DDB_G0268872	0.070578	0.021956	0.335971
trpS	http://dictybase.org/gene/DDB_G0269454	0.070557	0.011976	0.278193
psmB2	http://dictybase.org/gene/DDB_G0269472	0.070551	0.111776	0.43735
DDB_G0293922	http://dictybase.org/gene/DDB_G0293922	0.070535	0.071856	0.418802
nol10	http://dictybase.org/gene/DDB_G0292466	0.070526	0.011976	0.278193
docB	http://dictybase.org/gene/DDB_G0270404	0.070483	0.111776	0.43735
scsA	http://dictybase.org/gene/DDB_G0289325	0.070447	0.101796	0.428249
DDB_G0276445	http://dictybase.org/gene/DDB_G0276445	0.070338	0.091816	0.425182
uch1	http://dictybase.org/gene/DDB_G0282007	0.070331	0.031936	0.361464
DDB_G0276783	http://dictybase.org/gene/DDB_G0276783	0.070315	0.021956	0.335971
msp	http://dictybase.org/gene/DDB_G0277015	0.07031	0.111776	0.43735
DDB_G0281979	http://dictybase.org/gene/DDB_G0281979	0.070304	0.041916	0.385023
hspH	http://dictybase.org/gene/DDB_G0290187	0.070298	0.051896	0.401835
DDB_G0268194	http://dictybase.org/gene/DDB_G0268194	0.070244	0.011976	0.278193
psmA1	http://dictybase.org/gene/DDB_G0282363	0.070231	0.041916	0.385023
DDB_G0286583	http://dictybase.org/gene/DDB_G0286583	0.070203	0.021956	0.335971
DDB_G0267914	http://dictybase.org/gene/DDB_G0267914	0.070191	0.181637	0.485157
ints11	http://dictybase.org/gene/DDB_G0278189	0.070131	0.161677	0.472439
phbA	http://dictybase.org/gene/DDB_G0290123	0.070126	0.091816	0.425182
thoc2	http://dictybase.org/gene/DDB_G0291063	0.070076	0.161677	0.472439
DDB_G0284051	http://dictybase.org/gene/DDB_G0284051	0.070056	0.101796	0.428249
DDB_G0285763	http://dictybase.org/gene/DDB_G0285763	0.070046	0.021956	0.335971
cprD	http://dictybase.org/gene/DDB_G0278721	0.069948	0.121756	0.445769
rpl15-2	http://dictybase.org/gene/DDB_G0273983	0.069925	0.011976	0.278193
dpm2-1	http://dictybase.org/gene/DDB_G0272588	0.069882	0.101796	0.428249
DDB_G0281861	http://dictybase.org/gene/DDB_G0281861	0.069868	0.131737	0.452811
DDB_G0272877	http://dictybase.org/gene/DDB_G0272877	0.069862	0.121756	0.445769
DDB_G0275913	http://dictybase.org/gene/DDB_G0275913	0.069811	0.121756	0.445769
DDB_G0284015	http://dictybase.org/gene/DDB_G0284015	0.069784	0.091816	0.425182
ergic3	http://dictybase.org/gene/DDB_G0292002	0.069769	0.141717	0.459848
ddx17	http://dictybase.org/gene/DDB_G0293168	0.069762	0.091816	0.425182
DDB_G0269820	http://dictybase.org/gene/DDB_G0269820	0.069698	0.001996	0.119472
DDB_G0281415	http://dictybase.org/gene/DDB_G0281415	0.069684	0.041916	0.385023
coq7	http://dictybase.org/gene/DDB_G0280475	0.069678	0.101796	0.428249
DDB_G0287783	http://dictybase.org/gene/DDB_G0287783	0.069608	0.001996	0.119472
cpsf4	http://dictybase.org/gene/DDB_G0270148	0.069575	0.071856	0.418802
syn5	http://dictybase.org/gene/DDB_G0277565	0.069571	0.161677	0.472439
ivdA	http://dictybase.org/gene/DDB_G0279827	0.069567	0.061876	0.411303
DDB_G0293508	http://dictybase.org/gene/DDB_G0293508	0.069534	0.041916	0.385023
DDB_G0293678	http://dictybase.org/gene/DDB_G0293678	0.069512	0.051896	0.401835
DDB_G0268274	http://dictybase.org/gene/DDB_G0268274	0.069506	0.001996	0.119472
DDB_G0290649	http://dictybase.org/gene/DDB_G0290649	0.069504	0.131737	0.452811
gacV	http://dictybase.org/gene/DDB_G0293510	0.069493	0.061876	0.411303
hop2	http://dictybase.org/gene/DDB_G0280989	0.069472	0.131737	0.452811
rab24	http://dictybase.org/gene/DDB_G0268402	0.069455	0.131737	0.452811
DDB_G0295485	http://dictybase.org/gene/DDB_G0295485	0.069452	0.071856	0.418802
mcfO	http://dictybase.org/gene/DDB_G0283329	0.069445	0.071856	0.418802
DDB_G0280279	http://dictybase.org/gene/DDB_G0280279	0.069415	0.031936	0.361464
DDB_G0293956	http://dictybase.org/gene/DDB_G0293956	0.069401	0.121756	0.445769
DDB_G0295823	http://dictybase.org/gene/DDB_G0295823	0.069391	0.011976	0.278193
ubqK	http://dictybase.org/gene/DDB_G0280585	0.069275	0.161677	0.472439
gmd	http://dictybase.org/gene/DDB_G0284553	0.069244	0.011976	0.278193
redA	http://dictybase.org/gene/DDB_G0293904	0.069229	0.061876	0.411303
phlp3	http://dictybase.org/gene/DDB_G0293848	0.069226	0.051896	0.401835
ippB	http://dictybase.org/gene/DDB_G0268652	0.069204	0.111776	0.43735
DDB_G0276515	http://dictybase.org/gene/DDB_G0276515	0.06918	0.181637	0.485157
DDB_G0286421	http://dictybase.org/gene/DDB_G0286421	0.06917	0.141717	0.459848
grpA	http://dictybase.org/gene/DDB_G0293248	0.069162	0.031936	0.361464
DDB_G0272504	http://dictybase.org/gene/DDB_G0272504	0.069152	0.061876	0.411303
eif3J	http://dictybase.org/gene/DDB_G0287333	0.069106	0.111776	0.43735
DDB_G0292016	http://dictybase.org/gene/DDB_G0292016	0.069099	0.111776	0.43735
drkB	http://dictybase.org/gene/DDB_G0289709	0.069091	0.071856	0.418802
DDB_G0285981	http://dictybase.org/gene/DDB_G0285981	0.069044	0.051896	0.401835
srfD	http://dictybase.org/gene/DDB_G0283483	0.069037	0.041916	0.385023
DDB_G0271920	http://dictybase.org/gene/DDB_G0271920	0.069025	0.011976	0.278193
DDB_G0268018	http://dictybase.org/gene/DDB_G0268018	0.069015	0.101796	0.428249
ppiD	http://dictybase.org/gene/DDB_G0283663	0.069012	0.011976	0.278193
DDB_G0276007	http://dictybase.org/gene/DDB_G0276007	0.06901	0.081836	0.422442
DDB_G0291161	http://dictybase.org/gene/DDB_G0291161	0.068984	0.121756	0.445769
svkA	http://dictybase.org/gene/DDB_G0286359	0.06895	0.061876	0.411303
nosA	http://dictybase.org/gene/DDB_G0292264	0.068949	0.051896	0.401835
DDB_G0293480	http://dictybase.org/gene/DDB_G0293480	0.068941	0.091816	0.425182
ddx20	http://dictybase.org/gene/DDB_G0277527	0.068928	0.041916	0.385023
tagD	http://dictybase.org/gene/DDB_G0286123	0.06892	0.041916	0.385023
cepB	http://dictybase.org/gene/DDB_G0282485	0.068864	0.111776	0.43735
DDB_G0280423	http://dictybase.org/gene/DDB_G0280423	0.068852	0.161677	0.472439
rsc43	http://dictybase.org/gene/DDB_G0285251	0.068823	0.151697	0.466919
slc35b2	http://dictybase.org/gene/DDB_G0269602	0.068813	0.131737	0.452811
shkE	http://dictybase.org/gene/DDB_G0290451	0.068804	0.031936	0.361464
apm1	http://dictybase.org/gene/DDB_G0289247	0.068784	0.161677	0.472439
commd7	http://dictybase.org/gene/DDB_G0275055	0.068784	0.141717	0.459848
DDB_G0277227	http://dictybase.org/gene/DDB_G0277227	0.068774	0.031936	0.361464
irlF-1	http://dictybase.org/gene/DDB_G0273171	0.068696	0.061876	0.411303
DDB_G0290247	http://dictybase.org/gene/DDB_G0290247	0.068676	0.001996	0.119472
uox	http://dictybase.org/gene/DDB_G0286427	0.068671	0.081836	0.422442
vatC	http://dictybase.org/gene/DDB_G0284473	0.068641	0.131737	0.452811
fnkA	http://dictybase.org/gene/DDB_G0275561	0.068593	0.011976	0.278193
DDB_G0272939	http://dictybase.org/gene/DDB_G0272939	0.068573	0.011976	0.278193
DDB_G0279945	http://dictybase.org/gene/DDB_G0279945	0.068557	0.121756	0.445769
racC	http://dictybase.org/gene/DDB_G0293526	0.068539	0.211577	0.500998
gmppB	http://dictybase.org/gene/DDB_G0287619	0.068539	0.081836	0.422442
elmoF	http://dictybase.org/gene/DDB_G0267548	0.068522	0.031936	0.361464
psmB7	http://dictybase.org/gene/DDB_G0283679	0.068516	0.111776	0.43735
DDB_G0272434	http://dictybase.org/gene/DDB_G0272434	0.068495	0.021956	0.335971
DDB_G0284491	http://dictybase.org/gene/DDB_G0284491	0.068489	0.021956	0.335971
DDB_G0269926	http://dictybase.org/gene/DDB_G0269926	0.068488	0.011976	0.278193
ada	http://dictybase.org/gene/DDB_G0287371	0.068477	0.021956	0.335971
DDB_G0284997	http://dictybase.org/gene/DDB_G0284997	0.068438	0.151697	0.466919
DDB_G0277607	http://dictybase.org/gene/DDB_G0277607	0.068422	0.101796	0.428249
DDB_G0287643	http://dictybase.org/gene/DDB_G0287643	0.068407	0.031936	0.361464
DDB_G0304886	http://dictybase.org/gene/DDB_G0304886	0.0684	0.001996	0.119472
DDB_G0292186	http://dictybase.org/gene/DDB_G0292186	0.06838	0.051896	0.401835
DDB_G0284925	http://dictybase.org/gene/DDB_G0284925	0.068373	0.011976	0.278193
myoC	http://dictybase.org/gene/DDB_G0276617	0.068364	0.161677	0.472439
DDB_G0271270	http://dictybase.org/gene/DDB_G0271270	0.068344	0.081836	0.422442
polB	http://dictybase.org/gene/DDB_G0284713	0.06831	0.031936	0.361464
ndufa12	http://dictybase.org/gene/DDB_G0285783	0.068299	0.101796	0.428249
DDB_G0277251	http://dictybase.org/gene/DDB_G0277251	0.068295	0.031936	0.361464
rab2A	http://dictybase.org/gene/DDB_G0292268	0.068294	0.161677	0.472439
DDB_G0290597	http://dictybase.org/gene/DDB_G0290597	0.068286	0.141717	0.459848
DDB_G0289955	http://dictybase.org/gene/DDB_G0289955	0.068285	0.001996	0.119472
DDB_G0284999	http://dictybase.org/gene/DDB_G0284999	0.068284	0.021956	0.335971
fscH	http://dictybase.org/gene/DDB_G0292100	0.068279	0.021956	0.335971
fip1l1	http://dictybase.org/gene/DDB_G0288797	0.068252	0.061876	0.411303
rad54b	http://dictybase.org/gene/DDB_G0285117	0.068242	0.011976	0.278193
rabT2	http://dictybase.org/gene/DDB_G0269262	0.068211	0.061876	0.411303
proC	http://dictybase.org/gene/DDB_G0271142	0.068204	0.171657	0.479499
DDB_G0267866	http://dictybase.org/gene/DDB_G0267866	0.068202	0.041916	0.385023
mcee	http://dictybase.org/gene/DDB_G0275181	0.068148	0.111776	0.43735
gtf2h3	http://dictybase.org/gene/DDB_G0275517	0.068144	0.081836	0.422442
DDB_G0289199	http://dictybase.org/gene/DDB_G0289199	0.068144	0.161677	0.472439
DDB_G0288991	http://dictybase.org/gene/DDB_G0288991	0.068135	0.021956	0.335971
amyA	http://dictybase.org/gene/DDB_G0281547	0.068123	0.121756	0.445769
DDB_G0282033	http://dictybase.org/gene/DDB_G0282033	0.068105	0.091816	0.425182
sec61a	http://dictybase.org/gene/DDB_G0278885	0.068095	0.111776	0.43735
DDB_G0269766	http://dictybase.org/gene/DDB_G0269766	0.068086	0.091816	0.425182
ybl1	http://dictybase.org/gene/DDB_G0272222	0.068062	0.021956	0.335971
DDB_G0280201	http://dictybase.org/gene/DDB_G0280201	0.068012	0.021956	0.335971
DDB_G0281609	http://dictybase.org/gene/DDB_G0281609	0.068011	0.141717	0.459848
DDB_G0286767	http://dictybase.org/gene/DDB_G0286767	0.068002	0.001996	0.119472
ancA	http://dictybase.org/gene/DDB_G0267454	0.067979	0.111776	0.43735
DDB_G0287633	http://dictybase.org/gene/DDB_G0287633	0.067966	0.021956	0.335971
empD	http://dictybase.org/gene/DDB_G0277923	0.067961	0.131737	0.452811
DDB_G0282841	http://dictybase.org/gene/DDB_G0282841	0.067947	0.011976	0.278193
DDB_G0290147	http://dictybase.org/gene/DDB_G0290147	0.067938	0.021956	0.335971
DDB_G0284959	http://dictybase.org/gene/DDB_G0284959	0.067931	0.011976	0.278193
DDB_G0271120	http://dictybase.org/gene/DDB_G0271120	0.067923	0.151697	0.466919
DDB_G0276135	http://dictybase.org/gene/DDB_G0276135	0.067915	0.001996	0.119472
DDB_G0278831	http://dictybase.org/gene/DDB_G0278831	0.067901	0.091816	0.425182
empA	http://dictybase.org/gene/DDB_G0288053	0.067892	0.131737	0.452811
nat10	http://dictybase.org/gene/DDB_G0268868	0.067886	0.041916	0.385023
DDB_G0282011	http://dictybase.org/gene/DDB_G0282011	0.06788	0.011976	0.278193
argS2	http://dictybase.org/gene/DDB_G0287803	0.06783	0.101796	0.428249
comG	http://dictybase.org/gene/DDB_G0292270	0.067821	0.111776	0.43735
scsC	http://dictybase.org/gene/DDB_G0271842	0.067801	0.081836	0.422442
DDB_G0271552	http://dictybase.org/gene/DDB_G0271552	0.067799	0.101796	0.428249
vps37	http://dictybase.org/gene/DDB_G0269510	0.06779	0.081836	0.422442
DDB_G0272720	http://dictybase.org/gene/DDB_G0272720	0.067787	0.001996	0.119472
DDB_G0284681	http://dictybase.org/gene/DDB_G0284681	0.067702	0.141717	0.459848
DDB_G0285529	http://dictybase.org/gene/DDB_G0285529	0.067672	0.011976	0.278193
DDB_G0274141	http://dictybase.org/gene/DDB_G0274141	0.067643	0.021956	0.335971
DDB_G0287793	http://dictybase.org/gene/DDB_G0287793	0.067642	0.121756	0.445769
fscE	http://dictybase.org/gene/DDB_G0272306	0.067639	0.041916	0.385023
atg6B	http://dictybase.org/gene/DDB_G0288021	0.067629	0.081836	0.422442
DDB_G0269734	http://dictybase.org/gene/DDB_G0269734	0.067621	0.161677	0.472439
DDB_G0269086	http://dictybase.org/gene/DDB_G0269086	0.067609	0.011976	0.278193
DDB_G0269890	http://dictybase.org/gene/DDB_G0269890	0.067532	0.141717	0.459848
DDB_G0287325	http://dictybase.org/gene/DDB_G0287325	0.067528	0.051896	0.401835
cbp2	http://dictybase.org/gene/DDB_G0267456	0.067518	0.071856	0.418802
trmt11	http://dictybase.org/gene/DDB_G0283969	0.067518	0.011976	0.278193
phesA	http://dictybase.org/gene/DDB_G0287141	0.067501	0.011976	0.278193
DDB_G0282255	http://dictybase.org/gene/DDB_G0282255	0.067475	0.001996	0.119472
lip1	http://dictybase.org/gene/DDB_G0268966	0.067375	0.111776	0.43735
csn5	http://dictybase.org/gene/DDB_G0284597	0.067368	0.131737	0.452811
DDB_G0291548	http://dictybase.org/gene/DDB_G0291548	0.067339	0.011976	0.278193
ippA	http://dictybase.org/gene/DDB_G0275663	0.067333	0.001996	0.119472
wdr3	http://dictybase.org/gene/DDB_G0282623	0.067329	0.001996	0.119472
DDB_G0287671	http://dictybase.org/gene/DDB_G0287671	0.067323	0.011976	0.278193
DDB_G0267570	http://dictybase.org/gene/DDB_G0267570	0.067305	0.101796	0.428249
DDB_G0269488	http://dictybase.org/gene/DDB_G0269488	0.067293	0.081836	0.422442
nagB	http://dictybase.org/gene/DDB_G0282539	0.067293	0.131737	0.452811
DDB_G0280105	http://dictybase.org/gene/DDB_G0280105	0.067289	0.171657	0.479499
grlL	http://dictybase.org/gene/DDB_G0281211	0.067289	0.031936	0.361464
DDB_G0270752	http://dictybase.org/gene/DDB_G0270752	0.067285	0.081836	0.422442
DDB_G0282279	http://dictybase.org/gene/DDB_G0282279	0.067258	0.011976	0.278193
pakB	http://dictybase.org/gene/DDB_G0276459	0.067245	0.101796	0.428249
DDB_G0269740	http://dictybase.org/gene/DDB_G0269740	0.067215	0.131737	0.452811
dynF	http://dictybase.org/gene/DDB_G0290757	0.067208	0.091816	0.425182
DDB_G0274223	http://dictybase.org/gene/DDB_G0274223	0.067201	0.071856	0.418802
qtrt1	http://dictybase.org/gene/DDB_G0291802	0.067201	0.011976	0.278193
DDB_G0276035	http://dictybase.org/gene/DDB_G0276035	0.067192	0.141717	0.459848
hspL	http://dictybase.org/gene/DDB_G0267668	0.067115	0.141717	0.459848
spt4	http://dictybase.org/gene/DDB_G0285293	0.067114	0.121756	0.445769
vatB	http://dictybase.org/gene/DDB_G0277401	0.067096	0.091816	0.425182
metK	http://dictybase.org/gene/DDB_G0291179	0.067095	0.091816	0.425182
DDB_G0293680	http://dictybase.org/gene/DDB_G0293680	0.066991	0.001996	0.119472
cdc123	http://dictybase.org/gene/DDB_G0276129	0.066983	0.031936	0.361464
DDB_G0277793	http://dictybase.org/gene/DDB_G0277793	0.066951	0.241517	0.500998
DDB_G0283293	http://dictybase.org/gene/DDB_G0283293	0.066879	0.081836	0.422442
DDB_G0277657	http://dictybase.org/gene/DDB_G0277657	0.066873	0.001996	0.119472
cysS	http://dictybase.org/gene/DDB_G0287159	0.066855	0.091816	0.425182
DDB_G0285485	http://dictybase.org/gene/DDB_G0285485	0.066843	0.091816	0.425182
DDB_G0279211	http://dictybase.org/gene/DDB_G0279211	0.06682	0.071856	0.418802
DDB_G0287439	http://dictybase.org/gene/DDB_G0287439	0.066792	0.141717	0.459848
cysA	http://dictybase.org/gene/DDB_G0269122	0.066792	0.131737	0.452811
iliN	http://dictybase.org/gene/DDB_G0278481	0.066784	0.081836	0.422442
DDB_G0287903	http://dictybase.org/gene/DDB_G0287903	0.066764	0.011976	0.278193
vatA	http://dictybase.org/gene/DDB_G0287127	0.066762	0.121756	0.445769
DDB_G0269370	http://dictybase.org/gene/DDB_G0269370	0.066744	0.021956	0.335971
DDB_G0292602	http://dictybase.org/gene/DDB_G0292602	0.066737	0.081836	0.422442
gnt15	http://dictybase.org/gene/DDB_G0274741	0.06672	0.201597	0.498339
DDB_G0271288	http://dictybase.org/gene/DDB_G0271288	0.066712	0.031936	0.361464
DDB_G0289461	http://dictybase.org/gene/DDB_G0289461	0.066677	0.021956	0.335971
DDB_G0293208	http://dictybase.org/gene/DDB_G0293208	0.066675	0.031936	0.361464
DDB_G0287811	http://dictybase.org/gene/DDB_G0287811	0.066663	0.111776	0.43735
DDB_G0270256	http://dictybase.org/gene/DDB_G0270256	0.066641	0.141717	0.459848
DDB_G0275603	http://dictybase.org/gene/DDB_G0275603	0.066616	0.021956	0.335971
rab1B	http://dictybase.org/gene/DDB_G0277867	0.066607	0.131737	0.452811
DDB_G0275469	http://dictybase.org/gene/DDB_G0275469	0.066565	0.011976	0.278193
DDB_G0273393	http://dictybase.org/gene/DDB_G0273393	0.06653	0.021956	0.335971
ube2t	http://dictybase.org/gene/DDB_G0291199	0.066528	0.041916	0.385023
gpgA	http://dictybase.org/gene/DDB_G0274125	0.066517	0.141717	0.459848
DDB_G0289547	http://dictybase.org/gene/DDB_G0289547	0.066503	0.011976	0.278193
cfaD	http://dictybase.org/gene/DDB_G0281605	0.066498	0.071856	0.418802
usp14	http://dictybase.org/gene/DDB_G0271264	0.066432	0.021956	0.335971
rabF1-1	http://dictybase.org/gene/DDB_G0272905	0.066417	0.101796	0.428249
DDB_G0288697	http://dictybase.org/gene/DDB_G0288697	0.066393	0.131737	0.452811
DDB_G0278111	http://dictybase.org/gene/DDB_G0278111	0.06639	0.031936	0.361464
DDB_G0277375	http://dictybase.org/gene/DDB_G0277375	0.066374	0.001996	0.119472
tssc1	http://dictybase.org/gene/DDB_G0274279	0.066309	0.221557	0.500998
DDB_G0292058	http://dictybase.org/gene/DDB_G0292058	0.066285	0.201597	0.498339
DDB_G0280393	http://dictybase.org/gene/DDB_G0280393	0.066282	0.131737	0.452811
vps33	http://dictybase.org/gene/DDB_G0291097	0.066221	0.161677	0.472439
DDB_G0285681	http://dictybase.org/gene/DDB_G0285681	0.066218	0.031936	0.361464
DDB_G0280881	http://dictybase.org/gene/DDB_G0280881	0.066212	0.101796	0.428249
DDB_G0270708	http://dictybase.org/gene/DDB_G0270708	0.066209	0.161677	0.472439
DDB_G0288579	http://dictybase.org/gene/DDB_G0288579	0.066201	0.101796	0.428249
ssr3	http://dictybase.org/gene/DDB_G0267524	0.066179	0.101796	0.428249
alg12	http://dictybase.org/gene/DDB_G0267884	0.066174	0.021956	0.335971
DDB_G0293836	http://dictybase.org/gene/DDB_G0293836	0.066153	0.011976	0.278193
DDB_G0268146	http://dictybase.org/gene/DDB_G0268146	0.066152	0.091816	0.425182
DDB_G0287555	http://dictybase.org/gene/DDB_G0287555	0.066134	0.061876	0.411303
DDB_G0268424	http://dictybase.org/gene/DDB_G0268424	0.066094	0.021956	0.335971
DDB_G0288435	http://dictybase.org/gene/DDB_G0288435	0.066069	0.211577	0.500998
DDB_G0291554	http://dictybase.org/gene/DDB_G0291554	0.066059	0.111776	0.43735
ost4	http://dictybase.org/gene/DDB_G0280609	0.066039	0.091816	0.425182
spc1	http://dictybase.org/gene/DDB_G0278371	0.066036	0.161677	0.472439
DDB_G0291374	http://dictybase.org/gene/DDB_G0291374	0.066	0.061876	0.411303
tyrS	http://dictybase.org/gene/DDB_G0276721	0.065959	0.141717	0.459848
icmA-1	http://dictybase.org/gene/DDB_G0272799	0.065959	0.031936	0.361464
DDB_G0285269	http://dictybase.org/gene/DDB_G0285269	0.065921	0.061876	0.411303
repD	http://dictybase.org/gene/DDB_G0267414	0.065903	0.011976	0.278193
cbpM	http://dictybase.org/gene/DDB_G0286371	0.065898	0.071856	0.418802
DDB_G0269640	http://dictybase.org/gene/DDB_G0269640	0.06589	0.011976	0.278193
pldZ	http://dictybase.org/gene/DDB_G0282579	0.065883	0.081836	0.422442
manE	http://dictybase.org/gene/DDB_G0278651	0.065842	0.031936	0.361464
DDB_G0280327	http://dictybase.org/gene/DDB_G0280327	0.065795	0.001996	0.119472
DDB_G0283989	http://dictybase.org/gene/DDB_G0283989	0.06568	0.181637	0.485157
DDB_G0284247	http://dictybase.org/gene/DDB_G0284247	0.065672	0.031936	0.361464
DDB_G0281313	http://dictybase.org/gene/DDB_G0281313	0.065639	0.151697	0.466919
mrpl27	http://dictybase.org/gene/DDB_G0278889	0.065625	0.021956	0.335971
DDB_G0290223	http://dictybase.org/gene/DDB_G0290223	0.065616	0.171657	0.479499
myoF	http://dictybase.org/gene/DDB_G0289177	0.065612	0.061876	0.411303
cmfB	http://dictybase.org/gene/DDB_G0289157	0.065567	0.091816	0.425182
DDB_G0283439	http://dictybase.org/gene/DDB_G0283439	0.06556	0.131737	0.452811
rtc1	http://dictybase.org/gene/DDB_G0276159	0.065552	0.021956	0.335971
DDB_G0286829	http://dictybase.org/gene/DDB_G0286829	0.065547	0.091816	0.425182
DDB_G0279039	http://dictybase.org/gene/DDB_G0279039	0.065526	0.161677	0.472439
DDB_G0288641	http://dictybase.org/gene/DDB_G0288641	0.065502	0.101796	0.428249
DDB_G0272028	http://dictybase.org/gene/DDB_G0272028	0.065493	0.091816	0.425182
cupA	http://dictybase.org/gene/DDB_G0267466	0.065482	0.031936	0.361464
rft1	http://dictybase.org/gene/DDB_G0288491	0.065459	0.081836	0.422442
cct6	http://dictybase.org/gene/DDB_G0277493	0.065445	0.111776	0.43735
rpb4	http://dictybase.org/gene/DDB_G0282739	0.065439	0.151697	0.466919
DDB_G0271752	http://dictybase.org/gene/DDB_G0271752	0.06542	0.021956	0.335971
DDB_G0285729	http://dictybase.org/gene/DDB_G0285729	0.065378	0.021956	0.335971
DDB_G0289833	http://dictybase.org/gene/DDB_G0289833	0.065331	0.161677	0.472439
DDB_G0285813	http://dictybase.org/gene/DDB_G0285813	0.065297	0.181637	0.485157
psmA3	http://dictybase.org/gene/DDB_G0267408	0.065282	0.111776	0.43735
DDB_G0270718	http://dictybase.org/gene/DDB_G0270718	0.065259	0.021956	0.335971
pdx2	http://dictybase.org/gene/DDB_G0288305	0.065227	0.111776	0.43735
gpt3	http://dictybase.org/gene/DDB_G0277597	0.065197	0.071856	0.418802
dpp3-1	http://dictybase.org/gene/DDB_G0273471	0.065197	0.131737	0.452811
DDB_G0272734	http://dictybase.org/gene/DDB_G0272734	0.065169	0.001996	0.119472
gtf3C3	http://dictybase.org/gene/DDB_G0278321	0.06513	0.131737	0.452811
DDB_G0283271	http://dictybase.org/gene/DDB_G0283271	0.065111	0.021956	0.335971
manD	http://dictybase.org/gene/DDB_G0278653	0.065081	0.051896	0.401835
DDB_G0273237	http://dictybase.org/gene/DDB_G0273237	0.065058	0.041916	0.385023
DDB_G0283727	http://dictybase.org/gene/DDB_G0283727	0.065044	0.031936	0.361464
DDB_G0269564	http://dictybase.org/gene/DDB_G0269564	0.065043	0.051896	0.401835
DDB_G0279011	http://dictybase.org/gene/DDB_G0279011	0.064995	0.161677	0.472439
DDB_G0287071	http://dictybase.org/gene/DDB_G0287071	0.064971	0.021956	0.335971
DDB_G0282603	http://dictybase.org/gene/DDB_G0282603	0.064954	0.011976	0.278193
DDB_G0283455	http://dictybase.org/gene/DDB_G0283455	0.06493	0.041916	0.385023
DDB_G0279265	http://dictybase.org/gene/DDB_G0279265	0.064927	0.041916	0.385023
DDB_G0292630	http://dictybase.org/gene/DDB_G0292630	0.064927	0.081836	0.422442
DDB_G0279627	http://dictybase.org/gene/DDB_G0279627	0.064915	0.101796	0.428249
mecr	http://dictybase.org/gene/DDB_G0278095	0.064912	0.091816	0.425182
pldY	http://dictybase.org/gene/DDB_G0287649	0.064879	0.071856	0.418802
gaa	http://dictybase.org/gene/DDB_G0269790	0.064877	0.151697	0.466919
gerD	http://dictybase.org/gene/DDB_G0291856	0.064864	0.141717	0.459848
adh5	http://dictybase.org/gene/DDB_G0281865	0.064804	0.011976	0.278193
mkkA	http://dictybase.org/gene/DDB_G0283265	0.064798	0.061876	0.411303
DDB_G0285649	http://dictybase.org/gene/DDB_G0285649	0.064758	0.161677	0.472439
DDB_G0278103	http://dictybase.org/gene/DDB_G0278103	0.064746	0.131737	0.452811
rac1C	http://dictybase.org/gene/DDB_G0282365	0.064743	0.071856	0.418802
DDB_G0289335	http://dictybase.org/gene/DDB_G0289335	0.064735	0.101796	0.428249
DDB_G0268044	http://dictybase.org/gene/DDB_G0268044	0.064734	0.141717	0.459848
rab1C	http://dictybase.org/gene/DDB_G0269174	0.064723	0.131737	0.452811
pex19	http://dictybase.org/gene/DDB_G0274873	0.0647	0.031936	0.361464
uba2	http://dictybase.org/gene/DDB_G0286919	0.064686	0.051896	0.401835
amfr	http://dictybase.org/gene/DDB_G0279345	0.064639	0.071856	0.418802
arfA	http://dictybase.org/gene/DDB_G0289173	0.064567	0.211577	0.500998
DDB_G0269482	http://dictybase.org/gene/DDB_G0269482	0.064556	0.071856	0.418802
timm17	http://dictybase.org/gene/DDB_G0287627	0.064544	0.071856	0.418802
DDB_G0280163	http://dictybase.org/gene/DDB_G0280163	0.0645	0.001996	0.119472
DDB_G0271904	http://dictybase.org/gene/DDB_G0271904	0.064476	0.211577	0.500998
lpd	http://dictybase.org/gene/DDB_G0291648	0.064458	0.061876	0.411303
DDB_G0287415	http://dictybase.org/gene/DDB_G0287415	0.064454	0.111776	0.43735
DDB_G0274439	http://dictybase.org/gene/DDB_G0274439	0.064451	0.011976	0.278193
DDB_G0288089	http://dictybase.org/gene/DDB_G0288089	0.064448	0.061876	0.411303
rab2B	http://dictybase.org/gene/DDB_G0272138	0.064431	0.191617	0.492298
alaS	http://dictybase.org/gene/DDB_G0277823	0.064422	0.111776	0.43735
tpiA	http://dictybase.org/gene/DDB_G0274471	0.064409	0.111776	0.43735
rabP	http://dictybase.org/gene/DDB_G0290875	0.064378	0.081836	0.422442
DDB_G0288947	http://dictybase.org/gene/DDB_G0288947	0.064354	0.251497	0.500998
DDB_G0280371	http://dictybase.org/gene/DDB_G0280371	0.064351	0.021956	0.335971
nacB	http://dictybase.org/gene/DDB_G0281795	0.064335	0.061876	0.411303
gfm2	http://dictybase.org/gene/DDB_G0267766	0.064326	0.001996	0.119472
pyd3	http://dictybase.org/gene/DDB_G0274123	0.064322	0.151697	0.466919
samkA	http://dictybase.org/gene/DDB_G0269876	0.064295	0.021956	0.335971
DDB_G0279557	http://dictybase.org/gene/DDB_G0279557	0.064262	0.001996	0.119472
DDB_G0267906	http://dictybase.org/gene/DDB_G0267906	0.064251	0.031936	0.361464
DDB_G0289621	http://dictybase.org/gene/DDB_G0289621	0.064245	0.101796	0.428249
pccB	http://dictybase.org/gene/DDB_G0276341	0.064227	0.091816	0.425182
fcf1	http://dictybase.org/gene/DDB_G0267606	0.064203	0.061876	0.411303
DDB_G0279999	http://dictybase.org/gene/DDB_G0279999	0.064141	0.151697	0.466919
eIF4g	http://dictybase.org/gene/DDB_G0275395	0.064115	0.061876	0.411303
DDB_G0281835	http://dictybase.org/gene/DDB_G0281835	0.064082	0.061876	0.411303
DDB_G0272785	http://dictybase.org/gene/DDB_G0272785	0.064077	0.141717	0.459848
DDB_G0287407	http://dictybase.org/gene/DDB_G0287407	0.064046	0.051896	0.401835
ctsB	http://dictybase.org/gene/DDB_G0283921	0.064026	0.121756	0.445769
DDB_G0267616	http://dictybase.org/gene/DDB_G0267616	0.064023	0.001996	0.119472
DDB_G0284169	http://dictybase.org/gene/DDB_G0284169	0.06401	0.171657	0.479499
DDB_G0280477	http://dictybase.org/gene/DDB_G0280477	0.063986	0.051896	0.401835
DDB_G0292612	http://dictybase.org/gene/DDB_G0292612	0.063934	0.031936	0.361464
DDB_G0279491	http://dictybase.org/gene/DDB_G0279491	0.06388	0.041916	0.385023
acly	http://dictybase.org/gene/DDB_G0278345	0.063866	0.141717	0.459848
DDB_G0270864	http://dictybase.org/gene/DDB_G0270864	0.063849	0.031936	0.361464
colA_ps9	http://dictybase.org/gene/DDB_G0277587	0.063833	0.001996	0.119472
DDB_G0272460	http://dictybase.org/gene/DDB_G0272460	0.06382	0.001996	0.119472
DDB_G0290425	http://dictybase.org/gene/DDB_G0290425	0.063816	0.011976	0.278193
DDB_G0289921	http://dictybase.org/gene/DDB_G0289921	0.063815	0.021956	0.335971
DDB_G0278861	http://dictybase.org/gene/DDB_G0278861	0.063805	0.041916	0.385023
sptA	http://dictybase.org/gene/DDB_G0268056	0.06379	0.181637	0.485157
spoT	http://dictybase.org/gene/DDB_G0287233	0.063786	0.021956	0.335971
tsg101	http://dictybase.org/gene/DDB_G0286797	0.063709	0.131737	0.452811
gdap2	http://dictybase.org/gene/DDB_G0284349	0.063699	0.011976	0.278193
DDB_G0283481	http://dictybase.org/gene/DDB_G0283481	0.063656	0.231537	0.500998
srp68	http://dictybase.org/gene/DDB_G0285821	0.06365	0.191617	0.492298
vps60	http://dictybase.org/gene/DDB_G0287993	0.063649	0.141717	0.459848
cyp519B1	http://dictybase.org/gene/DDB_G0284089	0.063638	0.041916	0.385023
mre11	http://dictybase.org/gene/DDB_G0293546	0.063609	0.031936	0.361464
DDB_G0284477	http://dictybase.org/gene/DDB_G0284477	0.063604	0.021956	0.335971
pitA	http://dictybase.org/gene/DDB_G0290069	0.063602	0.091816	0.425182
DDB_G0288925	http://dictybase.org/gene/DDB_G0288925	0.063595	0.121756	0.445769
rps30-2	http://dictybase.org/gene/DDB_G0273743	0.063589	0.021956	0.335971
phesB	http://dictybase.org/gene/DDB_G0277303	0.063572	0.011976	0.278193
DDB_G0283253	http://dictybase.org/gene/DDB_G0283253	0.063543	0.181637	0.485157
DDB_G0275629	http://dictybase.org/gene/DDB_G0275629	0.063518	0.021956	0.335971
DDB_G0284921	http://dictybase.org/gene/DDB_G0284921	0.063497	0.011976	0.278193
mlysS	http://dictybase.org/gene/DDB_G0286517	0.063496	0.001996	0.119472
plbA	http://dictybase.org/gene/DDB_G0276767	0.063483	0.131737	0.452811
gsr	http://dictybase.org/gene/DDB_G0272754	0.063418	0.151697	0.466919
bkdB	http://dictybase.org/gene/DDB_G0268020	0.063408	0.081836	0.422442
DDB_G0281909	http://dictybase.org/gene/DDB_G0281909	0.063395	0.121756	0.445769
DDB_G0292570	http://dictybase.org/gene/DDB_G0292570	0.063388	0.071856	0.418802
DDB_G0273555	http://dictybase.org/gene/DDB_G0273555	0.06336	0.051896	0.401835
uduA2	http://dictybase.org/gene/DDB_G0267726	0.063352	0.071856	0.418802
DDB_G0272901	http://dictybase.org/gene/DDB_G0272901	0.063349	0.221557	0.500998
DDB_G0285775	http://dictybase.org/gene/DDB_G0285775	0.063333	0.001996	0.119472
DDB_G0281049	http://dictybase.org/gene/DDB_G0281049	0.063323	0.021956	0.335971
ublcp1-1	http://dictybase.org/gene/DDB_G0273117	0.063301	0.101796	0.428249
DDB_G0267742	http://dictybase.org/gene/DDB_G0267742	0.063272	0.061876	0.411303
psmG2	http://dictybase.org/gene/DDB_G0274447	0.063224	0.021956	0.335971
DDB_G0267712	http://dictybase.org/gene/DDB_G0267712	0.063218	0.081836	0.422442
shmt2	http://dictybase.org/gene/DDB_G0291652	0.063207	0.101796	0.428249
DDB_G0273483	http://dictybase.org/gene/DDB_G0273483	0.063181	0.061876	0.411303
nit1-1	http://dictybase.org/gene/DDB_G0273457	0.06318	0.011976	0.278193
DDB_G0274609	http://dictybase.org/gene/DDB_G0274609	0.063176	0.031936	0.361464
DDB_G0268450	http://dictybase.org/gene/DDB_G0268450	0.063146	0.011976	0.278193
DDB_G0295701	http://dictybase.org/gene/DDB_G0295701	0.063143	0.061876	0.411303
DDB_G0271836	http://dictybase.org/gene/DDB_G0271836	0.06313	0.031936	0.361464
DDB_G0281967	http://dictybase.org/gene/DDB_G0281967	0.063125	0.121756	0.445769
taf11	http://dictybase.org/gene/DDB_G0278843	0.063118	0.131737	0.452811
DDB_G0288325	http://dictybase.org/gene/DDB_G0288325	0.063109	0.041916	0.385023
trappc3	http://dictybase.org/gene/DDB_G0277135	0.063096	0.241517	0.500998
tspD	http://dictybase.org/gene/DDB_G0270682	0.063066	0.251497	0.500998
DDB_G0284687	http://dictybase.org/gene/DDB_G0284687	0.063048	0.021956	0.335971
DDB_G0282201	http://dictybase.org/gene/DDB_G0282201	0.063014	0.131737	0.452811
DDB_G0275059	http://dictybase.org/gene/DDB_G0275059	0.063009	0.091816	0.425182
copB2	http://dictybase.org/gene/DDB_G0278285	0.062997	0.101796	0.428249
DDB_G0291754	http://dictybase.org/gene/DDB_G0291754	0.062971	0.041916	0.385023
DDB_G0292006	http://dictybase.org/gene/DDB_G0292006	0.062967	0.081836	0.422442
wdr75	http://dictybase.org/gene/DDB_G0268898	0.062955	0.021956	0.335971
H2AX	http://dictybase.org/gene/DDB_G0279667	0.062953	0.121756	0.445769
cblA-1	http://dictybase.org/gene/DDB_G0273141	0.062953	0.061876	0.411303
DDB_G0292086_ps	http://dictybase.org/gene/DDB_G0292086	0.062948	0.011976	0.278193
fhkE	http://dictybase.org/gene/DDB_G0280321	0.062934	0.071856	0.418802
DDB_G0275311	http://dictybase.org/gene/DDB_G0275311	0.062923	0.091816	0.425182
DDB_G0288477	http://dictybase.org/gene/DDB_G0288477	0.062909	0.031936	0.361464
DDB_G0284805	http://dictybase.org/gene/DDB_G0284805	0.062886	0.121756	0.445769
lsm5	http://dictybase.org/gene/DDB_G0268716	0.062873	0.041916	0.385023
DDB_G0281219	http://dictybase.org/gene/DDB_G0281219	0.062852	0.001996	0.119472
napA	http://dictybase.org/gene/DDB_G0274519	0.062836	0.131737	0.452811
top1	http://dictybase.org/gene/DDB_G0283205	0.062793	0.091816	0.425182
DDB_G0287397	http://dictybase.org/gene/DDB_G0287397	0.062778	0.081836	0.422442
psmA5	http://dictybase.org/gene/DDB_G0268538	0.062766	0.101796	0.428249
upf1	http://dictybase.org/gene/DDB_G0288923	0.062766	0.101796	0.428249
grlB	http://dictybase.org/gene/DDB_G0271686	0.062765	0.081836	0.422442
ddx27	http://dictybase.org/gene/DDB_G0281711	0.062763	0.021956	0.335971
timm23	http://dictybase.org/gene/DDB_G0286541	0.062693	0.131737	0.452811
fcsA	http://dictybase.org/gene/DDB_G0269242	0.062689	0.131737	0.452811
yipf5	http://dictybase.org/gene/DDB_G0283541	0.062685	0.111776	0.43735
DDB_G0279589	http://dictybase.org/gene/DDB_G0279589	0.062679	0.011976	0.278193
naa20	http://dictybase.org/gene/DDB_G0276345	0.062674	0.151697	0.466919
DDB_G0269342	http://dictybase.org/gene/DDB_G0269342	0.062661	0.211577	0.500998
DDB_G0273085	http://dictybase.org/gene/DDB_G0273085	0.062651	0.161677	0.472439
DDB_G0269514	http://dictybase.org/gene/DDB_G0269514	0.062628	0.031936	0.361464
DDB_G0292900	http://dictybase.org/gene/DDB_G0292900	0.062616	0.171657	0.479499
DDB_G0274663	http://dictybase.org/gene/DDB_G0274663	0.062603	0.131737	0.452811
DDB_G0275767	http://dictybase.org/gene/DDB_G0275767	0.062569	0.031936	0.361464
DDB_G0287369	http://dictybase.org/gene/DDB_G0287369	0.062548	0.021956	0.335971
DDB_G0288221	http://dictybase.org/gene/DDB_G0288221	0.062528	0.031936	0.361464
DDB_G0278773	http://dictybase.org/gene/DDB_G0278773	0.062523	0.191617	0.492298
DDB_G0282135	http://dictybase.org/gene/DDB_G0282135	0.062517	0.031936	0.361464
fadB	http://dictybase.org/gene/DDB_G0282147	0.062498	0.051896	0.401835
DDB_G0282451	http://dictybase.org/gene/DDB_G0282451	0.062452	0.101796	0.428249
DDB_G0269652	http://dictybase.org/gene/DDB_G0269652	0.062422	0.121756	0.445769
DDB_G0279717	http://dictybase.org/gene/DDB_G0279717	0.062402	0.121756	0.445769
DDB_G0269994	http://dictybase.org/gene/DDB_G0269994	0.062371	0.001996	0.119472
tgrB1	http://dictybase.org/gene/DDB_G0280689	0.062346	0.101796	0.428249
DDB_G0287081	http://dictybase.org/gene/DDB_G0287081	0.062306	0.001996	0.119472
mtrpS	http://dictybase.org/gene/DDB_G0274567	0.062303	0.041916	0.385023
psmD4	http://dictybase.org/gene/DDB_G0275775	0.062284	0.031936	0.361464
DDB_G0286135	http://dictybase.org/gene/DDB_G0286135	0.062277	0.021956	0.335971
fslH	http://dictybase.org/gene/DDB_G0274773	0.062262	0.031936	0.361464
DDB_G0293034	http://dictybase.org/gene/DDB_G0293034	0.062261	0.091816	0.425182
DDB_G0288929	http://dictybase.org/gene/DDB_G0288929	0.06226	0.061876	0.411303
uduD2	http://dictybase.org/gene/DDB_G0283125	0.062254	0.041916	0.385023
DDB_G0268996	http://dictybase.org/gene/DDB_G0268996	0.062235	0.171657	0.479499
hspE-2	http://dictybase.org/gene/DDB_G0273623	0.062234	0.031936	0.361464
DDB_G0281763	http://dictybase.org/gene/DDB_G0281763	0.062229	0.021956	0.335971
aifB	http://dictybase.org/gene/DDB_G0285005	0.06222	0.001996	0.119472
DDB_G0280159	http://dictybase.org/gene/DDB_G0280159	0.062217	0.171657	0.479499
ercc1	http://dictybase.org/gene/DDB_G0267682	0.062167	0.031936	0.361464
DDB_G0289269	http://dictybase.org/gene/DDB_G0289269	0.062165	0.151697	0.466919
DDB_G0280803	http://dictybase.org/gene/DDB_G0280803	0.062161	0.011976	0.278193
mybZ	http://dictybase.org/gene/DDB_G0284103	0.062155	0.051896	0.401835
nagA	http://dictybase.org/gene/DDB_G0287033	0.062152	0.111776	0.43735
DDB_G0291137	http://dictybase.org/gene/DDB_G0291137	0.062146	0.001996	0.119472
DDB_G0273459	http://dictybase.org/gene/DDB_G0273459	0.062115	0.101796	0.428249
DDB_G0294553	http://dictybase.org/gene/DDB_G0294553	0.062081	0.061876	0.411303
ponC3	http://dictybase.org/gene/DDB_G0286721	0.062081	0.171657	0.479499
DDB_G0283973	http://dictybase.org/gene/DDB_G0283973	0.062048	0.091816	0.425182
DDB_G0291139	http://dictybase.org/gene/DDB_G0291139	0.062031	0.011976	0.278193
DDB_G0277415	http://dictybase.org/gene/DDB_G0277415	0.062023	0.031936	0.361464
lvsG	http://dictybase.org/gene/DDB_G0268088	0.062005	0.191617	0.492298
pex2	http://dictybase.org/gene/DDB_G0272234	0.062005	0.061876	0.411303
DDB_G0277993	http://dictybase.org/gene/DDB_G0277993	0.061995	0.071856	0.418802
DDB_G0291364	http://dictybase.org/gene/DDB_G0291364	0.061922	0.041916	0.385023
DDB_G0276531	http://dictybase.org/gene/DDB_G0276531	0.061911	0.001996	0.119472
alg9	http://dictybase.org/gene/DDB_G0279349	0.061908	0.041916	0.385023
DDB_G0289607	http://dictybase.org/gene/DDB_G0289607	0.061895	0.011976	0.278193
DDB_G0282683	http://dictybase.org/gene/DDB_G0282683	0.061877	0.151697	0.466919
samkE_ps1	http://dictybase.org/gene/DDB_G0283165	0.061856	0.031936	0.361464
DDB_G0277663	http://dictybase.org/gene/DDB_G0277663	0.06182	0.171657	0.479499
cpnA	http://dictybase.org/gene/DDB_G0293008	0.061815	0.081836	0.422442
DDB_G0277575	http://dictybase.org/gene/DDB_G0277575	0.061799	0.121756	0.445769
DDB_G0270634	http://dictybase.org/gene/DDB_G0270634	0.061795	0.051896	0.401835
DDB_G0268090	http://dictybase.org/gene/DDB_G0268090	0.06177	0.041916	0.385023
DDB_G0267500	http://dictybase.org/gene/DDB_G0267500	0.06176	0.191617	0.492298
DDB_G0291480	http://dictybase.org/gene/DDB_G0291480	0.061757	0.061876	0.411303
tacA	http://dictybase.org/gene/DDB_G0291342	0.061703	0.091816	0.425182
DDB_G0288265	http://dictybase.org/gene/DDB_G0288265	0.061646	0.131737	0.452811
DDB_G0276057	http://dictybase.org/gene/DDB_G0276057	0.061606	0.011976	0.278193
DDB_G0275613	http://dictybase.org/gene/DDB_G0275613	0.061593	0.021956	0.335971
DDB_G0278833	http://dictybase.org/gene/DDB_G0278833	0.061575	0.011976	0.278193
rliA	http://dictybase.org/gene/DDB_G0272783	0.061555	0.141717	0.459848
sibE	http://dictybase.org/gene/DDB_G0288239	0.061546	0.051896	0.401835
aass	http://dictybase.org/gene/DDB_G0284835	0.061545	0.181637	0.485157
DDB_G0285707	http://dictybase.org/gene/DDB_G0285707	0.061538	0.021956	0.335971
DDB_G0281351	http://dictybase.org/gene/DDB_G0281351	0.061529	0.201597	0.498339
DDB_G0276293	http://dictybase.org/gene/DDB_G0276293	0.061526	0.111776	0.43735
DDB_G0274351	http://dictybase.org/gene/DDB_G0274351	0.061505	0.051896	0.401835
DDB_G0277473	http://dictybase.org/gene/DDB_G0277473	0.061419	0.131737	0.452811
fam40	http://dictybase.org/gene/DDB_G0288685	0.061405	0.031936	0.361464
DDB_G0269512	http://dictybase.org/gene/DDB_G0269512	0.061392	0.161677	0.472439
DDB_G0271812	http://dictybase.org/gene/DDB_G0271812	0.061382	0.141717	0.459848
med4	http://dictybase.org/gene/DDB_G0292608	0.061378	0.031936	0.361464
DDB_G0280737_ps	http://dictybase.org/gene/DDB_G0280737	0.061358	0.011976	0.278193
DDB_G0272282	http://dictybase.org/gene/DDB_G0272282	0.061342	0.031936	0.361464
DDB_G0275647	http://dictybase.org/gene/DDB_G0275647	0.061341	0.011976	0.278193
DDB_G0277255	http://dictybase.org/gene/DDB_G0277255	0.061312	0.011976	0.278193
rad6	http://dictybase.org/gene/DDB_G0275787	0.061304	0.061876	0.411303
commd3	http://dictybase.org/gene/DDB_G0283795	0.061294	0.201597	0.498339
DDB_G0269440	http://dictybase.org/gene/DDB_G0269440	0.061246	0.001996	0.119472
xrcc1	http://dictybase.org/gene/DDB_G0275653	0.061244	0.031936	0.361464
hspG12	http://dictybase.org/gene/DDB_G0277491	0.061242	0.031936	0.361464
DDB_G0267756	http://dictybase.org/gene/DDB_G0267756	0.061222	0.141717	0.459848
DDB_G0283269	http://dictybase.org/gene/DDB_G0283269	0.061215	0.051896	0.401835
rpa49	http://dictybase.org/gene/DDB_G0290909	0.061189	0.091816	0.425182
myoD	http://dictybase.org/gene/DDB_G0275447	0.061166	0.091816	0.425182
pARTf	http://dictybase.org/gene/DDB_G0274389	0.061162	0.031936	0.361464
hibch	http://dictybase.org/gene/DDB_G0267536	0.061144	0.001996	0.119472
sgmD	http://dictybase.org/gene/DDB_G0268330	0.061121	0.171657	0.479499
DDB_G0285347	http://dictybase.org/gene/DDB_G0285347	0.061083	0.051896	0.401835
pyr56	http://dictybase.org/gene/DDB_G0280041	0.061072	0.101796	0.428249
DDB_G0274465	http://dictybase.org/gene/DDB_G0274465	0.06107	0.191617	0.492298
DDB_G0287189	http://dictybase.org/gene/DDB_G0287189	0.061066	0.171657	0.479499
mrpl6	http://dictybase.org/gene/DDB_G0294038	0.061063	0.021956	0.335971
nudt19	http://dictybase.org/gene/DDB_G0290277	0.061022	0.031936	0.361464
DDB_G0273813	http://dictybase.org/gene/DDB_G0273813	0.061002	0.051896	0.401835
litaf	http://dictybase.org/gene/DDB_G0289149	0.060975	0.011976	0.278193
DDB_G0268140	http://dictybase.org/gene/DDB_G0268140	0.060968	0.161677	0.472439
rsmM	http://dictybase.org/gene/DDB_G0292300	0.060921	0.161677	0.472439
DDB_G0289041	http://dictybase.org/gene/DDB_G0289041	0.060851	0.041916	0.385023
fdfT	http://dictybase.org/gene/DDB_G0292072	0.060821	0.071856	0.418802
DDB_G0270390	http://dictybase.org/gene/DDB_G0270390	0.060816	0.191617	0.492298
dymA	http://dictybase.org/gene/DDB_G0277849	0.060778	0.241517	0.500998
DDB_G0275873	http://dictybase.org/gene/DDB_G0275873	0.06076	0.061876	0.411303
snrpD2	http://dictybase.org/gene/DDB_G0285395	0.060742	0.071856	0.418802
DDB_G0270738	http://dictybase.org/gene/DDB_G0270738	0.060735	0.031936	0.361464
rsmA	http://dictybase.org/gene/DDB_G0283547	0.060699	0.081836	0.422442
DDB_G0276873	http://dictybase.org/gene/DDB_G0276873	0.060697	0.031936	0.361464
DDB_G0270062	http://dictybase.org/gene/DDB_G0270062	0.060665	0.161677	0.472439
DDB_G0268848	http://dictybase.org/gene/DDB_G0268848	0.060649	0.051896	0.401835
DDB_G0293570	http://dictybase.org/gene/DDB_G0293570	0.060637	0.041916	0.385023
DDB_G0289583	http://dictybase.org/gene/DDB_G0289583	0.060616	0.041916	0.385023
DDB_G0294603	http://dictybase.org/gene/DDB_G0294603	0.060584	0.011976	0.278193
DDB_G0289111	http://dictybase.org/gene/DDB_G0289111	0.060555	0.021956	0.335971
gpaA	http://dictybase.org/gene/DDB_G0283349	0.060532	0.301397	0.500998
arpF	http://dictybase.org/gene/DDB_G0287007	0.060529	0.081836	0.422442
hprT	http://dictybase.org/gene/DDB_G0285193	0.060517	0.121756	0.445769
dolpp1	http://dictybase.org/gene/DDB_G0274591	0.060482	0.101796	0.428249
cct4	http://dictybase.org/gene/DDB_G0292872	0.060377	0.111776	0.43735
rliF	http://dictybase.org/gene/DDB_G0288289	0.060356	0.091816	0.425182
DDB_G0278523	http://dictybase.org/gene/DDB_G0278523	0.060321	0.001996	0.119472
gdt1	http://dictybase.org/gene/DDB_G0278723	0.060303	0.081836	0.422442
DDB_G0288585	http://dictybase.org/gene/DDB_G0288585	0.060293	0.051896	0.401835
helC	http://dictybase.org/gene/DDB_G0281553	0.060282	0.011976	0.278193
fslQ	http://dictybase.org/gene/DDB_G0286609	0.06027	0.041916	0.385023
derl1	http://dictybase.org/gene/DDB_G0288833	0.06025	0.071856	0.418802
DDB_G0293504	http://dictybase.org/gene/DDB_G0293504	0.060242	0.011976	0.278193
snrpb	http://dictybase.org/gene/DDB_G0272320	0.060237	0.021956	0.335971
gloA	http://dictybase.org/gene/DDB_G0291265	0.060236	0.061876	0.411303
DDB_G0277753	http://dictybase.org/gene/DDB_G0277753	0.060177	0.031936	0.361464
cdk10	http://dictybase.org/gene/DDB_G0268480	0.060136	0.051896	0.401835
DDB_G0292178_ps	http://dictybase.org/gene/DDB_G0292178	0.06013	0.021956	0.335971
DDB_G0289023	http://dictybase.org/gene/DDB_G0289023	0.060125	0.031936	0.361464
DDB_G0286003	http://dictybase.org/gene/DDB_G0286003	0.060117	0.141717	0.459848
mmsdh	http://dictybase.org/gene/DDB_G0289085	0.060106	0.061876	0.411303
DDB_G0282263	http://dictybase.org/gene/DDB_G0282263	0.060095	0.021956	0.335971
DDB_G0277311	http://dictybase.org/gene/DDB_G0277311	0.060078	0.201597	0.498339
DDB_G0278167	http://dictybase.org/gene/DDB_G0278167	0.060048	0.061876	0.411303
lipA	http://dictybase.org/gene/DDB_G0279909	0.060046	0.161677	0.472439
cadA	http://dictybase.org/gene/DDB_G0285793	0.060036	0.191617	0.492298
DDB_G0285471	http://dictybase.org/gene/DDB_G0285471	0.060003	0.171657	0.479499
abcA6	http://dictybase.org/gene/DDB_G0291245	0.059997	0.121756	0.445769
gpbB	http://dictybase.org/gene/DDB_G0275045	0.059995	0.091816	0.425182
act7	http://dictybase.org/gene/DDB_G0280545	0.05999	0.071856	0.418802
DDB_G0284511	http://dictybase.org/gene/DDB_G0284511	0.059983	0.111776	0.43735
aqpB	http://dictybase.org/gene/DDB_G0279443	0.059978	0.141717	0.459848
DDB_G0289439	http://dictybase.org/gene/DDB_G0289439	0.059977	0.181637	0.485157
DDB_G0270436	http://dictybase.org/gene/DDB_G0270436	0.059975	0.021956	0.335971
nae1	http://dictybase.org/gene/DDB_G0287965	0.059962	0.191617	0.492298
DDB_G0268034	http://dictybase.org/gene/DDB_G0268034	0.059957	0.111776	0.43735
gtaT	http://dictybase.org/gene/DDB_G0280639	0.05993	0.021956	0.335971
DDB_G0290801	http://dictybase.org/gene/DDB_G0290801	0.05993	0.141717	0.459848
cog7	http://dictybase.org/gene/DDB_G0286705	0.059908	0.101796	0.428249
drg1	http://dictybase.org/gene/DDB_G0289317	0.059903	0.131737	0.452811
DDB_G0279497	http://dictybase.org/gene/DDB_G0279497	0.059828	0.021956	0.335971
DDB_G0290215	http://dictybase.org/gene/DDB_G0290215	0.059809	0.041916	0.385023
DDB_G0271992	http://dictybase.org/gene/DDB_G0271992	0.059808	0.001996	0.119472
erkA	http://dictybase.org/gene/DDB_G0286353	0.059807	0.051896	0.401835
tmem93	http://dictybase.org/gene/DDB_G0280399	0.05978	0.091816	0.425182
DDB_G0268948	http://dictybase.org/gene/DDB_G0268948	0.059776	0.001996	0.119472
DDB_G0272580	http://dictybase.org/gene/DDB_G0272580	0.059768	0.021956	0.335971
purL	http://dictybase.org/gene/DDB_G0288145	0.05974	0.091816	0.425182
guaD	http://dictybase.org/gene/DDB_G0277743	0.059618	0.021956	0.335971
mybD	http://dictybase.org/gene/DDB_G0287637	0.05961	0.141717	0.459848
rpc19	http://dictybase.org/gene/DDB_G0291362	0.059594	0.131737	0.452811
DDB_G0289205	http://dictybase.org/gene/DDB_G0289205	0.059589	0.011976	0.278193
DDB_G0281139	http://dictybase.org/gene/DDB_G0281139	0.059586	0.021956	0.335971
ncfA	http://dictybase.org/gene/DDB_G0288773	0.059584	0.061876	0.411303
DDB_G0275595	http://dictybase.org/gene/DDB_G0275595	0.059583	0.091816	0.425182
DDB_G0278961	http://dictybase.org/gene/DDB_G0278961	0.059551	0.061876	0.411303
maspS	http://dictybase.org/gene/DDB_G0270152	0.059544	0.121756	0.445769
xpo4	http://dictybase.org/gene/DDB_G0280907	0.059524	0.051896	0.401835
DDB_G0279539	http://dictybase.org/gene/DDB_G0279539	0.059519	0.181637	0.485157
wdr24	http://dictybase.org/gene/DDB_G0287817	0.059486	0.261477	0.500998
snf5	http://dictybase.org/gene/DDB_G0279373	0.05948	0.131737	0.452811
psmA7	http://dictybase.org/gene/DDB_G0272831	0.059466	0.131737	0.452811
DDB_G0294629	http://dictybase.org/gene/DDB_G0294629	0.059465	0.041916	0.385023
pigM	http://dictybase.org/gene/DDB_G0288899	0.05945	0.101796	0.428249
DDB_G0281185	http://dictybase.org/gene/DDB_G0281185	0.059447	0.011976	0.278193
DDB_G0267694	http://dictybase.org/gene/DDB_G0267694	0.059445	0.031936	0.361464
DDB_G0288155	http://dictybase.org/gene/DDB_G0288155	0.059412	0.141717	0.459848
DDB_G0278361_ps	http://dictybase.org/gene/DDB_G0278361	0.059352	0.031936	0.361464
DDB_G0279487	http://dictybase.org/gene/DDB_G0279487	0.059303	0.071856	0.418802
DDB_G0281981	http://dictybase.org/gene/DDB_G0281981	0.059289	0.111776	0.43735
rpb7	http://dictybase.org/gene/DDB_G0284891	0.059282	0.151697	0.466919
vps52C	http://dictybase.org/gene/DDB_G0271856	0.059269	0.251497	0.500998
ltv1	http://dictybase.org/gene/DDB_G0275601	0.05926	0.011976	0.278193
DDB_G0271334	http://dictybase.org/gene/DDB_G0271334	0.059257	0.201597	0.498339
act16	http://dictybase.org/gene/DDB_G0272248	0.05918	0.051896	0.401835
DDB_G0290027	http://dictybase.org/gene/DDB_G0290027	0.05918	0.171657	0.479499
gcvH1	http://dictybase.org/gene/DDB_G0287773	0.059178	0.081836	0.422442
DDB_G0276477	http://dictybase.org/gene/DDB_G0276477	0.059164	0.031936	0.361464
DDB_G0278373	http://dictybase.org/gene/DDB_G0278373	0.059161	0.031936	0.361464
mrps4	http://dictybase.org/gene/DDB_G0294046	0.059147	0.051896	0.401835
DDB_G0292430	http://dictybase.org/gene/DDB_G0292430	0.059092	0.031936	0.361464
DDB_G0278987	http://dictybase.org/gene/DDB_G0278987	0.059085	0.141717	0.459848
DDB_G0268970	http://dictybase.org/gene/DDB_G0268970	0.059015	0.001996	0.119472
ogdh	http://dictybase.org/gene/DDB_G0288127	0.058972	0.071856	0.418802
DDB_G0270408	http://dictybase.org/gene/DDB_G0270408	0.05895	0.001996	0.119472
rbbE	http://dictybase.org/gene/DDB_G0285847	0.058908	0.051896	0.401835
4cl1	http://dictybase.org/gene/DDB_G0284831	0.058888	0.081836	0.422442
qpct	http://dictybase.org/gene/DDB_G0293986	0.058861	0.041916	0.385023
DDB_G0273189	http://dictybase.org/gene/DDB_G0273189	0.058823	0.161677	0.472439
dnpep	http://dictybase.org/gene/DDB_G0286149	0.058814	0.151697	0.466919
DDB_G0274187	http://dictybase.org/gene/DDB_G0274187	0.0588	0.171657	0.479499
DDB_G0295767	http://dictybase.org/gene/DDB_G0295767	0.058774	0.021956	0.335971
chid1	http://dictybase.org/gene/DDB_G0290417	0.058758	0.191617	0.492298
DDB_G0276913	http://dictybase.org/gene/DDB_G0276913	0.05875	0.021956	0.335971
omt9	http://dictybase.org/gene/DDB_G0289823	0.058722	0.181637	0.485157
DDB_G0272396	http://dictybase.org/gene/DDB_G0272396	0.058691	0.031936	0.361464
cox10	http://dictybase.org/gene/DDB_G0288169	0.058686	0.041916	0.385023
DDB_G0273485	http://dictybase.org/gene/DDB_G0273485	0.058685	0.021956	0.335971
DDB_G0284219	http://dictybase.org/gene/DDB_G0284219	0.058675	0.021956	0.335971
DDB_G0285613	http://dictybase.org/gene/DDB_G0285613	0.058585	0.001996	0.119472
csn2	http://dictybase.org/gene/DDB_G0289361	0.058582	0.091816	0.425182
ublcp1-2	http://dictybase.org/gene/DDB_G0273861	0.058582	0.001996	0.119472
med8	http://dictybase.org/gene/DDB_G0293824	0.058564	0.031936	0.361464
DDB_G0276347	http://dictybase.org/gene/DDB_G0276347	0.05856	0.021956	0.335971
xpo7	http://dictybase.org/gene/DDB_G0291986	0.058542	0.041916	0.385023
gtaW	http://dictybase.org/gene/DDB_G0286839	0.058527	0.061876	0.411303
timm16	http://dictybase.org/gene/DDB_G0282195	0.058509	0.151697	0.466919
sodB	http://dictybase.org/gene/DDB_G0283021	0.058501	0.181637	0.485157
DDB_G0291828	http://dictybase.org/gene/DDB_G0291828	0.058484	0.101796	0.428249
cct8	http://dictybase.org/gene/DDB_G0276233	0.058479	0.091816	0.425182
DDB_G0275165	http://dictybase.org/gene/DDB_G0275165	0.058459	0.041916	0.385023
DDB_G0288931	http://dictybase.org/gene/DDB_G0288931	0.058454	0.031936	0.361464
DDB_G0276255	http://dictybase.org/gene/DDB_G0276255	0.058393	0.001996	0.119472
DDB_G0288109	http://dictybase.org/gene/DDB_G0288109	0.058383	0.221557	0.500998
DDB_G0285819_ps	http://dictybase.org/gene/DDB_G0285819	0.058364	0.041916	0.385023
DDB_G0275739	http://dictybase.org/gene/DDB_G0275739	0.058358	0.171657	0.479499
scfd1	http://dictybase.org/gene/DDB_G0288719	0.058318	0.191617	0.492298
DDB_G0270156	http://dictybase.org/gene/DDB_G0270156	0.0583	0.011976	0.278193
racE	http://dictybase.org/gene/DDB_G0280975	0.058223	0.241517	0.500998
DDB_G0290205	http://dictybase.org/gene/DDB_G0290205	0.058199	0.181637	0.485157
masA	http://dictybase.org/gene/DDB_G0275887	0.058191	0.171657	0.479499
DDB_G0274429	http://dictybase.org/gene/DDB_G0274429	0.058153	0.051896	0.401835
DDB_G0293128	http://dictybase.org/gene/DDB_G0293128	0.058144	0.161677	0.472439
DDB_G0273785	http://dictybase.org/gene/DDB_G0273785	0.058132	0.001996	0.119472
idhB	http://dictybase.org/gene/DDB_G0293872	0.058111	0.081836	0.422442
gpt2	http://dictybase.org/gene/DDB_G0270528	0.058087	0.081836	0.422442
DDB_G0270376	http://dictybase.org/gene/DDB_G0270376	0.058063	0.041916	0.385023
cutA	http://dictybase.org/gene/DDB_G0283621	0.058043	0.121756	0.445769
DDB_G0277421	http://dictybase.org/gene/DDB_G0277421	0.058033	0.041916	0.385023
DDB_G0278107	http://dictybase.org/gene/DDB_G0278107	0.058029	0.061876	0.411303
DDB_G0269942	http://dictybase.org/gene/DDB_G0269942	0.05802	0.191617	0.492298
DDB_G0286307	http://dictybase.org/gene/DDB_G0286307	0.058011	0.201597	0.498339
DDB_G0281065	http://dictybase.org/gene/DDB_G0281065	0.05799	0.001996	0.119472
DDB_G0280117	http://dictybase.org/gene/DDB_G0280117	0.057972	0.011976	0.278193
DDB_G0284115	http://dictybase.org/gene/DDB_G0284115	0.057969	0.191617	0.492298
DDB_G0288051	http://dictybase.org/gene/DDB_G0288051	0.057955	0.181637	0.485157
DDB_G0273467	http://dictybase.org/gene/DDB_G0273467	0.057945	0.191617	0.492298
pepD	http://dictybase.org/gene/DDB_G0269382	0.057891	0.131737	0.452811
pdhA	http://dictybase.org/gene/DDB_G0292994	0.057854	0.111776	0.43735
med7	http://dictybase.org/gene/DDB_G0269568	0.057828	0.061876	0.411303
alg1	http://dictybase.org/gene/DDB_G0286011	0.057813	0.051896	0.401835
ctnB	http://dictybase.org/gene/DDB_G0279797	0.057758	0.021956	0.335971
DDB_G0269436	http://dictybase.org/gene/DDB_G0269436	0.057733	0.031936	0.361464
DDB_G0281287	http://dictybase.org/gene/DDB_G0281287	0.057697	0.171657	0.479499
DDB_G0291732	http://dictybase.org/gene/DDB_G0291732	0.057673	0.121756	0.445769
prfB	http://dictybase.org/gene/DDB_G0288835	0.057671	0.011976	0.278193
psmA2	http://dictybase.org/gene/DDB_G0292122	0.057633	0.041916	0.385023
DDB_G0288763	http://dictybase.org/gene/DDB_G0288763	0.057623	0.021956	0.335971
gtpbp1	http://dictybase.org/gene/DDB_G0292538	0.0576	0.011976	0.278193
purD	http://dictybase.org/gene/DDB_G0290121	0.057578	0.141717	0.459848
DDB_G0275371	http://dictybase.org/gene/DDB_G0275371	0.057574	0.001996	0.119472
mlcD	http://dictybase.org/gene/DDB_G0277917	0.057503	0.071856	0.418802
DDB_G0268484_ps	http://dictybase.org/gene/DDB_G0268484	0.057492	0.011976	0.278193
mcfX	http://dictybase.org/gene/DDB_G0276933	0.05748	0.161677	0.472439
mlcB	http://dictybase.org/gene/DDB_G0290077	0.05748	0.051896	0.401835
DDB_G0275179	http://dictybase.org/gene/DDB_G0275179	0.057467	0.231537	0.500998
DDB_G0287763	http://dictybase.org/gene/DDB_G0287763	0.057452	0.051896	0.401835
dgtB	http://dictybase.org/gene/DDB_G0286519	0.057448	0.181637	0.485157
dicA	http://dictybase.org/gene/DDB_G0280849	0.057421	0.051896	0.401835
DDB_G0284515	http://dictybase.org/gene/DDB_G0284515	0.057398	0.071856	0.418802
hydA	http://dictybase.org/gene/DDB_G0290479	0.05739	0.131737	0.452811
capB	http://dictybase.org/gene/DDB_G0277501	0.057378	0.031936	0.361464
DDB_G0271086	http://dictybase.org/gene/DDB_G0271086	0.05736	0.161677	0.472439
DDB_G0279647	http://dictybase.org/gene/DDB_G0279647	0.057325	0.021956	0.335971
DDB_G0278333	http://dictybase.org/gene/DDB_G0278333	0.057324	0.101796	0.428249
DDB_G0286277	http://dictybase.org/gene/DDB_G0286277	0.057311	0.051896	0.401835
DG1112	http://dictybase.org/gene/DDB_G0276463	0.057302	0.221557	0.500998
glud1	http://dictybase.org/gene/DDB_G0287469	0.057266	0.061876	0.411303
DDB_G0290427	http://dictybase.org/gene/DDB_G0290427	0.057265	0.101796	0.428249
DDB_G0284243	http://dictybase.org/gene/DDB_G0284243	0.057246	0.031936	0.361464
DDB_G0287831	http://dictybase.org/gene/DDB_G0287831	0.057231	0.011976	0.278193
DDB_G0281559	http://dictybase.org/gene/DDB_G0281559	0.057223	0.031936	0.361464
DDB_G0278393	http://dictybase.org/gene/DDB_G0278393	0.057193	0.051896	0.401835
[truncated: 10,870 more rows]
