# Supplementary material
Source: publisher figshare collection journal article supplement (https://plos.figshare.com/articles/dataset/_/1575190)
Supplement: Supplementary file 1 [file 1 › S2_Fig.pdf]

**a** Protein-protein interaction network from the STRING database

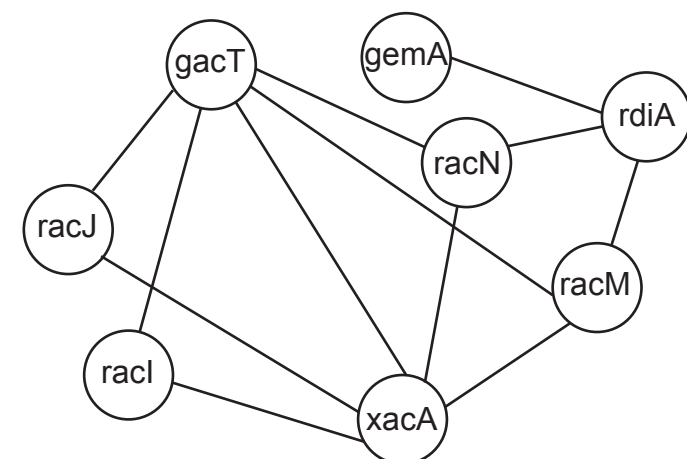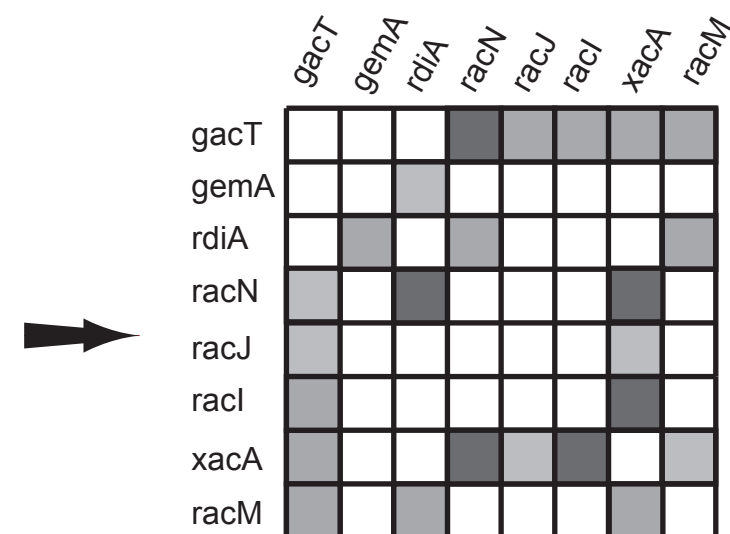

**b** Part of the N-Glycan biosynthesis pathway

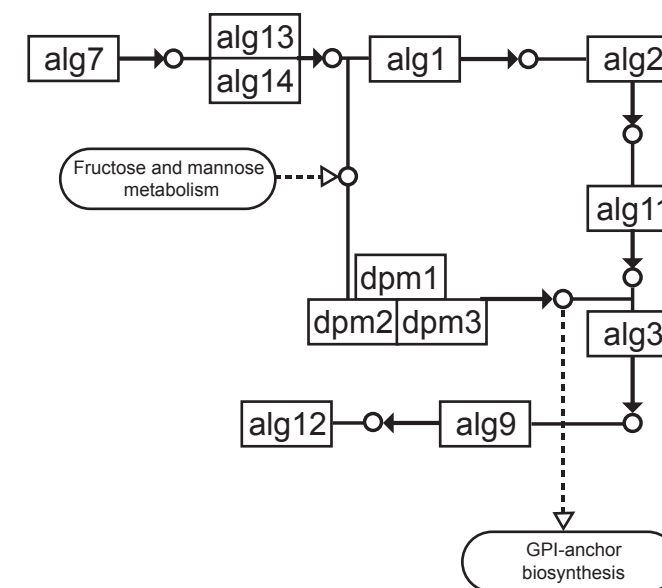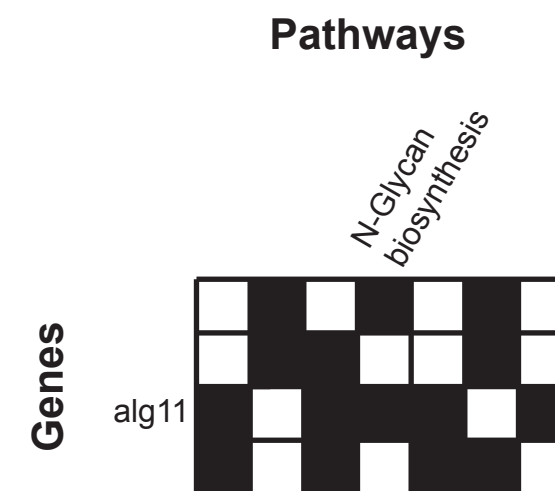

## C

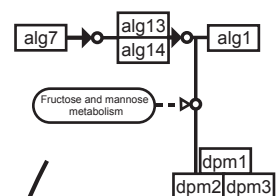

Part of the N-Glycan biosynthesis pathway

## Ontology terms

Protein N-linked glycosylation (GO:0006487)

## Orthology

Dolichol kinase (K00902)  
Alpha-mannosidase II (K01231)  
Oligosaccharyltransferase complex (K12668)

## Ontology

GO:0004168  
GO:0004572  
GO:0008250

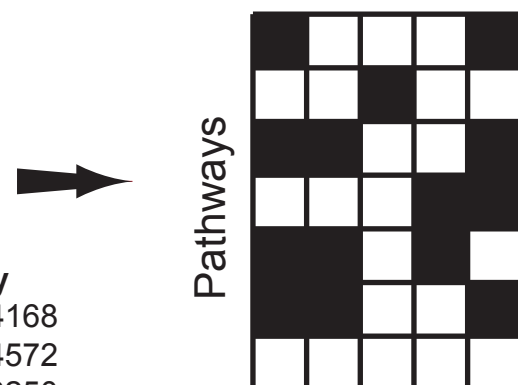

**d**

Liu *et al.*, 2014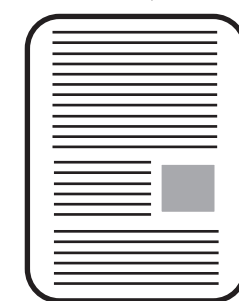

## MeSH terms

- Cell separation
- Cytoplasmic vesicles/metabolism
- Ethidium/metabolism
- Immunity/innate
- Mutation
- Phagocytes/cytology
- Phagocytes/immunology\*
- Phagocytosis\*

Liu *et al.*, 2014

## Literature

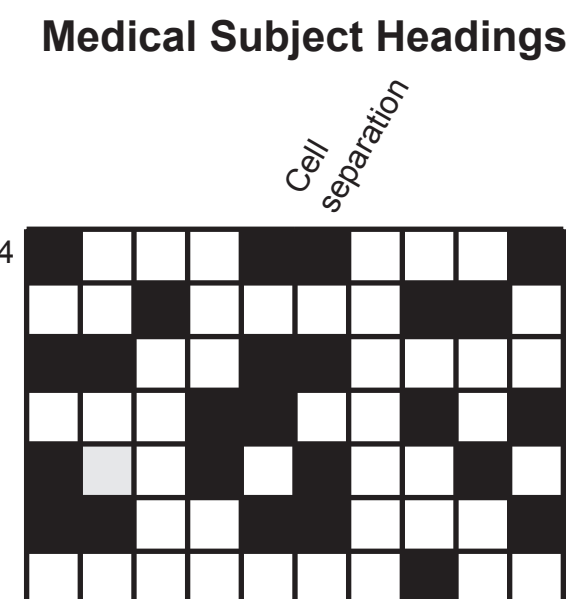

**e** Part of the Gene Ontology graph

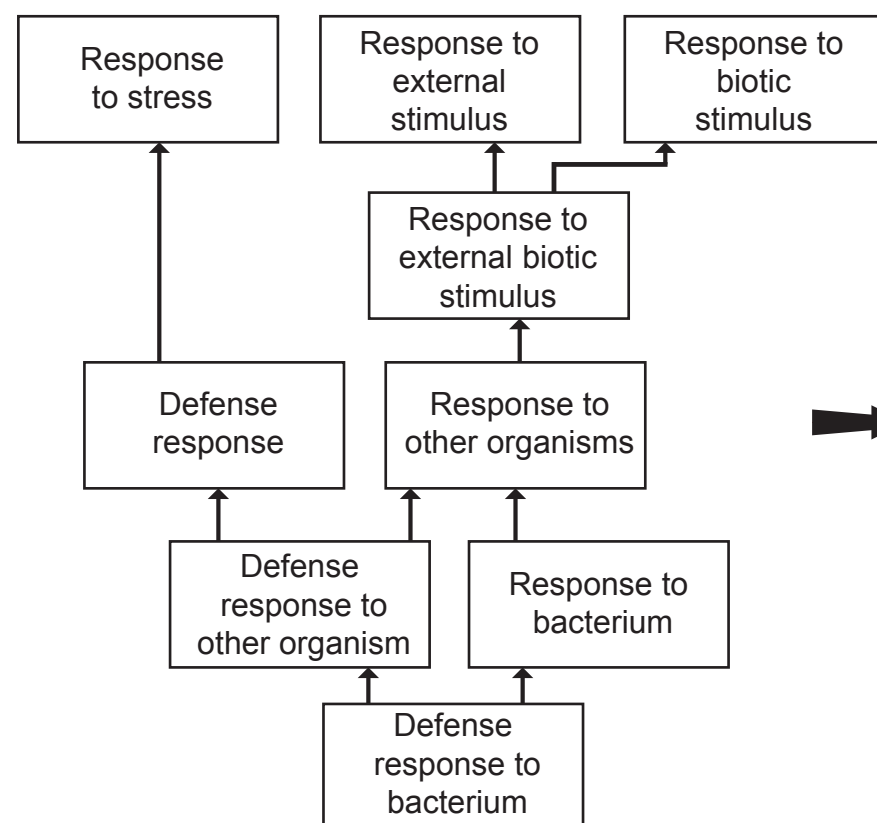

## Gene Ontology terms

### Gene Ontology terms

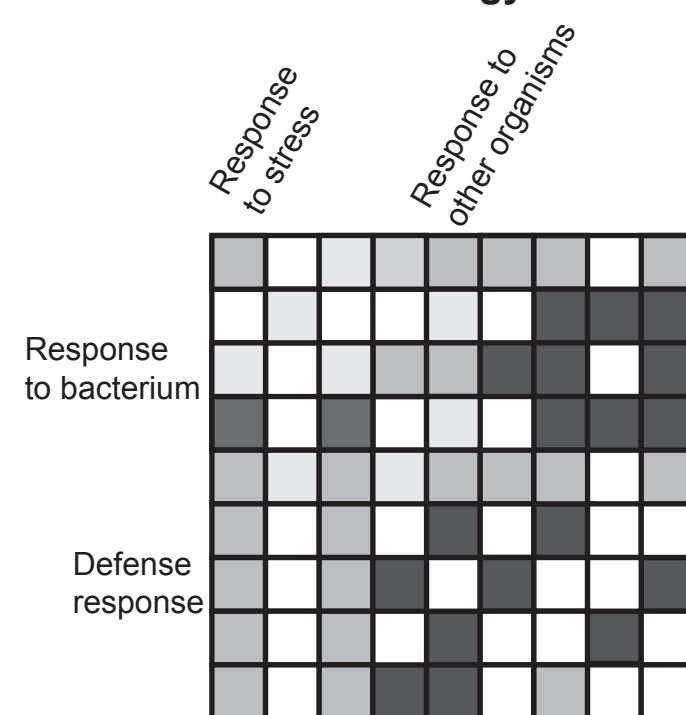**f**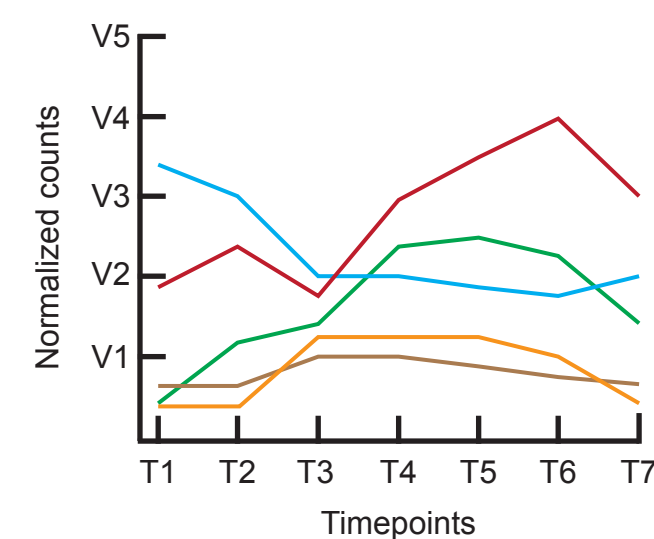

Experiments

T1 T2 T3 T4 T5 T6 T7

Genes

| Genes           | T1  | T2  | T3  | T4 | T5  | T6  | T7  |
|-----------------|-----|-----|-----|----|-----|-----|-----|
| Gene 1 (Red)    | 0   | 100 | 0   | 0  | 100 | 0   | 100 |
| Gene 2 (Green)  | 100 | 0   | 100 | 0  | 0   | 100 | 100 |
| Gene 3 (Blue)   | 0   | 0   | 0   | 0  | 100 | 100 | 0   |
| Gene 4 (Orange) | 0   | 100 | 100 | 0  | 0   | 0   | 0   |
| Gene 5 (Brown)  | 100 | 0   | 0   | 0  | 100 | 100 | 0   |
