# Supplementary material
Source: publisher figshare collection journal article supplement (https://plos.figshare.com/articles/dataset/_/1575190)
Supplement: Supplementary file 1 [file 1 › S2_Table.xlsx]

## Sheet: prioritization_R_500-dictybase.
Supplementary Table 2: Gene prioritization list for a subset of genes from the DictyBase.
Gene	DictyBase URL	Score	P-value	FDR-value	Comment
cf50-1	http://dictybase.org/gene/DDB_G0273175	0.229014	0.011976	0.27819	Validated prediction: defective growth in Gram- bacteria.
smlA	http://dictybase.org/gene/DDB_G0287587	0.201641	0.011976	0.27819	Validated prediction: defective growth in Gram- bacteria.
acbA	http://dictybase.org/gene/DDB_G0270658	0.196292	0.011976	0.27819	Validated prediction: defective growth in Gram- bacteria.
pirA	http://dictybase.org/gene/DDB_G0287855	0.15373	0.021956	0.33597
rps10	http://dictybase.org/gene/DDB_G0286117	0.148306	0.011976	0.27819
abpC	http://dictybase.org/gene/DDB_G0269100	0.139264	0.011976	0.27819	Validated prediction: defective growth in Gram- bacteria.
tirA	http://dictybase.org/gene/DDB_G0289237	0.13903	0.031936	0.36146
DDB_G0272184	http://dictybase.org/gene/DDB_G0272184	0.134014	0.001996	0.11947
pikB	http://dictybase.org/gene/DDB_G0283081	0.133828	0.031936	0.36146	Validated prediction: defective growth in Gram- bacteria.
vps46	http://dictybase.org/gene/DDB_G0267394	0.13039	0.041916	0.38502
pikA	http://dictybase.org/gene/DDB_G0278727	0.12479	0.041916	0.38502	Validated prediction: defective growth in Gram- bacteria.
swp1	http://dictybase.org/gene/DDB_G0289479	0.121346	0.021956	0.33597
ggtA	http://dictybase.org/gene/DDB_G0274103	0.120861	0.071856	0.4188
DDB_G0288519	http://dictybase.org/gene/DDB_G0288519	0.119344	0.041916	0.38502
pten	http://dictybase.org/gene/DDB_G0286557	0.1174	0.111776	0.43735	Validated prediction: defective growth in Gram- bacteria.
DDB_G0288551	http://dictybase.org/gene/DDB_G0288551	0.114848	0.021956	0.33597
tra2	http://dictybase.org/gene/DDB_G0278349	0.113054	0.021956	0.33597
DDB_G0286429	http://dictybase.org/gene/DDB_G0286429	0.111506	0.071856	0.4188
dscA-1	http://dictybase.org/gene/DDB_G0273063	0.111391	0.041916	0.38502
cinC	http://dictybase.org/gene/DDB_G0287685	0.110622	0.021956	0.33597
udpB	http://dictybase.org/gene/DDB_G0280985	0.107192	0.071856	0.4188
sfbA	http://dictybase.org/gene/DDB_G0274107	0.106891	0.051896	0.40183
modA	http://dictybase.org/gene/DDB_G0269154	0.104876	0.091816	0.42518	Validated prediction: defective growth in Gram- bacteria.
DDB_G0287399	http://dictybase.org/gene/DDB_G0287399	0.102797	0.061876	0.4113
prmt5	http://dictybase.org/gene/DDB_G0287327	0.101623	0.001996	0.11947
dpoA	http://dictybase.org/gene/DDB_G0274387	0.098703	0.011976	0.27819
DDB_G0278663	http://dictybase.org/gene/DDB_G0278663	0.097808	0.071856	0.4188
psiP	http://dictybase.org/gene/DDB_G0280171	0.095873	0.031936	0.36146
sibC	http://dictybase.org/gene/DDB_G0288195	0.095762	0.081836	0.42244
DDB_G0291926	http://dictybase.org/gene/DDB_G0291926	0.093879	0.051896	0.40183
DDB_G0275057	http://dictybase.org/gene/DDB_G0275057	0.092748	0.081836	0.42244
DDB_G0269126	http://dictybase.org/gene/DDB_G0269126	0.092636	0.011976	0.27819
pigT	http://dictybase.org/gene/DDB_G0291490	0.088651	0.061876	0.4113
gbqA	http://dictybase.org/gene/DDB_G0280965	0.087461	0.051896	0.40183
lkhA	http://dictybase.org/gene/DDB_G0269148	0.087147	0.081836	0.42244
DDB_G0276899	http://dictybase.org/gene/DDB_G0276899	0.087097	0.041916	0.38502
empB	http://dictybase.org/gene/DDB_G0293540	0.086341	0.101796	0.42825
mekA	http://dictybase.org/gene/DDB_G0269152	0.085758	0.041916	0.38502
eif2b1	http://dictybase.org/gene/DDB_G0288961	0.085367	0.051896	0.40183
uduC	http://dictybase.org/gene/DDB_G0270726	0.084753	0.021956	0.33597
shkA	http://dictybase.org/gene/DDB_G0283267	0.083675	0.161677	0.47244
grp94	http://dictybase.org/gene/DDB_G0280057	0.083666	0.071856	0.4188
DDB_G0267848	http://dictybase.org/gene/DDB_G0267848	0.083209	0.051896	0.40183
DDB_G0290575	http://dictybase.org/gene/DDB_G0290575	0.083095	0.091816	0.42518
DDB_G0272801	http://dictybase.org/gene/DDB_G0272801	0.082964	0.051896	0.40183
DDB_G0268206	http://dictybase.org/gene/DDB_G0268206	0.082621	0.081836	0.42244
DDB_G0287825	http://dictybase.org/gene/DDB_G0287825	0.082485	0.111776	0.43735
DDB_G0279145	http://dictybase.org/gene/DDB_G0279145	0.082303	0.061876	0.4113
DDB_G0277165	http://dictybase.org/gene/DDB_G0277165	0.081915	0.031936	0.36146
cct3	http://dictybase.org/gene/DDB_G0281741	0.081822	0.061876	0.4113
DDB_G0267984	http://dictybase.org/gene/DDB_G0267984	0.081117	0.101796	0.42825
cenB	http://dictybase.org/gene/DDB_G0279151	0.080827	0.151697	0.46692
cepG	http://dictybase.org/gene/DDB_G0278809	0.07979	0.121756	0.44577
DDB_G0272614	http://dictybase.org/gene/DDB_G0272614	0.078918	0.051896	0.40183
DDB_G0268816	http://dictybase.org/gene/DDB_G0268816	0.078399	0.121756	0.44577
DDB_G0274897	http://dictybase.org/gene/DDB_G0274897	0.078251	0.121756	0.44577
DDB_G0284037	http://dictybase.org/gene/DDB_G0284037	0.078221	0.101796	0.42825
DDB_G0286239	http://dictybase.org/gene/DDB_G0286239	0.077942	0.001996	0.11947
zipA	http://dictybase.org/gene/DDB_G0286985	0.077627	0.101796	0.42825
rbsk	http://dictybase.org/gene/DDB_G0280893	0.077178	0.021956	0.33597
uduA1	http://dictybase.org/gene/DDB_G0268332	0.076989	0.061876	0.4113
sadA	http://dictybase.org/gene/DDB_G0288511	0.076732	0.131737	0.45281
DDB_G0290197	http://dictybase.org/gene/DDB_G0290197	0.07626	0.111776	0.43735
DG2033	http://dictybase.org/gene/DDB_G0278965	0.075767	0.001996	0.11947
DDB_G0273795	http://dictybase.org/gene/DDB_G0273795	0.075685	0.011976	0.27819
DDB_G0284485	http://dictybase.org/gene/DDB_G0284485	0.07519	0.111776	0.43735
DDB_G0286079	http://dictybase.org/gene/DDB_G0286079	0.074579	0.111776	0.43735
DDB_G0287153	http://dictybase.org/gene/DDB_G0287153	0.074573	0.031936	0.36146
DDB_G0267458	http://dictybase.org/gene/DDB_G0267458	0.073883	0.031936	0.36146
DDB_G0278163	http://dictybase.org/gene/DDB_G0278163	0.073809	0.031936	0.36146
ddi1	http://dictybase.org/gene/DDB_G0288187	0.073628	0.031936	0.36146
gdt6	http://dictybase.org/gene/DDB_G0270544	0.073178	0.001996	0.11947
DDB_G0270146	http://dictybase.org/gene/DDB_G0270146	0.073129	0.051896	0.40183
abkD	http://dictybase.org/gene/DDB_G0284897	0.072256	0.001996	0.11947
DDB_G0270694	http://dictybase.org/gene/DDB_G0270694	0.07219	0.181637	0.48516
DDB_G0272382	http://dictybase.org/gene/DDB_G0272382	0.072183	0.011976	0.27819
argC	http://dictybase.org/gene/DDB_G0286257	0.071786	0.151697	0.46692
DDB_G0273105	http://dictybase.org/gene/DDB_G0273105	0.071127	0.051896	0.40183
xpr1	http://dictybase.org/gene/DDB_G0285957	0.070699	0.021956	0.33597
lmpB	http://dictybase.org/gene/DDB_G0287035	0.070697	0.171657	0.4795
DDB_G0268872	http://dictybase.org/gene/DDB_G0268872	0.070578	0.021956	0.33597
DDB_G0285763	http://dictybase.org/gene/DDB_G0285763	0.070046	0.021956	0.33597
DDB_G0281861	http://dictybase.org/gene/DDB_G0281861	0.069868	0.131737	0.45281
gacV	http://dictybase.org/gene/DDB_G0293510	0.069493	0.061876	0.4113
DDB_G0279945	http://dictybase.org/gene/DDB_G0279945	0.068557	0.121756	0.44577
DDB_G0287643	http://dictybase.org/gene/DDB_G0287643	0.068407	0.031936	0.36146
rabT2	http://dictybase.org/gene/DDB_G0269262	0.068211	0.061876	0.4113
DDB_G0271120	http://dictybase.org/gene/DDB_G0271120	0.067923	0.151697	0.46692
DDB_G0269890	http://dictybase.org/gene/DDB_G0269890	0.067532	0.141717	0.45985
pakB	http://dictybase.org/gene/DDB_G0276459	0.067245	0.101796	0.42825
qtrt1	http://dictybase.org/gene/DDB_G0291802	0.067201	0.011976	0.27819
DDB_G0292058	http://dictybase.org/gene/DDB_G0292058	0.066285	0.201597	0.49834
DDB_G0268424	http://dictybase.org/gene/DDB_G0268424	0.066094	0.021956	0.33597
DDB_G0283989	http://dictybase.org/gene/DDB_G0283989	0.06568	0.181637	0.48516
adh5	http://dictybase.org/gene/DDB_G0281865	0.064804	0.011976	0.27819
DDB_G0271904	http://dictybase.org/gene/DDB_G0271904	0.064476	0.211577	0.501
DDB_G0288947	http://dictybase.org/gene/DDB_G0288947	0.064354	0.251497	0.501
DDB_G0280477	http://dictybase.org/gene/DDB_G0280477	0.063986	0.051896	0.40183
uduA2	http://dictybase.org/gene/DDB_G0267726	0.063352	0.071856	0.4188
DDB_G0267742	http://dictybase.org/gene/DDB_G0267742	0.063272	0.061876	0.4113
DDB_G0271836	http://dictybase.org/gene/DDB_G0271836	0.06313	0.031936	0.36146
DDB_G0281967	http://dictybase.org/gene/DDB_G0281967	0.063125	0.121756	0.44577
DDB_G0273459	http://dictybase.org/gene/DDB_G0273459	0.062115	0.101796	0.42825
lvsG	http://dictybase.org/gene/DDB_G0268088	0.062005	0.191617	0.4923
sibE	http://dictybase.org/gene/DDB_G0288239	0.061546	0.051896	0.40183
arpF	http://dictybase.org/gene/DDB_G0287007	0.060529	0.081836	0.42244
helC	http://dictybase.org/gene/DDB_G0281553	0.060282	0.011976	0.27819
DDB_G0282263	http://dictybase.org/gene/DDB_G0282263	0.060095	0.021956	0.33597
lipA	http://dictybase.org/gene/DDB_G0279909	0.060046	0.161677	0.47244
DDB_G0290215	http://dictybase.org/gene/DDB_G0290215	0.059809	0.041916	0.38502
DDB_G0294629	http://dictybase.org/gene/DDB_G0294629	0.059465	0.041916	0.38502
DDB_G0273189	http://dictybase.org/gene/DDB_G0273189	0.058823	0.161677	0.47244
DDB_G0288931	http://dictybase.org/gene/DDB_G0288931	0.058454	0.031936	0.36146
gtpbp1	http://dictybase.org/gene/DDB_G0292538	0.0576	0.011976	0.27819
DDB_G0278333	http://dictybase.org/gene/DDB_G0278333	0.057324	0.101796	0.42825
DG1112	http://dictybase.org/gene/DDB_G0276463	0.057302	0.221557	0.501
DDB_G0281559	http://dictybase.org/gene/DDB_G0281559	0.057223	0.031936	0.36146
iliL	http://dictybase.org/gene/DDB_G0281853	0.057154	0.021956	0.33597
abcA1	http://dictybase.org/gene/DDB_G0291994	0.056796	0.161677	0.47244
DDB_G0292652	http://dictybase.org/gene/DDB_G0292652	0.056698	0.001996	0.11947
DDB_G0271348	http://dictybase.org/gene/DDB_G0271348	0.056648	0.111776	0.43735
DDB_G0268876	http://dictybase.org/gene/DDB_G0268876	0.055872	0.031936	0.36146
DDB_G0278915	http://dictybase.org/gene/DDB_G0278915	0.055791	0.011976	0.27819
DDB_G0288161	http://dictybase.org/gene/DDB_G0288161	0.055452	0.181637	0.48516
DDB_G0269608	http://dictybase.org/gene/DDB_G0269608	0.055443	0.021956	0.33597
surf1-1	http://dictybase.org/gene/DDB_G0272889	0.055402	0.091816	0.42518
DDB_G0281925	http://dictybase.org/gene/DDB_G0281925	0.05531	0.091816	0.42518
DDB_G0288987	http://dictybase.org/gene/DDB_G0288987	0.054883	0.151697	0.46692
keaA	http://dictybase.org/gene/DDB_G0271500	0.054055	0.161677	0.47244
adprh	http://dictybase.org/gene/DDB_G0289675	0.053216	0.041916	0.38502
DDB_G0288619	http://dictybase.org/gene/DDB_G0288619	0.053091	0.011976	0.27819
DDB_G0279573	http://dictybase.org/gene/DDB_G0279573	0.052883	0.051896	0.40183
samkB	http://dictybase.org/gene/DDB_G0284859	0.052756	0.131737	0.45281
fam21	http://dictybase.org/gene/DDB_G0276221	0.052597	0.151697	0.46692
gdt9	http://dictybase.org/gene/DDB_G0278879	0.052064	0.041916	0.38502
DDB_G0282463	http://dictybase.org/gene/DDB_G0282463	0.05206	0.011976	0.27819
dhx35	http://dictybase.org/gene/DDB_G0269306	0.05181	0.031936	0.36146
DDB_G0277937	http://dictybase.org/gene/DDB_G0277937	0.051695	0.031936	0.36146
DG1098	http://dictybase.org/gene/DDB_G0293192	0.050457	0.081836	0.42244
DDB_G0278613	http://dictybase.org/gene/DDB_G0278613	0.050241	0.071856	0.4188
DDB_G0273147	http://dictybase.org/gene/DDB_G0273147	0.050219	0.211577	0.501
DDB_G0272953	http://dictybase.org/gene/DDB_G0272953	0.050116	0.081836	0.42244
DDB_G0270300	http://dictybase.org/gene/DDB_G0270300	0.049913	0.071856	0.4188
ku80	http://dictybase.org/gene/DDB_G0286303	0.049514	0.091816	0.42518
DDB_G0287735	http://dictybase.org/gene/DDB_G0287735	0.049512	0.101796	0.42825
DDB_G0273837	http://dictybase.org/gene/DDB_G0273837	0.049473	0.141717	0.45985
DDB_G0285675	http://dictybase.org/gene/DDB_G0285675	0.049012	0.051896	0.40183
gloB1	http://dictybase.org/gene/DDB_G0285717	0.048787	0.061876	0.4113
DDB_G0276029	http://dictybase.org/gene/DDB_G0276029	0.048776	0.081836	0.42244
grlO	http://dictybase.org/gene/DDB_G0271688	0.048766	0.251497	0.501
nek2	http://dictybase.org/gene/DDB_G0270814	0.048682	0.061876	0.4113
DDB_G0279115	http://dictybase.org/gene/DDB_G0279115	0.048239	0.051896	0.40183
alg3	http://dictybase.org/gene/DDB_G0268238	0.048192	0.091816	0.42518
DDB_G0291722	http://dictybase.org/gene/DDB_G0291722	0.047751	0.021956	0.33597
DDB_G0278787	http://dictybase.org/gene/DDB_G0278787	0.047481	0.041916	0.38502
drnB	http://dictybase.org/gene/DDB_G0268410	0.047421	0.071856	0.4188
mhkC	http://dictybase.org/gene/DDB_G0290687	0.047284	0.101796	0.42825
jcdF	http://dictybase.org/gene/DDB_G0290869	0.047156	0.061876	0.4113
DDB_G0285261	http://dictybase.org/gene/DDB_G0285261	0.046884	0.061876	0.4113
DDB_G0280299	http://dictybase.org/gene/DDB_G0280299	0.046859	0.051896	0.40183
DDB_G0274177	http://dictybase.org/gene/DDB_G0274177	0.046656	0.071856	0.4188
rad51-1	http://dictybase.org/gene/DDB_G0273139	0.046463	0.041916	0.38502
DDB_G0272052	http://dictybase.org/gene/DDB_G0272052	0.046206	0.101796	0.42825
DDB_G0282959	http://dictybase.org/gene/DDB_G0282959	0.045759	0.201597	0.49834
DDB_G0275015	http://dictybase.org/gene/DDB_G0275015	0.045666	0.091816	0.42518
DDB_G0273137	http://dictybase.org/gene/DDB_G0273137	0.045067	0.091816	0.42518
piaA	http://dictybase.org/gene/DDB_G0277399	0.044939	0.211577	0.501
DDB_G0273031	http://dictybase.org/gene/DDB_G0273031	0.044847	0.081836	0.42244
DDB_G0273285	http://dictybase.org/gene/DDB_G0273285	0.044621	0.191617	0.4923
DDB_G0281819	http://dictybase.org/gene/DDB_G0281819	0.044513	0.061876	0.4113
DDB_G0288521	http://dictybase.org/gene/DDB_G0288521	0.044135	0.191617	0.4923
DDB_G0280583	http://dictybase.org/gene/DDB_G0280583	0.04391	0.081836	0.42244
irlB-2	http://dictybase.org/gene/DDB_G0273857	0.043788	0.041916	0.38502
sgkB	http://dictybase.org/gene/DDB_G0284545	0.043614	0.131737	0.45281
cyp508B1	http://dictybase.org/gene/DDB_G0282419	0.043422	0.091816	0.42518
adkB	http://dictybase.org/gene/DDB_G0292730	0.043279	0.091816	0.42518
DDB_G0282121	http://dictybase.org/gene/DDB_G0282121	0.042876	0.071856	0.4188
jcdI	http://dictybase.org/gene/DDB_G0270006	0.042777	0.171657	0.4795
DDB_G0281953	http://dictybase.org/gene/DDB_G0281953	0.042375	0.171657	0.4795
DDB_G0280993	http://dictybase.org/gene/DDB_G0280993	0.042209	0.221557	0.501
dcsA	http://dictybase.org/gene/DDB_G0269124	0.041168	0.221557	0.501
DDB_G0279263	http://dictybase.org/gene/DDB_G0279263	0.040595	0.141717	0.45985
smp3	http://dictybase.org/gene/DDB_G0291660	0.040586	0.021956	0.33597
mkcA	http://dictybase.org/gene/DDB_G0285427	0.040342	0.171657	0.4795
DDB_G0293856	http://dictybase.org/gene/DDB_G0293856	0.040261	0.051896	0.40183
DDB_G0285403	http://dictybase.org/gene/DDB_G0285403	0.039947	0.091816	0.42518
DDB_G0288219	http://dictybase.org/gene/DDB_G0288219	0.039748	0.061876	0.4113
DDB_G0289231	http://dictybase.org/gene/DDB_G0289231	0.039598	0.161677	0.47244
DDB_G0280235	http://dictybase.org/gene/DDB_G0280235	0.03941	0.201597	0.49834
dhcA	http://dictybase.org/gene/DDB_G0276355	0.039234	0.231537	0.501
tpsB	http://dictybase.org/gene/DDB_G0284975	0.039086	0.091816	0.42518
DDB_G0293762	http://dictybase.org/gene/DDB_G0293762	0.039079	0.111776	0.43735
abcC9	http://dictybase.org/gene/DDB_G0285165	0.03898	0.081836	0.42244
DDB_G0274025	http://dictybase.org/gene/DDB_G0274025	0.038774	0.051896	0.40183
DDB_G0285609	http://dictybase.org/gene/DDB_G0285609	0.038769	0.131737	0.45281
rgaA	http://dictybase.org/gene/DDB_G0287585	0.038664	0.201597	0.49834
DDB_G0288943	http://dictybase.org/gene/DDB_G0288943	0.03865	0.101796	0.42825
DDB_G0279759	http://dictybase.org/gene/DDB_G0279759	0.038564	0.081836	0.42244
DDB_G0274693	http://dictybase.org/gene/DDB_G0274693	0.038534	0.041916	0.38502
DDB_G0290527	http://dictybase.org/gene/DDB_G0290527	0.038401	0.051896	0.40183
yipf1	http://dictybase.org/gene/DDB_G0281587	0.038374	0.321357	0.501
DDB_G0278177	http://dictybase.org/gene/DDB_G0278177	0.038086	0.101796	0.42825
xpo5	http://dictybase.org/gene/DDB_G0284379	0.037905	0.191617	0.4923
DDB_G0270640	http://dictybase.org/gene/DDB_G0270640	0.037704	0.131737	0.45281
plbG	http://dictybase.org/gene/DDB_G0267392	0.036958	0.231537	0.501
DDB_G0287083	http://dictybase.org/gene/DDB_G0287083	0.036806	0.081836	0.42244
chtB	http://dictybase.org/gene/DDB_G0290617	0.036794	0.211577	0.501
ap2s1	http://dictybase.org/gene/DDB_G0289721	0.036223	0.291417	0.501
phdA	http://dictybase.org/gene/DDB_G0285845	0.036202	0.201597	0.49834
DDB_G0289285	http://dictybase.org/gene/DDB_G0289285	0.036048	0.211577	0.501
DDB_G0278629	http://dictybase.org/gene/DDB_G0278629	0.035624	0.101796	0.42825
DDB_G0279939	http://dictybase.org/gene/DDB_G0279939	0.035618	0.061876	0.4113
adprt3	http://dictybase.org/gene/DDB_G0291788	0.035508	0.281437	0.501
DDB_G0276841	http://dictybase.org/gene/DDB_G0276841	0.035223	0.041916	0.38502
DDB_G0268570	http://dictybase.org/gene/DDB_G0268570	0.035158	0.061876	0.4113
DDB_G0285803	http://dictybase.org/gene/DDB_G0285803	0.035058	0.171657	0.4795
DDB_G0270048	http://dictybase.org/gene/DDB_G0270048	0.034893	0.091816	0.42518
gpi	http://dictybase.org/gene/DDB_G0283673	0.034824	0.181637	0.48516
tom7	http://dictybase.org/gene/DDB_G0282897	0.034763	0.261477	0.501
DDB_G0281843	http://dictybase.org/gene/DDB_G0281843	0.034707	0.091816	0.42518
usp12	http://dictybase.org/gene/DDB_G0290453	0.034602	0.201597	0.49834
morg1	http://dictybase.org/gene/DDB_G0289711	0.034453	0.171657	0.4795
DDB_G0273573	http://dictybase.org/gene/DDB_G0273573	0.034202	0.141717	0.45985
DDB_G0283351	http://dictybase.org/gene/DDB_G0283351	0.034153	0.121756	0.44577
DDB_G0268384	http://dictybase.org/gene/DDB_G0268384	0.033822	0.251497	0.501
pikG	http://dictybase.org/gene/DDB_G0282625	0.033793	0.231537	0.501
DDB_G0283347	http://dictybase.org/gene/DDB_G0283347	0.033725	0.081836	0.42244
sigD	http://dictybase.org/gene/DDB_G0267474	0.033611	0.161677	0.47244
DDB_G0285699	http://dictybase.org/gene/DDB_G0285699	0.03359	0.111776	0.43735
DDB_G0275005	http://dictybase.org/gene/DDB_G0275005	0.033387	0.141717	0.45985
DDB_G0272380	http://dictybase.org/gene/DDB_G0272380	0.03293	0.241517	0.501
DDB_G0288459	http://dictybase.org/gene/DDB_G0288459	0.032787	0.081836	0.42244
DDB_G0282991	http://dictybase.org/gene/DDB_G0282991	0.03276	0.161677	0.47244
myoI	http://dictybase.org/gene/DDB_G0274455	0.032174	0.161677	0.47244
DDB_G0294557	http://dictybase.org/gene/DDB_G0294557	0.031849	0.181637	0.48516
sibD	http://dictybase.org/gene/DDB_G0288197	0.031849	0.201597	0.49834
DDB_G0273201	http://dictybase.org/gene/DDB_G0273201	0.031645	0.161677	0.47244
pkd2	http://dictybase.org/gene/DDB_G0272999	0.031618	0.171657	0.4795
DDB_G0267686	http://dictybase.org/gene/DDB_G0267686	0.031574	0.161677	0.47244
DDB_G0271084	http://dictybase.org/gene/DDB_G0271084	0.031398	0.261477	0.501
DDB_G0293590	http://dictybase.org/gene/DDB_G0293590	0.031347	0.111776	0.43735
DDB_G0273515	http://dictybase.org/gene/DDB_G0273515	0.031306	0.111776	0.43735
DDB_G0271280	http://dictybase.org/gene/DDB_G0271280	0.030699	0.091816	0.42518
DDB_G0292302	http://dictybase.org/gene/DDB_G0292302	0.030665	0.141717	0.45985
DDB_G0278835	http://dictybase.org/gene/DDB_G0278835	0.030569	0.071856	0.4188
DDB_G0269796_ps	http://dictybase.org/gene/DDB_G0269796	0.0303	0.081836	0.42244
DDB_G0279291	http://dictybase.org/gene/DDB_G0279291	0.029923	0.181637	0.48516
DDB_G0279597	http://dictybase.org/gene/DDB_G0279597	0.029813	0.081836	0.42244
DDB_G0274481	http://dictybase.org/gene/DDB_G0274481	0.029667	0.151697	0.46692
xrn1	http://dictybase.org/gene/DDB_G0276137	0.029598	0.161677	0.47244
DDB_G0284625	http://dictybase.org/gene/DDB_G0284625	0.029572	0.281437	0.501
DDB_G0291632	http://dictybase.org/gene/DDB_G0291632	0.029562	0.201597	0.49834
adprt1B	http://dictybase.org/gene/DDB_G0279195	0.029465	0.101796	0.42825
DDB_G0277355	http://dictybase.org/gene/DDB_G0277355	0.029371	0.081836	0.42244
DDB_G0268806_ps	http://dictybase.org/gene/DDB_G0268806	0.029233	0.171657	0.4795
DDB_G0278585	http://dictybase.org/gene/DDB_G0278585	0.029154	0.191617	0.4923
DDB_G0274653	http://dictybase.org/gene/DDB_G0274653	0.029096	0.171657	0.4795
DDB_G0273617	http://dictybase.org/gene/DDB_G0273617	0.028611	0.001996	0.11947
DDB_G0288695	http://dictybase.org/gene/DDB_G0288695	0.028563	0.081836	0.42244
fhkB	http://dictybase.org/gene/DDB_G0280599	0.028262	0.151697	0.46692
gxcJJ	http://dictybase.org/gene/DDB_G0275679	0.028172	0.151697	0.46692
DDB_G0273597	http://dictybase.org/gene/DDB_G0273597	0.028021	0.131737	0.45281
hbx12	http://dictybase.org/gene/DDB_G0286733	0.027908	0.181637	0.48516
DDB_G0281809	http://dictybase.org/gene/DDB_G0281809	0.027881	0.231537	0.501
pakG	http://dictybase.org/gene/DDB_G0282891	0.027858	0.191617	0.4923
iliE-2	http://dictybase.org/gene/DDB_G0273915	0.027613	0.081836	0.42244
DDB_G0292094	http://dictybase.org/gene/DDB_G0292094	0.027173	0.151697	0.46692
DDB_G0269380	http://dictybase.org/gene/DDB_G0269380	0.02688	0.331337	0.501
DDB_G0275795	http://dictybase.org/gene/DDB_G0275795	0.026653	0.311377	0.501
DDB_G0285499	http://dictybase.org/gene/DDB_G0285499	0.026589	0.101796	0.42825
DDB_G0285735	http://dictybase.org/gene/DDB_G0285735	0.026403	0.171657	0.4795
elp4	http://dictybase.org/gene/DDB_G0278783	0.026387	0.201597	0.49834
DDB_G0274665_ps	http://dictybase.org/gene/DDB_G0274665	0.026101	0.231537	0.501
DDB_G0286817	http://dictybase.org/gene/DDB_G0286817	0.025964	0.261477	0.501
DDB_G0281091	http://dictybase.org/gene/DDB_G0281091	0.025807	0.201597	0.49834
DDB_G0292028	http://dictybase.org/gene/DDB_G0292028	0.025761	0.111776	0.43735
DDB_G0282971	http://dictybase.org/gene/DDB_G0282971	0.025637	0.311377	0.501
DDB_G0280383	http://dictybase.org/gene/DDB_G0280383	0.025573	0.211577	0.501
bopA	http://dictybase.org/gene/DDB_G0270830	0.025415	0.201597	0.49834
DDB_G0268232	http://dictybase.org/gene/DDB_G0268232	0.025244	0.121756	0.44577
DDB_G0289863	http://dictybase.org/gene/DDB_G0289863	0.025163	0.151697	0.46692
DDB_G0282597	http://dictybase.org/gene/DDB_G0282597	0.02513	0.231537	0.501
gxcZ	http://dictybase.org/gene/DDB_G0293928	0.024909	0.211577	0.501
DDB_G0285329	http://dictybase.org/gene/DDB_G0285329	0.024828	0.231537	0.501
DDB_G0291992	http://dictybase.org/gene/DDB_G0291992	0.024736	0.291417	0.501
psiQ	http://dictybase.org/gene/DDB_G0293288	0.024727	0.201597	0.49834
DDB_G0285605	http://dictybase.org/gene/DDB_G0285605	0.024652	0.061876	0.4113
sir2B	http://dictybase.org/gene/DDB_G0286671	0.024038	0.101796	0.42825
DDB_G0278827	http://dictybase.org/gene/DDB_G0278827	0.023976	0.231537	0.501
amdA	http://dictybase.org/gene/DDB_G0292266	0.023948	0.151697	0.46692
DDB_G0287931	http://dictybase.org/gene/DDB_G0287931	0.023906	0.241517	0.501
DDB_G0268386	http://dictybase.org/gene/DDB_G0268386	0.023807	0.191617	0.4923
tpp1	http://dictybase.org/gene/DDB_G0269914	0.023585	0.261477	0.501
dnaja1	http://dictybase.org/gene/DDB_G0291568	0.023145	0.311377	0.501
DDB_G0289629	http://dictybase.org/gene/DDB_G0289629	0.023107	0.021956	0.33597
pelo	http://dictybase.org/gene/DDB_G0280447	0.02306	0.271457	0.501
rgfA	http://dictybase.org/gene/DDB_G0272038	0.022935	0.311377	0.501
DDB_G0288007	http://dictybase.org/gene/DDB_G0288007	0.022934	0.111776	0.43735
nagB1	http://dictybase.org/gene/DDB_G0286195	0.022871	0.241517	0.501
sibB	http://dictybase.org/gene/DDB_G0288103	0.022756	0.131737	0.45281
DDB_G0276277	http://dictybase.org/gene/DDB_G0276277	0.022574	0.161677	0.47244
DDB_G0287723	http://dictybase.org/gene/DDB_G0287723	0.022517	0.161677	0.47244
tipD	http://dictybase.org/gene/DDB_G0275323	0.022191	0.191617	0.4923
DDB_G0278677	http://dictybase.org/gene/DDB_G0278677	0.021959	0.231537	0.501
DDB_G0287927	http://dictybase.org/gene/DDB_G0287927	0.021875	0.191617	0.4923
acaA	http://dictybase.org/gene/DDB_G0281545	0.021753	0.281437	0.501
DDB_G0305538	http://dictybase.org/gene/DDB_G0305538	0.021407	0.221557	0.501
psaA	http://dictybase.org/gene/DDB_G0270994	0.021407	0.121756	0.44577
vps13F	http://dictybase.org/gene/DDB_G0287055	0.021017	0.331337	0.501
DDB_G0292098	http://dictybase.org/gene/DDB_G0292098	0.021014	0.111776	0.43735
DDB_G0275747	http://dictybase.org/gene/DDB_G0275747	0.020738	0.141717	0.45985
DDB_G0283295	http://dictybase.org/gene/DDB_G0283295	0.020586	0.291417	0.501
sibA	http://dictybase.org/gene/DDB_G0287363	0.020097	0.131737	0.45281
DDB_G0278919	http://dictybase.org/gene/DDB_G0278919	0.020044	0.311377	0.501
DDB_G0268902	http://dictybase.org/gene/DDB_G0268902	0.019955	0.261477	0.501
DDB_G0277661	http://dictybase.org/gene/DDB_G0277661	0.019654	0.291417	0.501
DDB_G0273451	http://dictybase.org/gene/DDB_G0273451	0.019613	0.271457	0.501
DDB_G0286091	http://dictybase.org/gene/DDB_G0286091	0.019553	0.291417	0.501
DDB_G0278761	http://dictybase.org/gene/DDB_G0278761	0.019417	0.281437	0.501
DDB_G0275671	http://dictybase.org/gene/DDB_G0275671	0.019374	0.271457	0.501
DDB_G0293078	http://dictybase.org/gene/DDB_G0293078	0.018893	0.231537	0.501
DDB_G0284899	http://dictybase.org/gene/DDB_G0284899	0.01876	0.331337	0.501
DDB_G0292132	http://dictybase.org/gene/DDB_G0292132	0.018733	0.191617	0.4923
surf1-2	http://dictybase.org/gene/DDB_G0274001	0.018661	0.211577	0.501
DDB_G0279163	http://dictybase.org/gene/DDB_G0279163	0.018404	0.251497	0.501
DDB_G0288963	http://dictybase.org/gene/DDB_G0288963	0.018278	0.221557	0.501
DDB_G0268428	http://dictybase.org/gene/DDB_G0268428	0.018142	0.141717	0.45985
DDB_G0293730	http://dictybase.org/gene/DDB_G0293730	0.018012	0.221557	0.501
cfr_ps2	http://dictybase.org/gene/DDB_G0290269	0.017935	0.101796	0.42825
sigE	http://dictybase.org/gene/DDB_G0277921	0.017926	0.181637	0.48516
DDB_G0270872_ps	http://dictybase.org/gene/DDB_G0270872	0.017901	0.281437	0.501
DDB_G0276263	http://dictybase.org/gene/DDB_G0276263	0.017825	0.241517	0.501
DDB_G0270724_ps	http://dictybase.org/gene/DDB_G0270724	0.017817	0.201597	0.49834
DDB_G0276497	http://dictybase.org/gene/DDB_G0276497	0.01728	0.231537	0.501
DDB_G0268808	http://dictybase.org/gene/DDB_G0268808	0.017158	0.251497	0.501
DDB_G0292756	http://dictybase.org/gene/DDB_G0292756	0.01713	0.281437	0.501
DDB_G0293550	http://dictybase.org/gene/DDB_G0293550	0.017076	0.161677	0.47244
xacC	http://dictybase.org/gene/DDB_G0285391	0.016927	0.201597	0.49834
DDB_G0273547	http://dictybase.org/gene/DDB_G0273547	0.016883	0.141717	0.45985
DDB_G0273745	http://dictybase.org/gene/DDB_G0273745	0.016794	0.251497	0.501
yelA	http://dictybase.org/gene/DDB_G0280047	0.01674	0.291417	0.501
DDB_G0290471	http://dictybase.org/gene/DDB_G0290471	0.016727	0.221557	0.501
DDB_G0292988	http://dictybase.org/gene/DDB_G0292988	0.016655	0.261477	0.501
yakA	http://dictybase.org/gene/DDB_G0283605	0.016553	0.211577	0.501
DDB_G0281349_ps	http://dictybase.org/gene/DDB_G0281349	0.016469	0.301397	0.501
tgrS1	http://dictybase.org/gene/DDB_G0271598	0.016184	0.221557	0.501
DDB_G0272108	http://dictybase.org/gene/DDB_G0272108	0.01618	0.311377	0.501
DDB_G0287621	http://dictybase.org/gene/DDB_G0287621	0.016172	0.181637	0.48516
malA	http://dictybase.org/gene/DDB_G0272524	0.015791	0.151697	0.46692
rpa43	http://dictybase.org/gene/DDB_G0268198	0.015521	0.211577	0.501
DDB_G0270506	http://dictybase.org/gene/DDB_G0270506	0.015472	0.261477	0.501
tipA	http://dictybase.org/gene/DDB_G0281561	0.015401	0.241517	0.501
DDB_G0278143	http://dictybase.org/gene/DDB_G0278143	0.015285	0.241517	0.501
usp39	http://dictybase.org/gene/DDB_G0278929	0.015264	0.351297	0.501
DDB_G0286177_ps	http://dictybase.org/gene/DDB_G0286177	0.015242	0.271457	0.501
ppan	http://dictybase.org/gene/DDB_G0285515	0.015221	0.141717	0.45985
cofD-1	http://dictybase.org/gene/DDB_G0272646	0.015107	0.301397	0.501
gbpC	http://dictybase.org/gene/DDB_G0291079	0.014882	0.171657	0.4795
epnA_ps1	http://dictybase.org/gene/DDB_G0271978	0.014453	0.261477	0.501
ndm	http://dictybase.org/gene/DDB_G0272368	0.014448	0.431138	0.501
DDB_G0273633	http://dictybase.org/gene/DDB_G0273633	0.014267	0.081836	0.42244
chtC	http://dictybase.org/gene/DDB_G0290959	0.013898	0.271457	0.501
manF	http://dictybase.org/gene/DDB_G0287231	0.013631	0.261477	0.501
DDB_G0287167	http://dictybase.org/gene/DDB_G0287167	0.013328	0.281437	0.501
dhkA	http://dictybase.org/gene/DDB_G0280961	0.013314	0.321357	0.501
clcD	http://dictybase.org/gene/DDB_G0278639	0.013166	0.301397	0.501
DDB_G0286827_ps	http://dictybase.org/gene/DDB_G0286827	0.013089	0.181637	0.48516
fuk	http://dictybase.org/gene/DDB_G0269678	0.013086	0.271457	0.501
DDB_G0272370	http://dictybase.org/gene/DDB_G0272370	0.013077	0.351297	0.501
DDB_G0270350_ps	http://dictybase.org/gene/DDB_G0270350	0.013028	0.361277	0.501
DDB_G0276551	http://dictybase.org/gene/DDB_G0276551	0.01284	0.231537	0.501
DG1122	http://dictybase.org/gene/DDB_G0277397	0.012743	0.331337	0.501
DDB_G0273727	http://dictybase.org/gene/DDB_G0273727	0.012727	0.121756	0.44577
DDB_G0286309	http://dictybase.org/gene/DDB_G0286309	0.012031	0.281437	0.501
DDB_G0276285	http://dictybase.org/gene/DDB_G0276285	0.011977	0.271457	0.501
DDB_G0279653	http://dictybase.org/gene/DDB_G0279653	0.011973	0.341317	0.501
DDB_G0281447	http://dictybase.org/gene/DDB_G0281447	0.011765	0.221557	0.501
DDB_G0273985	http://dictybase.org/gene/DDB_G0273985	0.01153	0.241517	0.501
pks26	http://dictybase.org/gene/DDB_G0288457	0.011337	0.211577	0.501
atg12	http://dictybase.org/gene/DDB_G0282929	0.011266	0.391218	0.501
DDB_G0289627	http://dictybase.org/gene/DDB_G0289627	0.011219	0.291417	0.501
rbrA	http://dictybase.org/gene/DDB_G0286961	0.011103	0.321357	0.501
DDB_G0276251	http://dictybase.org/gene/DDB_G0276251	0.011059	0.281437	0.501
DDB_G0284741	http://dictybase.org/gene/DDB_G0284741	0.010778	0.221557	0.501
gacR	http://dictybase.org/gene/DDB_G0278755	0.01069	0.331337	0.501
DDB_G0284227	http://dictybase.org/gene/DDB_G0284227	0.010579	0.301397	0.501
DG1105	http://dictybase.org/gene/DDB_G0277843	0.010513	0.291417	0.501
DDB_G0281589	http://dictybase.org/gene/DDB_G0281589	0.010347	0.421158	0.501
regA	http://dictybase.org/gene/DDB_G0284331	0.010083	0.341317	0.501
DDB_G0281767	http://dictybase.org/gene/DDB_G0281767	0.009873	0.241517	0.501
DDB_G0348834	http://dictybase.org/gene/DDB_G0348834	0.009435	0.301397	0.501
DDB_G0267526	http://dictybase.org/gene/DDB_G0267526	0.009408	0.261477	0.501
mkcB	http://dictybase.org/gene/DDB_G0290723	0.009162	0.251497	0.501
aslA-2	http://dictybase.org/gene/DDB_G0273713	0.008842	0.171657	0.4795
gxcA	http://dictybase.org/gene/DDB_G0277987	0.008835	0.281437	0.501
DDB_G0270652	http://dictybase.org/gene/DDB_G0270652	0.008833	0.191617	0.4923
acbd6	http://dictybase.org/gene/DDB_G0290237	0.008534	0.311377	0.501
DDB_G0269430	http://dictybase.org/gene/DDB_G0269430	0.008271	0.251497	0.501
DDB_G0349321	http://dictybase.org/gene/DDB_G0349321	0.00821	0.261477	0.501
DDB_G0267494	http://dictybase.org/gene/DDB_G0267494	0.007907	0.361277	0.501
fnkE	http://dictybase.org/gene/DDB_G0275879	0.007904	0.351297	0.501
act34_ps	http://dictybase.org/gene/DDB_G0272446	0.007731	0.351297	0.501
DDB_G0293300	http://dictybase.org/gene/DDB_G0293300	0.007725	0.281437	0.501
tgrO3	http://dictybase.org/gene/DDB_G0268304	0.007526	0.211577	0.501
DDB_G0282555	http://dictybase.org/gene/DDB_G0282555	0.007511	0.261477	0.501
DDB_G0275937	http://dictybase.org/gene/DDB_G0275937	0.007277	0.251497	0.501
DDB_G0290947	http://dictybase.org/gene/DDB_G0290947	0.007246	0.321357	0.501
arpE	http://dictybase.org/gene/DDB_G0291728	0.006974	0.431138	0.501
DDB_G0293934	http://dictybase.org/gene/DDB_G0293934	0.006955	0.391218	0.501
DDB_G0272807	http://dictybase.org/gene/DDB_G0272807	0.006928	0.321357	0.501
DDB_G0291798	http://dictybase.org/gene/DDB_G0291798	0.006439	0.301397	0.501
DDB_G0275855	http://dictybase.org/gene/DDB_G0275855	0.006326	0.351297	0.501
DDB_G0268314	http://dictybase.org/gene/DDB_G0268314	0.006138	0.351297	0.501
DDB_G0268968	http://dictybase.org/gene/DDB_G0268968	0.006064	0.321357	0.501
DDB_G0281785	http://dictybase.org/gene/DDB_G0281785	0.005762	0.391218	0.501
DDB_G0284825	http://dictybase.org/gene/DDB_G0284825	0.005718	0.421158	0.501
DDB_G0267496	http://dictybase.org/gene/DDB_G0267496	0.005506	0.241517	0.501
ctrA	http://dictybase.org/gene/DDB_G0291227	0.005458	0.271457	0.501
DDB_G0349499	http://dictybase.org/gene/DDB_G0349499	0.005456	0.311377	0.501
DDB_G0278087_ps	http://dictybase.org/gene/DDB_G0278087	0.005173	0.321357	0.501
DDB_G0292920	http://dictybase.org/gene/DDB_G0292920	0.004982	0.371257	0.501
DDB_G0274043	http://dictybase.org/gene/DDB_G0274043	0.004751	0.241517	0.501
DDB_G0267768	http://dictybase.org/gene/DDB_G0267768	0.004686	0.171657	0.4795
comB	http://dictybase.org/gene/DDB_G0281825	0.004531	0.361277	0.501
DDB_G0267958	http://dictybase.org/gene/DDB_G0267958	0.004526	0.431138	0.501
DDB_G0272474	http://dictybase.org/gene/DDB_G0272474	0.004495	0.311377	0.501
migA	http://dictybase.org/gene/DDB_G0283263	0.00432	0.361277	0.501
DDB_G0274487	http://dictybase.org/gene/DDB_G0274487	0.004263	0.411178	0.501
DDB_G0281541	http://dictybase.org/gene/DDB_G0281541	0.004018	0.381238	0.501
DDB_G0284481	http://dictybase.org/gene/DDB_G0284481	0.003989	0.321357	0.501
DDB_G0289517	http://dictybase.org/gene/DDB_G0289517	0.003973	0.391218	0.501
DDB_G0273815	http://dictybase.org/gene/DDB_G0273815	0.00396	0.141717	0.45985
iplA	http://dictybase.org/gene/DDB_G0292564	0.0039	0.391218	0.501
DDB_G0273809	http://dictybase.org/gene/DDB_G0273809	0.003189	0.241517	0.501
DDB_G0284059	http://dictybase.org/gene/DDB_G0284059	0.003093	0.381238	0.501
DDB_G0273949	http://dictybase.org/gene/DDB_G0273949	0.002936	0.301397	0.501
cofD-2	http://dictybase.org/gene/DDB_G0274057	0.002763	0.331337	0.501
DDB_G0273101	http://dictybase.org/gene/DDB_G0273101	0.002755	0.401198	0.501
suox	http://dictybase.org/gene/DDB_G0278893	0.002586	0.321357	0.501
DDB_G0290697	http://dictybase.org/gene/DDB_G0290697	0.00255	0.321357	0.501
DDB_G0271468	http://dictybase.org/gene/DDB_G0271468	0.002414	0.341317	0.501
DDB_G0293302	http://dictybase.org/gene/DDB_G0293302	0.002394	0.221557	0.501
tgrJ1	http://dictybase.org/gene/DDB_G0271556	0.002311	0.381238	0.501
pncA	http://dictybase.org/gene/DDB_G0293618	0.002271	0.371257	0.501
DG1124	http://dictybase.org/gene/DDB_G0274577	0.002187	0.351297	0.501
DDB_G0283759	http://dictybase.org/gene/DDB_G0283759	0.002091	0.341317	0.501
DDB_G0289355	http://dictybase.org/gene/DDB_G0289355	0.001969	0.261477	0.501
vps13l	http://dictybase.org/gene/DDB_G0277219	0.00195	0.401198	0.501
vps13D	http://dictybase.org/gene/DDB_G0286545	0.001743	0.381238	0.501
snpC	http://dictybase.org/gene/DDB_G0269186	0.001512	0.491018	0.501
dscA-2	http://dictybase.org/gene/DDB_G0273919	0.000968	0.361277	0.501
irlB-1	http://dictybase.org/gene/DDB_G0273333	0.000899	0.331337	0.501
DDB_G0293612	http://dictybase.org/gene/DDB_G0293612	0.000735	0.431138	0.501
dhkJ	http://dictybase.org/gene/DDB_G0277883	0.000727	0.331337	0.501
comF-2	http://dictybase.org/gene/DDB_G0273669	0.000644	0.311377	0.501
DDB_G0294555	http://dictybase.org/gene/DDB_G0294555	8.8e-05	0.411178	0.501
DDB_G0273831	http://dictybase.org/gene/DDB_G0273831	-8.1e-05	0.341317	0.501
DDB_G0269452	http://dictybase.org/gene/DDB_G0269452	-0.000293	0.251497	0.501
pkaR	http://dictybase.org/gene/DDB_G0279413	-0.00041	0.401198	0.501
DDB_G0271248	http://dictybase.org/gene/DDB_G0271248	-0.00064	0.391218	0.501
dhkL	http://dictybase.org/gene/DDB_G0282927	-0.000675	0.381238	0.501
DDB_G0289903	http://dictybase.org/gene/DDB_G0289903	-0.000797	0.351297	0.501
DDB_G0282495	http://dictybase.org/gene/DDB_G0282495	-0.000822	0.401198	0.501
fia	http://dictybase.org/gene/DDB_G0284389	-0.000906	0.351297	0.501
comF-1	http://dictybase.org/gene/DDB_G0273257	-0.001551	0.331337	0.501
dagA	http://dictybase.org/gene/DDB_G0285161	-0.001644	0.371257	0.501
DDB_G0283585	http://dictybase.org/gene/DDB_G0283585	-0.001647	0.361277	0.501
DDB_G0278771	http://dictybase.org/gene/DDB_G0278771	-0.001668	0.381238	0.501
pgtD	http://dictybase.org/gene/DDB_G0278731	-0.001727	0.381238	0.501
DDB_G0290419	http://dictybase.org/gene/DDB_G0290419	-0.001834	0.331337	0.501
DDB_G0267800	http://dictybase.org/gene/DDB_G0267800	-0.002449	0.421158	0.501
DDB_G0273595	http://dictybase.org/gene/DDB_G0273595	-0.002549	0.361277	0.501
DDB_G0277169	http://dictybase.org/gene/DDB_G0277169	-0.002632	0.201597	0.49834
abcG12	http://dictybase.org/gene/DDB_G0274115	-0.002692	0.271457	0.501
DDB_G0275813	http://dictybase.org/gene/DDB_G0275813	-0.002739	0.411178	0.501
DDB_G0271962	http://dictybase.org/gene/DDB_G0271962	-0.002836	0.451098	0.501
docA	http://dictybase.org/gene/DDB_G0291974	-0.002868	0.401198	0.501
abcH3	http://dictybase.org/gene/DDB_G0275697	-0.002912	0.421158	0.501
DDB_G0284269	http://dictybase.org/gene/DDB_G0284269	-0.002975	0.291417	0.501
rad51-2	http://dictybase.org/gene/DDB_G0273611	-0.00302	0.361277	0.501
DDB_G0280581	http://dictybase.org/gene/DDB_G0280581	-0.003037	0.331337	0.501
rckA	http://dictybase.org/gene/DDB_G0278737	-0.003108	0.381238	0.501
mybP	http://dictybase.org/gene/DDB_G0270560	-0.00314	0.421158	0.501
DDB_G0284523	http://dictybase.org/gene/DDB_G0284523	-0.003181	0.351297	0.501
DDB_G0272340	http://dictybase.org/gene/DDB_G0272340	-0.003237	0.301397	0.501
msh3	http://dictybase.org/gene/DDB_G0281683	-0.00355	0.451098	0.501
ugt52	http://dictybase.org/gene/DDB_G0288655	-0.003818	0.441118	0.501
DDB_G0277171	http://dictybase.org/gene/DDB_G0277171	-0.003914	0.401198	0.501
fbxA	http://dictybase.org/gene/DDB_G0276887	-0.004027	0.441118	0.501
iliQ	http://dictybase.org/gene/DDB_G0292926	-0.00431	0.411178	0.501
DDB_G0283373	http://dictybase.org/gene/DDB_G0283373	-0.004441	0.421158	0.501
DDB_G0286279	http://dictybase.org/gene/DDB_G0286279	-0.004453	0.441118	0.501
DDB_G0277419	http://dictybase.org/gene/DDB_G0277419	-0.004575	0.451098	0.501
DDB_G0286373	http://dictybase.org/gene/DDB_G0286373	-0.004607	0.371257	0.501
DDB_G0271212	http://dictybase.org/gene/DDB_G0271212	-0.004731	0.311377	0.501
glpV	http://dictybase.org/gene/DDB_G0281383	-0.004818	0.381238	0.501
DDB_G0281059	http://dictybase.org/gene/DDB_G0281059	-0.004946	0.231537	0.501
DDB_G0289363	http://dictybase.org/gene/DDB_G0289363	-0.00503	0.331337	0.501
DDB_G0278359	http://dictybase.org/gene/DDB_G0278359	-0.005044	0.391218	0.501
DDB_G0281537	http://dictybase.org/gene/DDB_G0281537	-0.005348	0.441118	0.501
DDB_G0271532	http://dictybase.org/gene/DDB_G0271532	-0.005422	0.441118	0.501
DDB_G0270772	http://dictybase.org/gene/DDB_G0270772	-0.005705	0.401198	0.501
wimA	http://dictybase.org/gene/DDB_G0269198	-0.005763	0.331337	0.501
DDB_G0270190	http://dictybase.org/gene/DDB_G0270190	-0.00665	0.401198	0.501
DDB_G0285153	http://dictybase.org/gene/DDB_G0285153	-0.006652	0.331337	0.501
DDB_G0276509	http://dictybase.org/gene/DDB_G0276509	-0.0067	0.411178	0.501
myoJ	http://dictybase.org/gene/DDB_G0272112	-0.006808	0.461078	0.501
splA	http://dictybase.org/gene/DDB_G0283385	-0.006891	0.451098	0.501
DDB_G0288595	http://dictybase.org/gene/DDB_G0288595	-0.006914	0.401198	0.501
DDB_G0277777	http://dictybase.org/gene/DDB_G0277777	-0.007361	0.401198	0.501
DDB_G0288121	http://dictybase.org/gene/DDB_G0288121	-0.007492	0.461078	0.501
DDB_G0282139	http://dictybase.org/gene/DDB_G0282139	-0.007495	0.461078	0.501
DDB_G0290835	http://dictybase.org/gene/DDB_G0290835	-0.007591	0.471058	0.501
DDB_G0291418	http://dictybase.org/gene/DDB_G0291418	-0.007689	0.411178	0.501
DDB_G0280333	http://dictybase.org/gene/DDB_G0280333	-0.007833	0.431138	0.501
msh5	http://dictybase.org/gene/DDB_G0284747	-0.008022	0.451098	0.501
DDB_G0286129	http://dictybase.org/gene/DDB_G0286129	-0.008037	0.471058	0.501
vps13E	http://dictybase.org/gene/DDB_G0268886	-0.00808	0.381238	0.501
DDB_G0279671	http://dictybase.org/gene/DDB_G0279671	-0.008192	0.421158	0.501
DDB_G0279971	http://dictybase.org/gene/DDB_G0279971	-0.008255	0.451098	0.501
DDB_G0272540	http://dictybase.org/gene/DDB_G0272540	-0.008309	0.481038	0.501
DDB_G0282945	http://dictybase.org/gene/DDB_G0282945	-0.008319	0.301397	0.501
DDB_G0282521	http://dictybase.org/gene/DDB_G0282521	-0.008362	0.441118	0.501
DDB_G0292462	http://dictybase.org/gene/DDB_G0292462	-0.008512	0.291417	0.501
DDB_G0291812	http://dictybase.org/gene/DDB_G0291812	-0.008558	0.401198	0.501
tgrN1	http://dictybase.org/gene/DDB_G0272736	-0.008613	0.401198	0.501
DDB_G0290685	http://dictybase.org/gene/DDB_G0290685	-0.00903	0.331337	0.501
DDB_G0284387	http://dictybase.org/gene/DDB_G0284387	-0.009078	0.471058	0.501
DDB_G0292054	http://dictybase.org/gene/DDB_G0292054	-0.00912	0.441118	0.501
DDB_G0277707	http://dictybase.org/gene/DDB_G0277707	-0.009176	0.441118	0.501
DDB_G0270330	http://dictybase.org/gene/DDB_G0270330	-0.009214	0.331337	0.501
gacT	http://dictybase.org/gene/DDB_G0285163	-0.009436	0.491018	0.501
DDB_G0283215	http://dictybase.org/gene/DDB_G0283215	-0.009451	0.371257	0.501
DDB_G0273419	http://dictybase.org/gene/DDB_G0273419	-0.009525	0.441118	0.501
rcdII	http://dictybase.org/gene/DDB_G0284041	-0.009546	0.461078	0.501
DDB_G0275871	http://dictybase.org/gene/DDB_G0275871	-0.009617	0.441118	0.501
DG1037	http://dictybase.org/gene/DDB_G0287925	-0.009732	0.461078	0.501
DDB_G0272096	http://dictybase.org/gene/DDB_G0272096	-0.010037	0.391218	0.501
tipB	http://dictybase.org/gene/DDB_G0276333	-0.01007	0.451098	0.501
rhgB	http://dictybase.org/gene/DDB_G0280059	-0.010114	0.481038	0.501
DDB_G0292148	http://dictybase.org/gene/DDB_G0292148	-0.010321	0.461078	0.501
DDB_G0269546	http://dictybase.org/gene/DDB_G0269546	-0.010545	0.481038	0.501
mkpA	http://dictybase.org/gene/DDB_G0288249	-0.010587	0.391218	0.501
DDB_G0269128	http://dictybase.org/gene/DDB_G0269128	-0.010817	0.401198	0.501
DDB_G0274879	http://dictybase.org/gene/DDB_G0274879	-0.010898	0.431138	0.501
DDB_G0277253	http://dictybase.org/gene/DDB_G0277253	-0.011025	0.451098	0.501
DDB_G0291682_ps	http://dictybase.org/gene/DDB_G0291682	-0.011071	0.491018	0.501
DDB_G0293948	http://dictybase.org/gene/DDB_G0293948	-0.011333	0.421158	0.501
DDB_G0276559	http://dictybase.org/gene/DDB_G0276559	-0.011475	0.431138	0.501
DDB_G0284255	http://dictybase.org/gene/DDB_G0284255	-0.011477	0.471058	0.501
DDB_G0272921	http://dictybase.org/gene/DDB_G0272921	-0.011676	0.431138	0.501
DDB_G0290321	http://dictybase.org/gene/DDB_G0290321	-0.011979	0.471058	0.501
DDB_G0273539	http://dictybase.org/gene/DDB_G0273539	-0.012119	0.351297	0.501
orfR1062	http://dictybase.org/gene/DDB_G0272114	-0.012264	0.491018	0.501
DDB_G0285747	http://dictybase.org/gene/DDB_G0285747	-0.01235	0.401198	0.501
abcG16	http://dictybase.org/gene/DDB_G0289331	-0.01243	0.461078	0.501
DDB_G0284195	http://dictybase.org/gene/DDB_G0284195	-0.012487	0.371257	0.501
DDB_G0276303	http://dictybase.org/gene/DDB_G0276303	-0.012739	0.421158	0.501
DDB_G0269390	http://dictybase.org/gene/DDB_G0269390	-0.012862	0.331337	0.501
DDB_G0269376	http://dictybase.org/gene/DDB_G0269376	-0.012922	0.391218	0.501
DDB_G0287873	http://dictybase.org/gene/DDB_G0287873	-0.013226	0.461078	0.501
DDB_G0287275	http://dictybase.org/gene/DDB_G0287275	-0.013274	0.401198	0.501
aslD-2	http://dictybase.org/gene/DDB_G0273717	-0.013313	0.451098	0.501
potA	http://dictybase.org/gene/DDB_G0282291	-0.01332	0.411178	0.501
DDB_G0273149	http://dictybase.org/gene/DDB_G0273149	-0.013353	0.451098	0.501
DDB_G0273859	http://dictybase.org/gene/DDB_G0273859	-0.013359	0.421158	0.501
DDB_G0274949	http://dictybase.org/gene/DDB_G0274949	-0.013399	0.371257	0.501
pks3	http://dictybase.org/gene/DDB_G0271000	-0.013405	0.471058	0.501
manG	http://dictybase.org/gene/DDB_G0287577	-0.013466	0.371257	0.501
DDB_G0292260_RTE	http://dictybase.org/gene/DDB_G0292260	-0.013702	0.261477	0.501
DDB_G0288031	http://dictybase.org/gene/DDB_G0288031	-0.01382	0.481038	0.501
DDB_G0290061	http://dictybase.org/gene/DDB_G0290061	-0.013874	0.431138	0.501
DDB_G0273133	http://dictybase.org/gene/DDB_G0273133	-0.014105	0.431138	0.501
DDB_G0276545	http://dictybase.org/gene/DDB_G0276545	-0.014163	0.421158	0.501
cepK	http://dictybase.org/gene/DDB_G0293544	-0.014398	0.461078	0.501
DDB_G0281217	http://dictybase.org/gene/DDB_G0281217	-0.014436	0.421158	0.501
DDB_G0280503	http://dictybase.org/gene/DDB_G0280503	-0.01468	0.371257	0.501
DDB_G0288801	http://dictybase.org/gene/DDB_G0288801	-0.014871	0.451098	0.501
DDB_G0283015	http://dictybase.org/gene/DDB_G0283015	-0.015102	0.481038	0.501
sgmC	http://dictybase.org/gene/DDB_G0282265	-0.015122	0.471058	0.501
DDB_G0286995	http://dictybase.org/gene/DDB_G0286995	-0.015288	0.451098	0.501
DDB_G0289385	http://dictybase.org/gene/DDB_G0289385	-0.015294	0.481038	0.501
DDB_G0286999	http://dictybase.org/gene/DDB_G0286999	-0.015521	0.421158	0.501
glpD	http://dictybase.org/gene/DDB_G0291123	-0.015632	0.421158	0.501
DDB_G0274343	http://dictybase.org/gene/DDB_G0274343	-0.015662	0.431138	0.501
DDB_G0286417	http://dictybase.org/gene/DDB_G0286417	-0.01587	0.451098	0.501
frmC	http://dictybase.org/gene/DDB_G0289313	-0.016102	0.361277	0.501
DDB_G0291716	http://dictybase.org/gene/DDB_G0291716	-0.016228	0.441118	0.501
DDB_G0282679	http://dictybase.org/gene/DDB_G0282679	-0.016369	0.481038	0.501
DDB_G0285421	http://dictybase.org/gene/DDB_G0285421	-0.016539	0.451098	0.501
DDB_G0275081	http://dictybase.org/gene/DDB_G0275081	-0.016909	0.431138	0.501
DDB_G0275117	http://dictybase.org/gene/DDB_G0275117	-0.016931	0.451098	0.501
DDB_G0283725_ps	http://dictybase.org/gene/DDB_G0283725	-0.017073	0.421158	0.501
rsc12	http://dictybase.org/gene/DDB_G0277871	-0.017329	0.451098	0.501
DDB_G0281757	http://dictybase.org/gene/DDB_G0281757	-0.018112	0.421158	0.501
DDB_G0272134	http://dictybase.org/gene/DDB_G0272134	-0.018154	0.491018	0.501
DDB_G0273095	http://dictybase.org/gene/DDB_G0273095	-0.018321	0.431138	0.501
DDB_G0287837	http://dictybase.org/gene/DDB_G0287837	-0.018696	0.451098	0.501
DDB_G0270662	http://dictybase.org/gene/DDB_G0270662	-0.0188	0.321357	0.501
lvsA	http://dictybase.org/gene/DDB_G0269150	-0.019157	0.500998	0.501
DDB_G0277239	http://dictybase.org/gene/DDB_G0277239	-0.019215	0.471058	0.501
DDB_G0268914	http://dictybase.org/gene/DDB_G0268914	-0.019235	0.441118	0.501
DDB_G0283729	http://dictybase.org/gene/DDB_G0283729	-0.019503	0.471058	0.501
DDB_G0280619	http://dictybase.org/gene/DDB_G0280619	-0.019523	0.441118	0.501
hdaD	http://dictybase.org/gene/DDB_G0279267	-0.019662	0.481038	0.501
DDB_G0293200_ps	http://dictybase.org/gene/DDB_G0293200	-0.019681	0.451098	0.501
DDB_G0272973	http://dictybase.org/gene/DDB_G0272973	-0.019711	0.491018	0.501
DDB_G0277467	http://dictybase.org/gene/DDB_G0277467	-0.020235	0.451098	0.501
tipC	http://dictybase.org/gene/DDB_G0267422	-0.020293	0.451098	0.501
DDB_G0291103	http://dictybase.org/gene/DDB_G0291103	-0.02034	0.411178	0.501
mlh3	http://dictybase.org/gene/DDB_G0283883	-0.020817	0.461078	0.501
DDB_G0292190	http://dictybase.org/gene/DDB_G0292190	-0.020945	0.441118	0.501
fscD	http://dictybase.org/gene/DDB_G0272240	-0.021739	0.491018	0.501
flpA	http://dictybase.org/gene/DDB_G0286549	-0.022129	0.491018	0.501
armc8	http://dictybase.org/gene/DDB_G0270626	-0.022288	0.461078	0.501
gnl1	http://dictybase.org/gene/DDB_G0285371	-0.022303	0.481038	0.501
abcC3	http://dictybase.org/gene/DDB_G0287691	-0.022377	0.500998	0.501
DDB_G0291279	http://dictybase.org/gene/DDB_G0291279	-0.022405	0.491018	0.501
DDB_G0293406	http://dictybase.org/gene/DDB_G0293406	-0.022691	0.491018	0.501
DDB_G0273417	http://dictybase.org/gene/DDB_G0273417	-0.023096	0.431138	0.501
DDB_G0274739	http://dictybase.org/gene/DDB_G0274739	-0.023336	0.481038	0.501
DDB_G0286363	http://dictybase.org/gene/DDB_G0286363	-0.023338	0.451098	0.501
DDB_G0271482	http://dictybase.org/gene/DDB_G0271482	-0.023693	0.461078	0.501
DDB_G0279105	http://dictybase.org/gene/DDB_G0279105	-0.023731	0.481038	0.501
DDB_G0272058	http://dictybase.org/gene/DDB_G0272058	-0.024042	0.491018	0.501
DDB_G0279089	http://dictybase.org/gene/DDB_G0279089	-0.024051	0.491018	0.501
DDB_G0276813	http://dictybase.org/gene/DDB_G0276813	-0.024191	0.391218	0.501
DDB_G0288283	http://dictybase.org/gene/DDB_G0288283	-0.024361	0.481038	0.501
spyA	http://dictybase.org/gene/DDB_G0285263	-0.024418	0.500998	0.501
DDB_G0272016	http://dictybase.org/gene/DDB_G0272016	-0.024579	0.491018	0.501
galE	http://dictybase.org/gene/DDB_G0275295	-0.024617	0.431138	0.501
DDB_G0271354	http://dictybase.org/gene/DDB_G0271354	-0.024753	0.451098	0.501
DDB_G0282149	http://dictybase.org/gene/DDB_G0282149	-0.024779	0.491018	0.501
DDB_G0268694	http://dictybase.org/gene/DDB_G0268694	-0.025046	0.500998	0.501
DDB_G0278099_ps	http://dictybase.org/gene/DDB_G0278099	-0.025122	0.431138	0.501
fncI	http://dictybase.org/gene/DDB_G0293476	-0.025331	0.491018	0.501
DDB_G0286931	http://dictybase.org/gene/DDB_G0286931	-0.025435	0.471058	0.501
DDB_G0282795	http://dictybase.org/gene/DDB_G0282795	-0.025483	0.500998	0.501
DDB_G0293982	http://dictybase.org/gene/DDB_G0293982	-0.025499	0.461078	0.501
DDB_G0284177	http://dictybase.org/gene/DDB_G0284177	-0.02565	0.431138	0.501
DDB_G0277601	http://dictybase.org/gene/DDB_G0277601	-0.025667	0.471058	0.501
DDB_G0289529	http://dictybase.org/gene/DDB_G0289529	-0.025919	0.451098	0.501
DDB_G0287085	http://dictybase.org/gene/DDB_G0287085	-0.025934	0.491018	0.501
DDB_G0291466	http://dictybase.org/gene/DDB_G0291466	-0.026197	0.491018	0.501
DDB_G0273331	http://dictybase.org/gene/DDB_G0273331	-0.026268	0.351297	0.501
DDB_G0278621	http://dictybase.org/gene/DDB_G0278621	-0.026368	0.471058	0.501
DDB_G0282501	http://dictybase.org/gene/DDB_G0282501	-0.026522	0.461078	0.501
DDB_G0270224	http://dictybase.org/gene/DDB_G0270224	-0.026623	0.491018	0.501
DDB_G0270488	http://dictybase.org/gene/DDB_G0270488	-0.026679	0.461078	0.501
gtaG	http://dictybase.org/gene/DDB_G0270756	-0.026732	0.471058	0.501
DDB_G0277475	http://dictybase.org/gene/DDB_G0277475	-0.027565	0.471058	0.501
zizB	http://dictybase.org/gene/DDB_G0293084	-0.028192	0.500998	0.501
DDB_G0272316	http://dictybase.org/gene/DDB_G0272316	-0.028436	0.461078	0.501
DDB_G0273569_ps	http://dictybase.org/gene/DDB_G0273569	-0.02853	0.441118	0.501
fimD	http://dictybase.org/gene/DDB_G0270762	-0.028561	0.491018	0.501
uppA	http://dictybase.org/gene/DDB_G0289875	-0.02887	0.481038	0.501
DDB_G0286133	http://dictybase.org/gene/DDB_G0286133	-0.028898	0.491018	0.501
DDB_G0278633_RTE	http://dictybase.org/gene/DDB_G0278633	-0.029126	0.461078	0.501
DDB_G0277647_ps	http://dictybase.org/gene/DDB_G0277647	-0.029304	0.481038	0.501
pgtB	http://dictybase.org/gene/DDB_G0290079	-0.02992	0.451098	0.501
DDB_G0292196	http://dictybase.org/gene/DDB_G0292196	-0.029952	0.481038	0.501
DDB_G0270344	http://dictybase.org/gene/DDB_G0270344	-0.030184	0.491018	0.501
DDB_G0292932	http://dictybase.org/gene/DDB_G0292932	-0.030377	0.461078	0.501
DDB_G0293440	http://dictybase.org/gene/DDB_G0293440	-0.030475	0.471058	0.501
DDB_G0282305	http://dictybase.org/gene/DDB_G0282305	-0.030919	0.471058	0.501
DDB_G0278303_ps	http://dictybase.org/gene/DDB_G0278303	-0.03101	0.471058	0.501
iqgD	http://dictybase.org/gene/DDB_G0275731	-0.031049	0.481038	0.501
gxcN	http://dictybase.org/gene/DDB_G0277017	-0.031696	0.491018	0.501
DG1113	http://dictybase.org/gene/DDB_G0280959	-0.03184	0.481038	0.501
DDB_G0282327	http://dictybase.org/gene/DDB_G0282327	-0.031974	0.441118	0.501
DDB_G0282783	http://dictybase.org/gene/DDB_G0282783	-0.032193	0.500998	0.501
DDB_G0287061	http://dictybase.org/gene/DDB_G0287061	-0.032723	0.491018	0.501
DDB_G0287375	http://dictybase.org/gene/DDB_G0287375	-0.032757	0.500998	0.501
DDB_G0280221	http://dictybase.org/gene/DDB_G0280221	-0.032849	0.500998	0.501
abcG18	http://dictybase.org/gene/DDB_G0275687	-0.033196	0.441118	0.501
DDB_G0285409	http://dictybase.org/gene/DDB_G0285409	-0.033285	0.500998	0.501
DDB_G0285865	http://dictybase.org/gene/DDB_G0285865	-0.033328	0.500998	0.501
DDB_G0278291	http://dictybase.org/gene/DDB_G0278291	-0.033364	0.500998	0.501
DDB_G0282059	http://dictybase.org/gene/DDB_G0282059	-0.033504	0.461078	0.501
DDB_G0283199	http://dictybase.org/gene/DDB_G0283199	-0.033505	0.500998	0.501
aslD-1	http://dictybase.org/gene/DDB_G0273211	-0.034271	0.471058	0.501
DDB_G0282943	http://dictybase.org/gene/DDB_G0282943	-0.034334	0.491018	0.501
DDB_G0287699	http://dictybase.org/gene/DDB_G0287699	-0.034907	0.500998	0.501
kcnma1	http://dictybase.org/gene/DDB_G0269896	-0.035322	0.481038	0.501
dhkM	http://dictybase.org/gene/DDB_G0282377	-0.035716	0.491018	0.501
DDB_G0268524_RTE	http://dictybase.org/gene/DDB_G0268524	-0.035717	0.481038	0.501
DDB_G0293390	http://dictybase.org/gene/DDB_G0293390	-0.035927	0.491018	0.501
dhkB	http://dictybase.org/gene/DDB_G0277845	-0.036048	0.491018	0.501
DDB_G0283025_ps	http://dictybase.org/gene/DDB_G0283025	-0.036125	0.500998	0.501
acrA	http://dictybase.org/gene/DDB_G0267376	-0.036197	0.491018	0.501
comH	http://dictybase.org/gene/DDB_G0280547	-0.036417	0.471058	0.501
DDB_G0279727	http://dictybase.org/gene/DDB_G0279727	-0.03666	0.411178	0.501
DDB_G0271414	http://dictybase.org/gene/DDB_G0271414	-0.037113	0.471058	0.501
DDB_G0274975	http://dictybase.org/gene/DDB_G0274975	-0.037152	0.491018	0.501
DDB_G0286431	http://dictybase.org/gene/DDB_G0286431	-0.037355	0.500998	0.501
ptpC	http://dictybase.org/gene/DDB_G0282145	-0.037578	0.481038	0.501
D7	http://dictybase.org/gene/DDB_G0284613	-0.037839	0.500998	0.501
DDB_G0293578	http://dictybase.org/gene/DDB_G0293578	-0.038801	0.491018	0.501
DDB_G0267532	http://dictybase.org/gene/DDB_G0267532	-0.038981	0.491018	0.501
DDB_G0270570	http://dictybase.org/gene/DDB_G0270570	-0.03924	0.491018	0.501
cofF	http://dictybase.org/gene/DDB_G0274589	-0.039413	0.431138	0.501
DDB_G0277667	http://dictybase.org/gene/DDB_G0277667	-0.039469	0.500998	0.501
med23	http://dictybase.org/gene/DDB_G0270434	-0.039728	0.500998	0.501
DDB_G0273005	http://dictybase.org/gene/DDB_G0273005	-0.040657	0.500998	0.501
DDB_G0282491	http://dictybase.org/gene/DDB_G0282491	-0.040928	0.500998	0.501
DDB_G0270342	http://dictybase.org/gene/DDB_G0270342	-0.041125	0.500998	0.501
forF	http://dictybase.org/gene/DDB_G0289763	-0.04127	0.500998	0.501
DDB_G0271900	http://dictybase.org/gene/DDB_G0271900	-0.043345	0.500998	0.501
aslA-1	http://dictybase.org/gene/DDB_G0273213	-0.045139	0.471058	0.501
DDB_G0284427	http://dictybase.org/gene/DDB_G0284427	-0.045224	0.500998	0.501
DDB_G0292032	http://dictybase.org/gene/DDB_G0292032	-0.045478	0.500998	0.501
DDB_G0273091	http://dictybase.org/gene/DDB_G0273091	-0.045507	0.500998	0.501
DDB_G0288411_ps	http://dictybase.org/gene/DDB_G0288411	-0.045878	0.481038	0.501
DDB_G0289049_RTE	http://dictybase.org/gene/DDB_G0289049	-0.0477	0.491018	0.501
DDB_G0278213	http://dictybase.org/gene/DDB_G0278213	-0.048079	0.500998	0.501
DDB_G0278657_ps	http://dictybase.org/gene/DDB_G0278657	-0.048737	0.500998	0.501
DDB_G0275631	http://dictybase.org/gene/DDB_G0275631	-0.049139	0.500998	0.501
abcD2	http://dictybase.org/gene/DDB_G0293194	-0.052021	0.500998	0.501
DDB_G0274867	http://dictybase.org/gene/DDB_G0274867	-0.053769	0.471058	0.501
DDB_G0270426	http://dictybase.org/gene/DDB_G0270426	-0.054217	0.500998	0.501
DDB_G0270016	http://dictybase.org/gene/DDB_G0270016	-0.055062	0.500998	0.501
DDB_G0289861	http://dictybase.org/gene/DDB_G0289861	-0.056949	0.491018	0.501
cudA	http://dictybase.org/gene/DDB_G0284465	-0.057423	0.500998	0.501
abcC7	http://dictybase.org/gene/DDB_G0291243	-0.064367	0.481038	0.501
DDB_G0272188	http://dictybase.org/gene/DDB_G0272188	-0.068475	0.500998	0.501
abcB3	http://dictybase.org/gene/DDB_G0291714	-0.069881	0.500998	0.501
DDB_G0272909	http://dictybase.org/gene/DDB_G0272909	-0.070495	0.500998	0.501
