# Supplementary material
Source: publisher figshare collection journal article supplement (https://plos.figshare.com/articles/dataset/_/1575190)
Supplement: Supplementary file 1 [file 1 › S3_Table.pdf]

**Supplementary Table 3. The impact of modeling circumstantial data on the overall *D. discoideum* bacterial response gene prioritization.** The table lists the top-30 candidate genes obtained by prioritization by data fusion of 14, 7, 4, 3 and 2 data sets from the data fusion graphs in **Supplementary Fig. 3**. Genes in bold are the ones selected for the experimental study.

| 14 data sets  | 7 data sets   | 4 data sets  | 3 data sets  | 2 data sets  |
|---------------|---------------|--------------|--------------|--------------|
| <b>cf50-1</b> | shkA          | rbsk         | DDB_G0271348 | arpE         |
| <b>smlA</b>   | DDB_G0288519  | DDB_G0272614 | DDB_G0268872 | DDB_G0278663 |
| <b>acbA</b>   | <b>pten</b>   | DDB_G0278163 | DDB_G0287153 | DDB_G0281091 |
| pirA          | <b>cf50-1</b> | qtrt1        | yelA         | DDB_G0267742 |
| rps10         | <b>acbA</b>   | DDB_G0279263 | sibD         | <b>pten</b>  |
| <b>abpC</b>   | <b>smlA</b>   | DDB_G0286079 | DDB_G0272380 | DDB_G0277937 |
| tirA          | DDB_G0288947  | adprh        | DDB_G0288519 | DDB_G0271120 |
| DDB_G0272184  | DDB_G0275057  | DDB_G0279939 | dnaja1       | yipf1        |
| <b>pikB</b>   | tra2          | DDB_G0272382 | rabT2        | DDB_G0267494 |
| vps46         | sibC          | gdt6         | DDB_G0292920 | DDB_G0272016 |
| <b>pikA</b>   | rbsk          | ku80         | sibB         | eif2b1       |
| swp1          | DDB_G0281967  | arpF         | DDB_G0278163 | empB         |
| ggtA          | <b>pikA</b>   | cofD-1       | adprh        | DDB_G0291926 |
| DDB_G0288519  | DDB_G0272614  | DDB_G0288551 | lvsG         | vps13l       |
| <b>pten</b>   | DG1112        | empB         | DDB_G0285403 | cenB         |
| DDB_G0288551  | adprh         | gacV         | tpsB         | ku80         |
| tra2          | DDB_G0288551  | DDB_G0294629 | ndm          | DDB_G0288161 |
| DDB_G0286429  | DD_G0283989   | swp1         | DDB_G0281559 | DDB_G0268232 |
| dscA-1        | dscA-1        | gbqA         | DDB_G0275671 | rbsk         |
| cinC          | gdt6          | DDB_G0291926 | DDB_G0288963 | atg12        |
| udpB          | piaA          | DDB_G0273031 | gbqA         | vps46        |
| sfbA          | DDB_G0279145  | DDB_G0287643 | uduA1        | DDB_G0290575 |
| <b>modA</b>   | DDB_G0290575  | DDB_G0268876 | acrA         | DDB_G0267958 |
| DDB_G0287399  | abcA1         | abkD         | arpE         | DDB_G0287153 |
| prmt5         | DDB_G0272380  | DDB_G0268206 | uduC         | gacV         |
| dpoA          | DDB_G0272801  | DDB_G0279145 | DG1098       | DDB_G0276509 |
| DDB_G0278663  | lipA          | DDB_G0272380 | DDB_G0273451 | DDB_G0279971 |
| psiP          | cepG          | plbG         | adprt3       | usp39        |
| sibC          | lvsG          | cct3         | DDB_G0288031 | DDB_G0280477 |
| DDB_G0291926  | uduA1         | psiP         | yipf1        | DDB_G0292098 |
