# Supplementary material
Source: publisher figshare collection journal article supplement (https://plos.figshare.com/articles/dataset/_/1575190)
Supplement: Supplementary file 1 [file 1 › S4_Fig.pdf]

Gene-gene  
similarity constraints

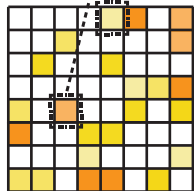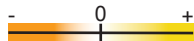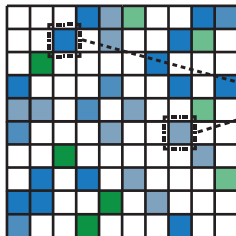

Phenotype-phenotype  
similarity constraints

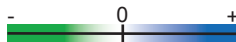

Phenotypes

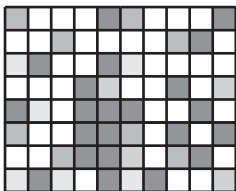

Genes

$\approx$

Gene latent  
matrix

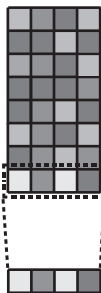

Memberships of a gene  
in gene latent components

Latent component  
interaction matrix

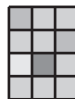

$\times$

$\times$

Phenotype latent  
matrix

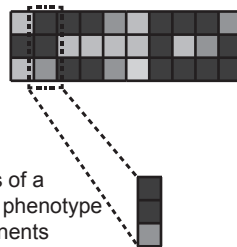

Memberships of a  
phenotype in phenotype  
latent components
