# Supplementary material
Source: publisher figshare collection journal article supplement (https://plos.figshare.com/articles/dataset/_/1575190)

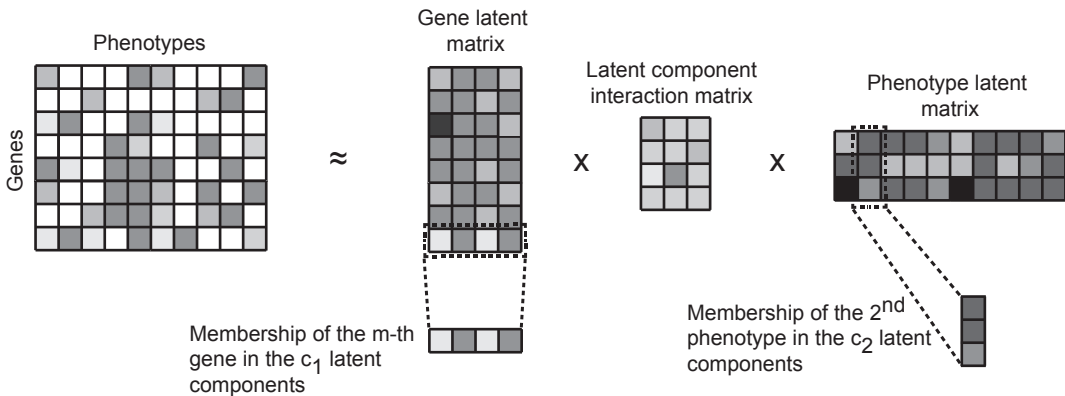
 $\mathbf{R}^{m \times n}$ 
 $\approx$ 
 $\mathbf{F}^{m \times c_1}$ 
 $\times$ 
 $\mathbf{S}^{c_1 \times c_2}$ 
 $\times$ 
 $\mathbf{G}^{c_2 \times n}$

Supplement: Supplementary file 1 [file 1 › S1_Fig.pdf]

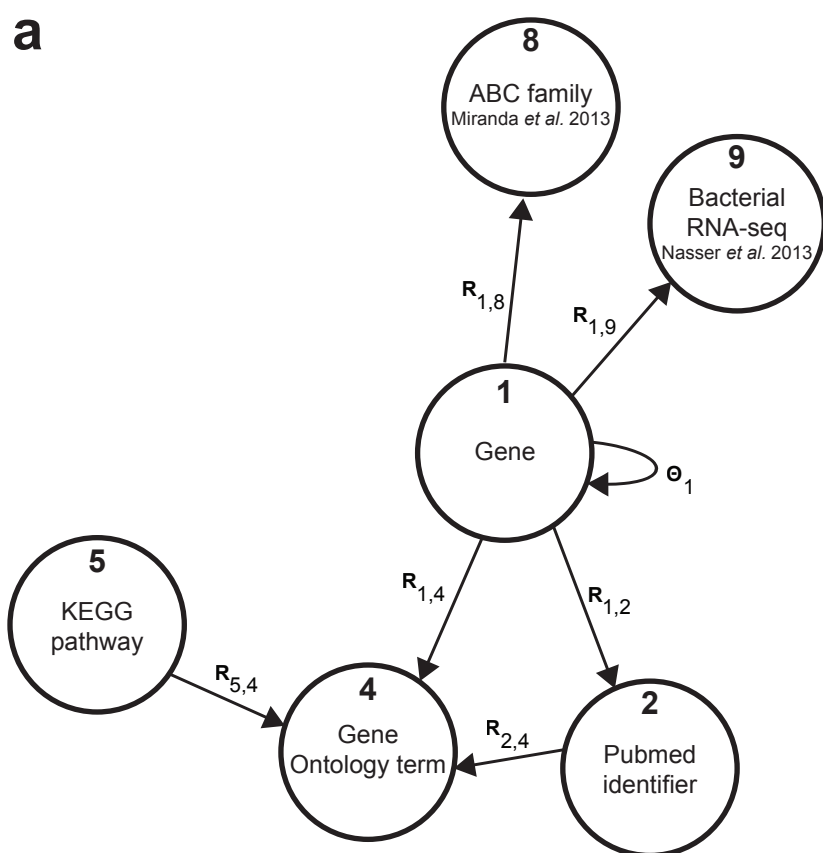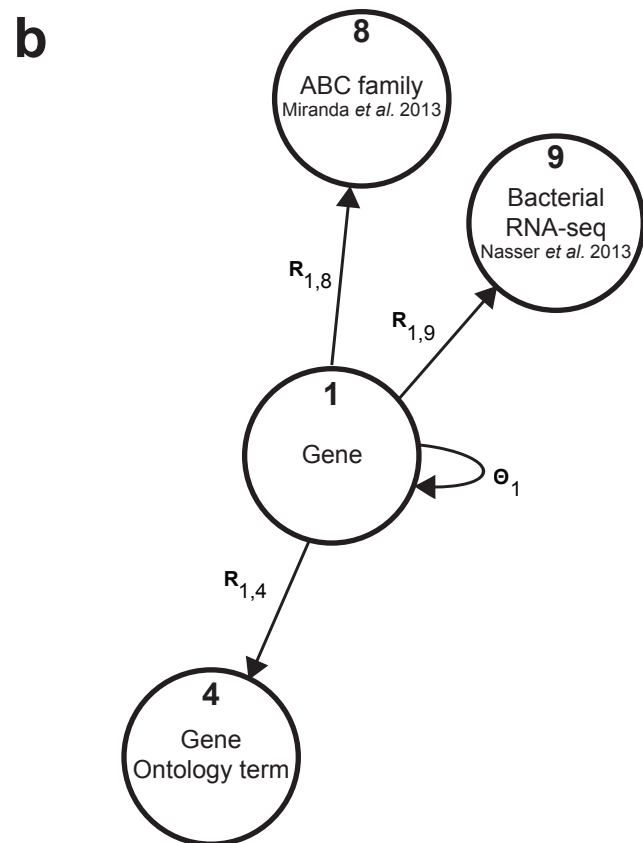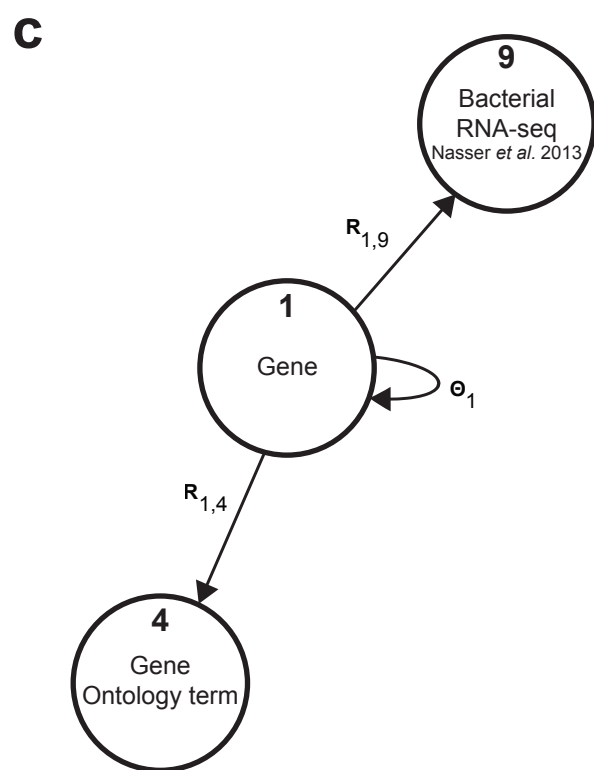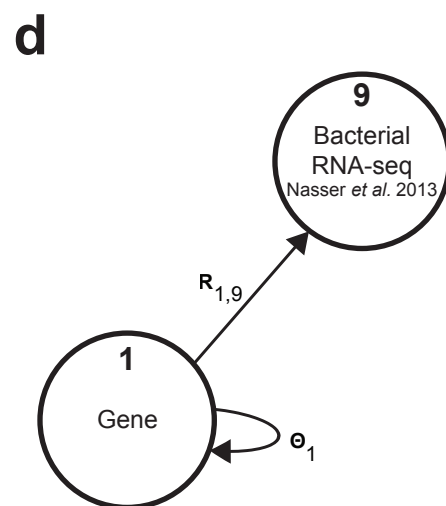

Supplement: Supplementary file 1 [file 1 › S3_Fig.pdf]

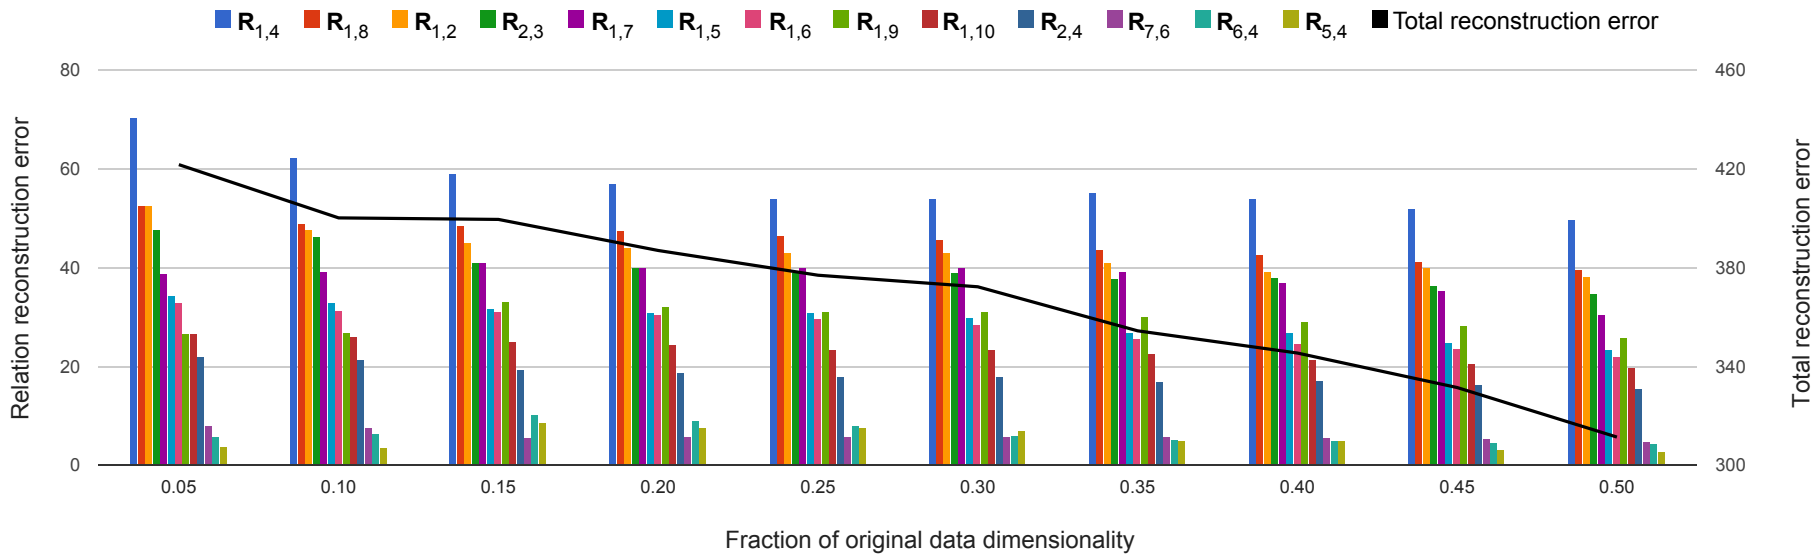

Supplement: Supplementary file 1 [file 1 › S5_Fig.pdf]

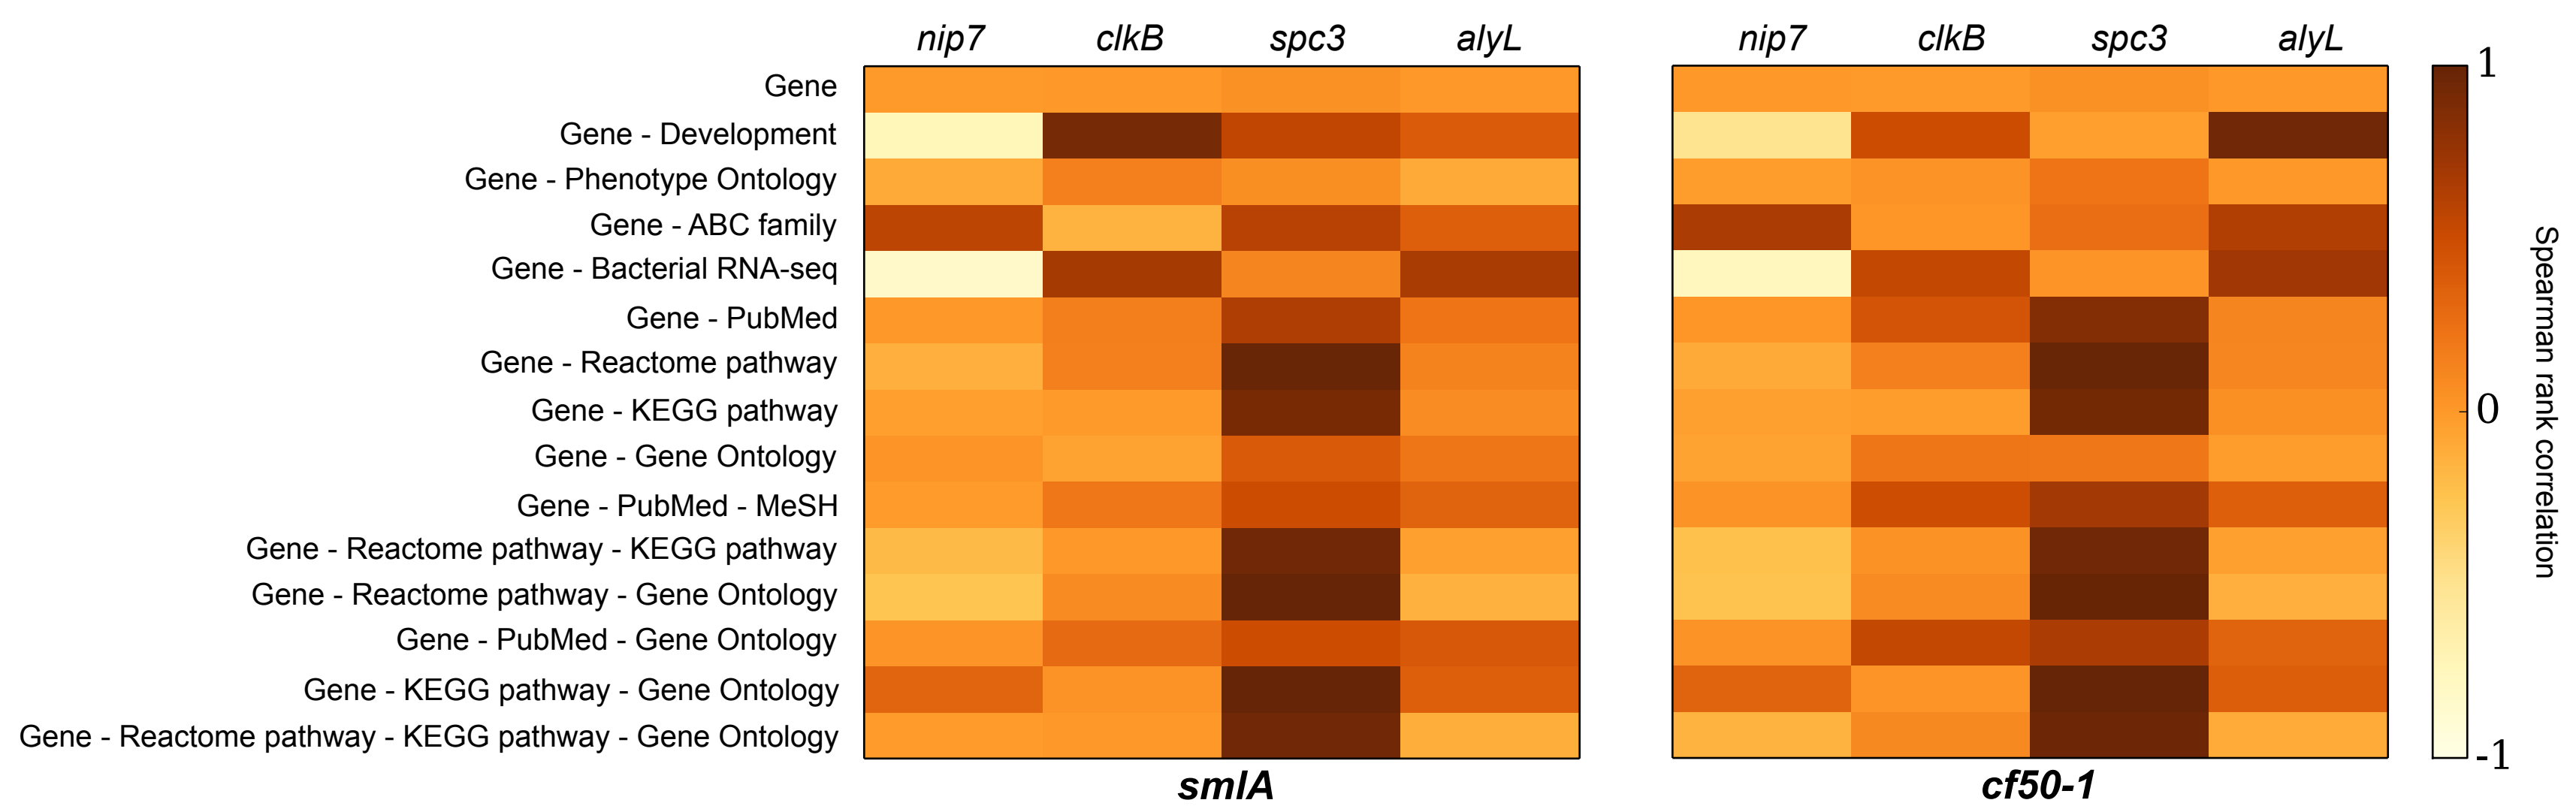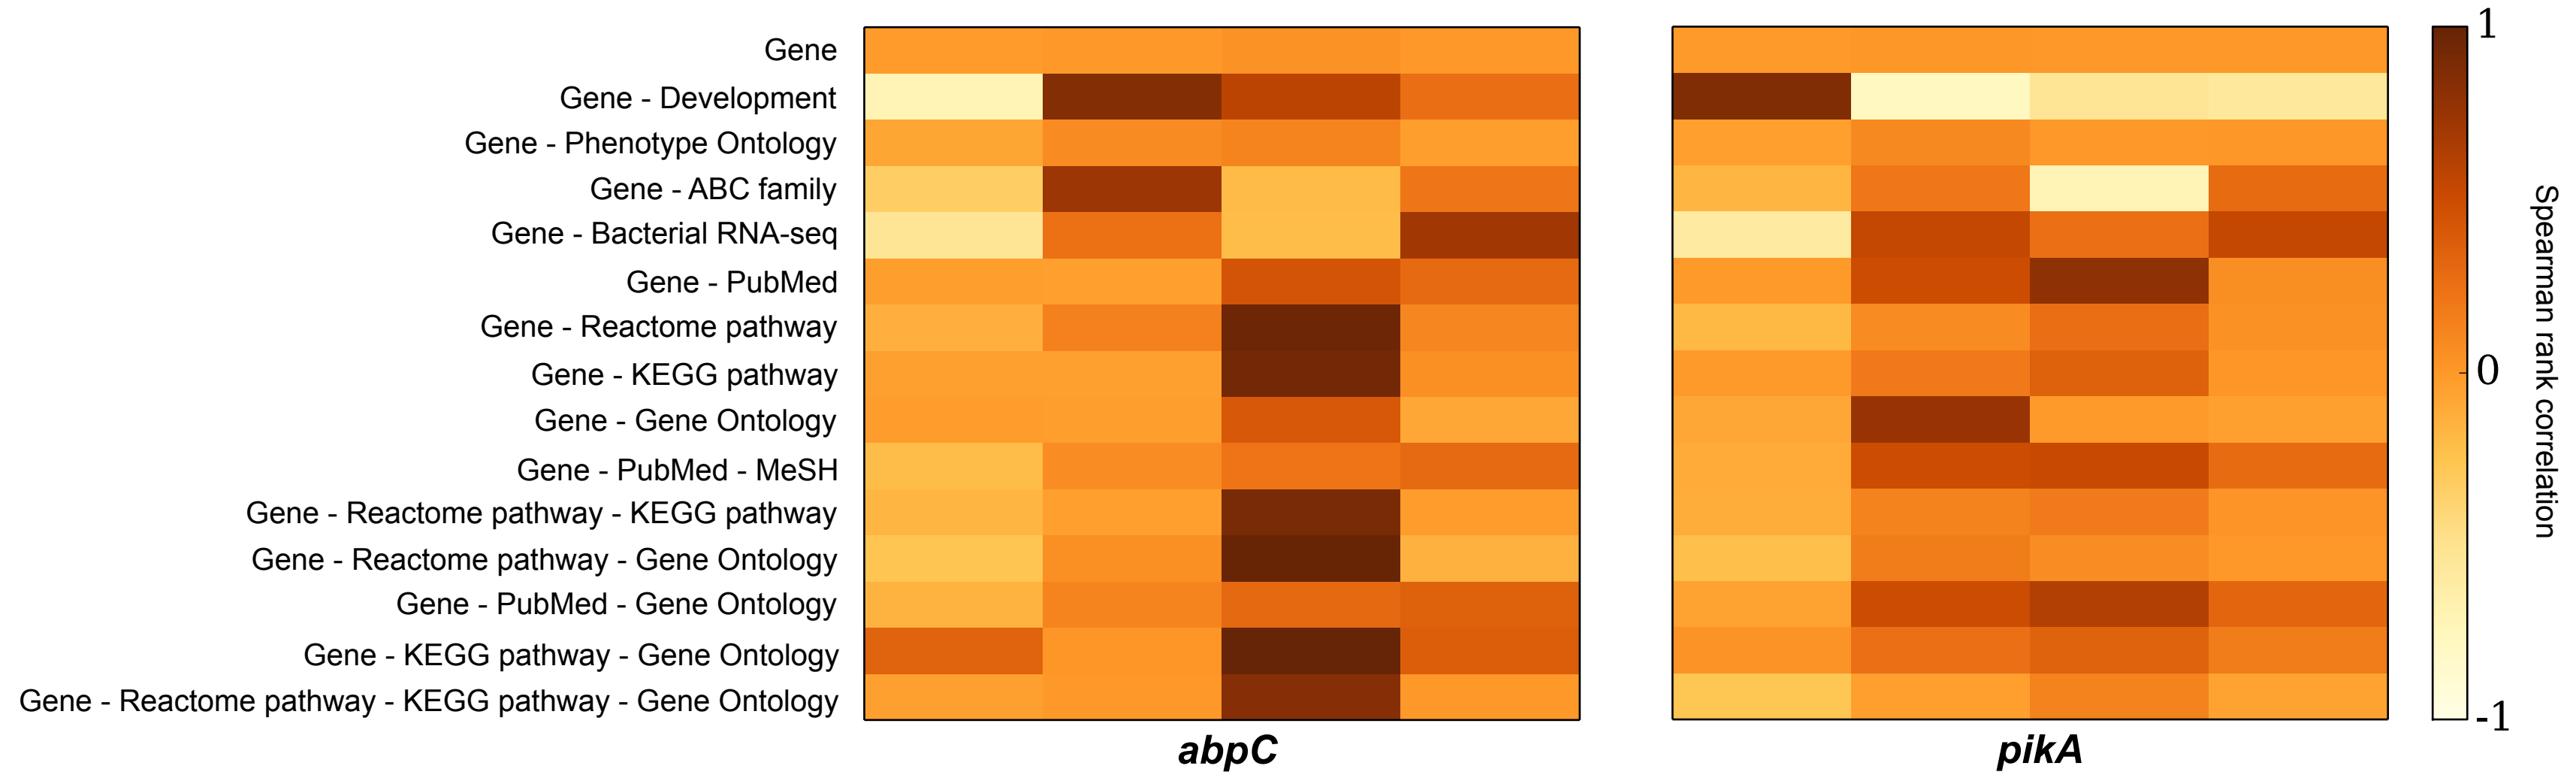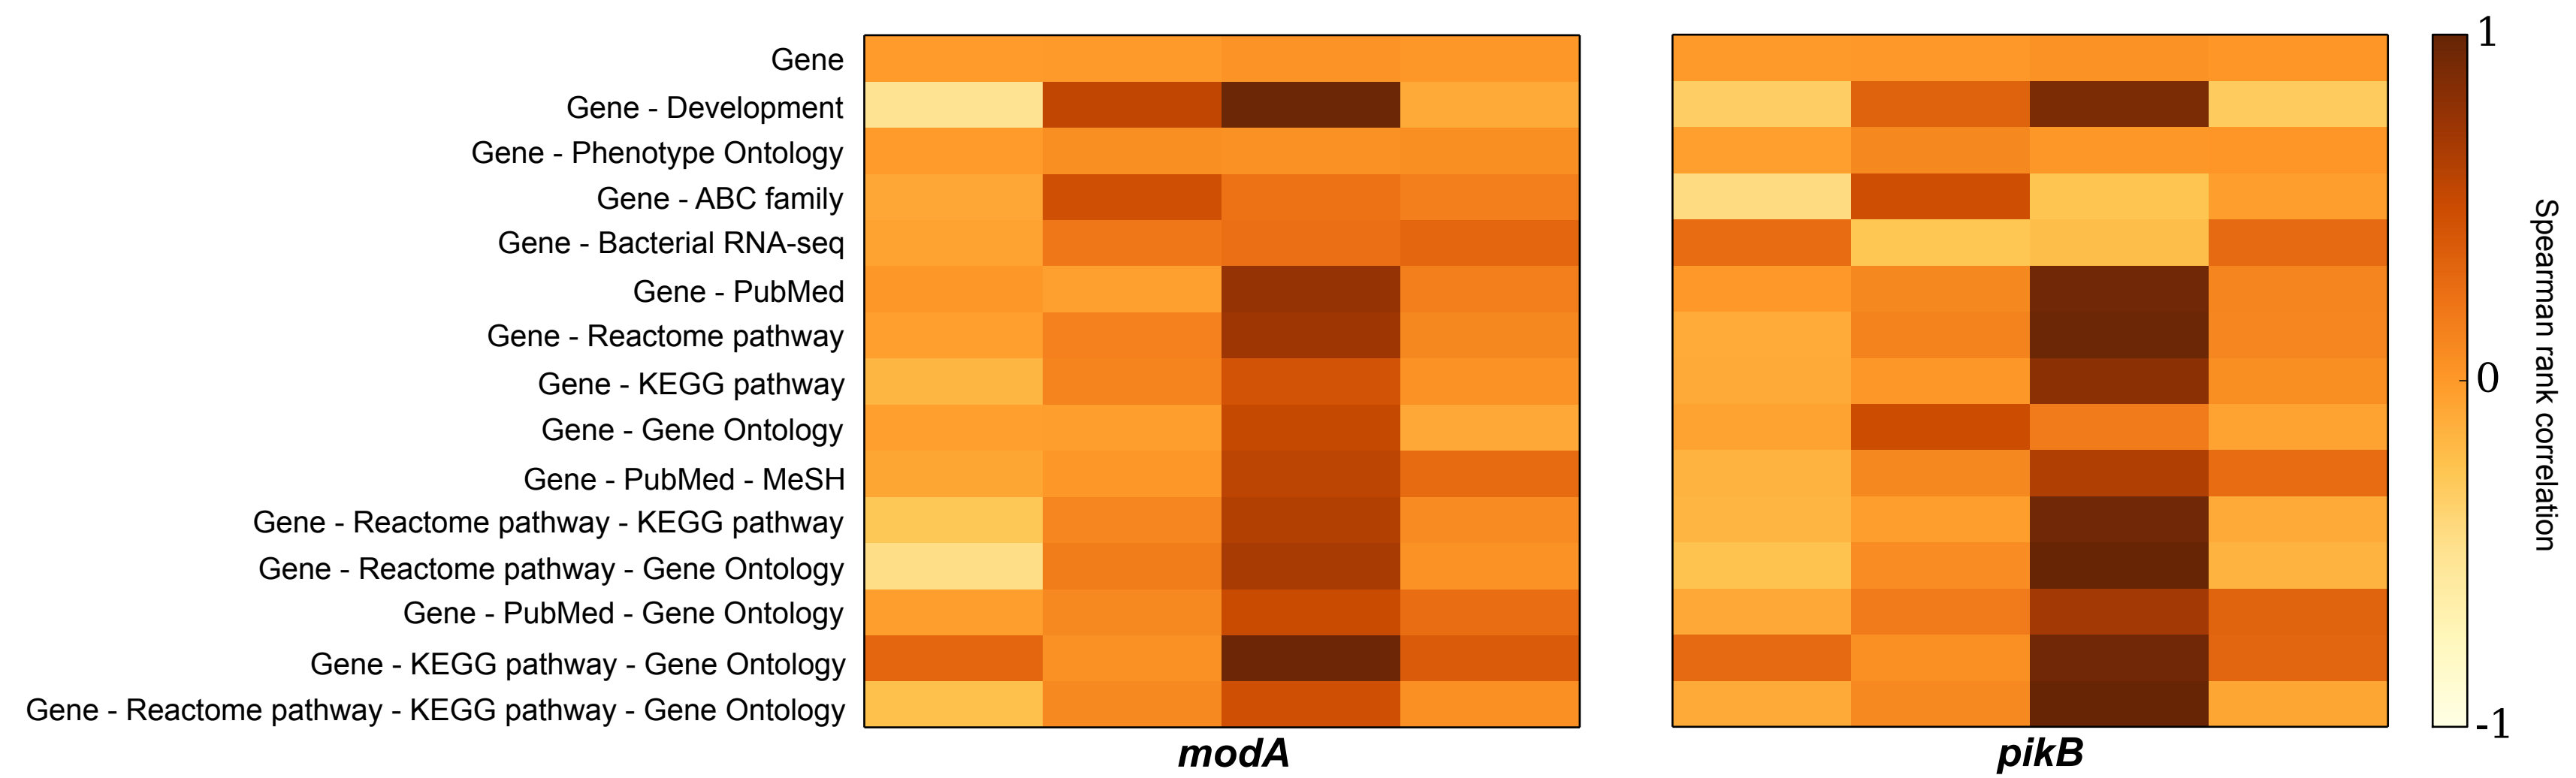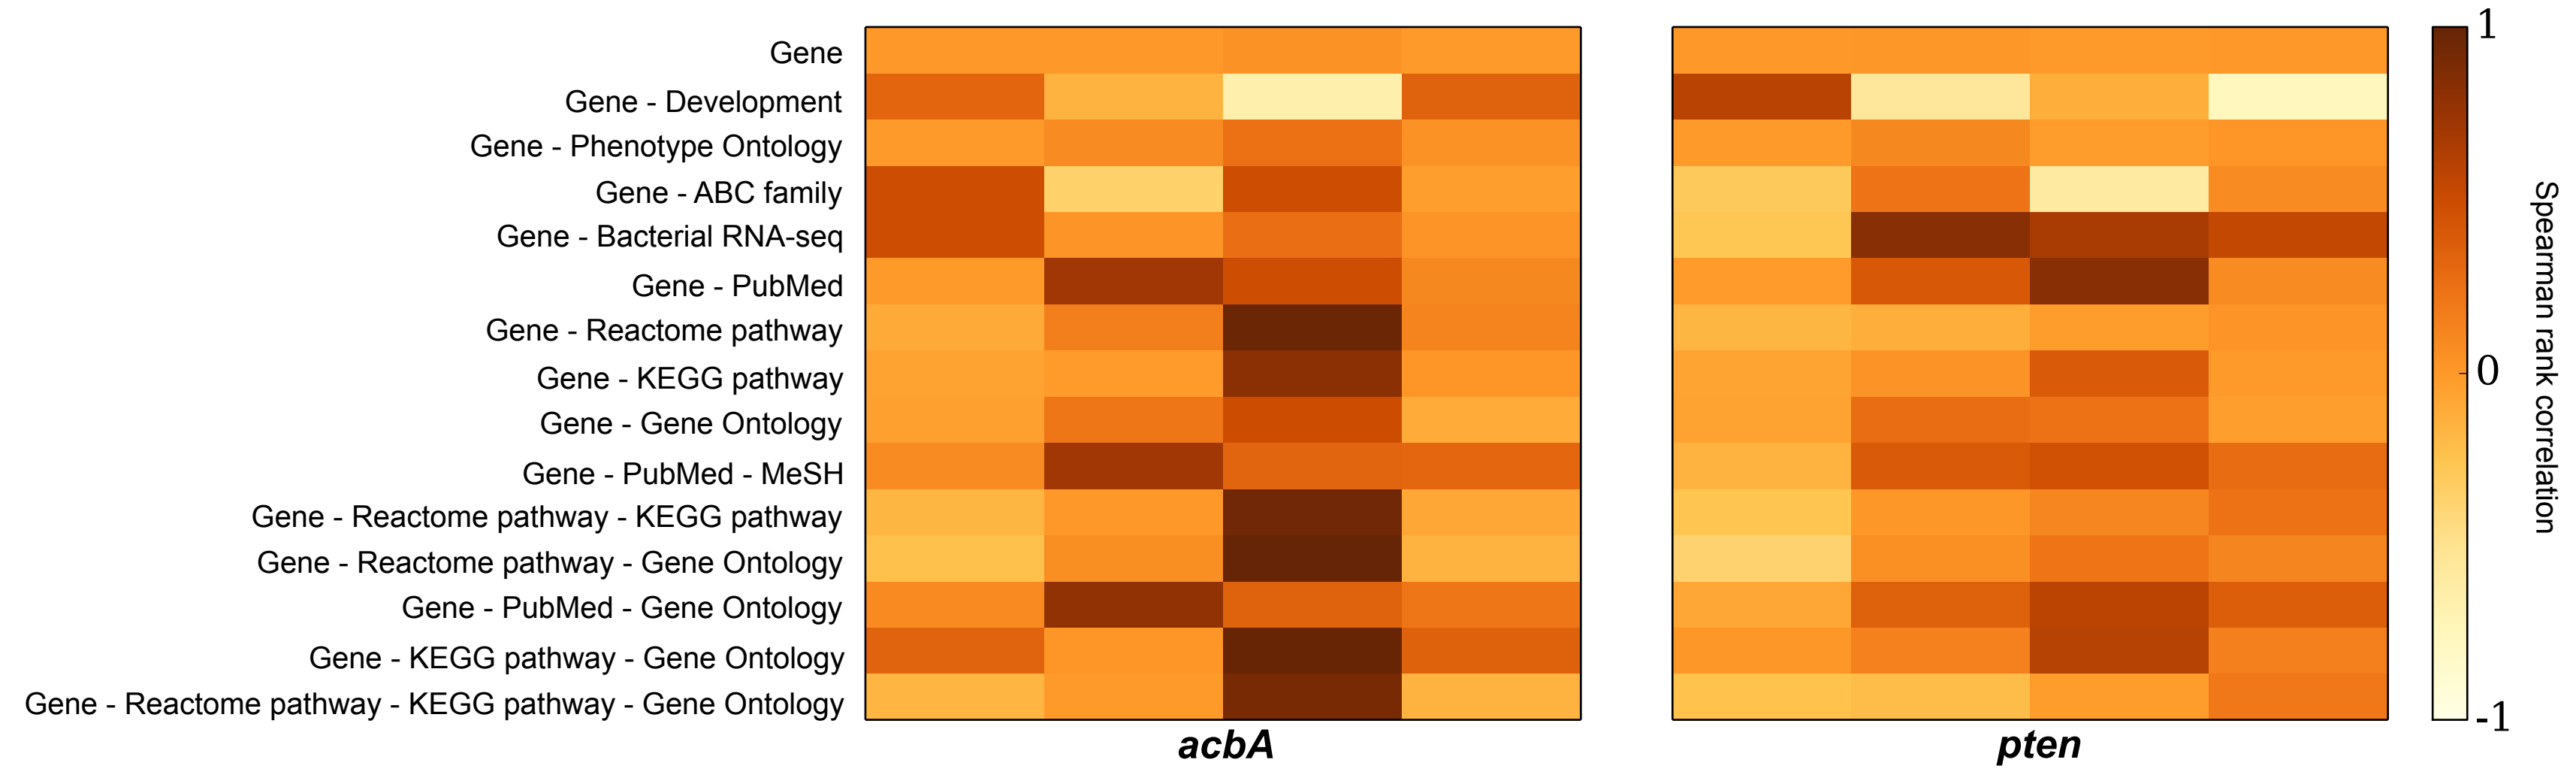

Supplement: Supplementary file 1 [file 1 › S6_Fig.pdf]

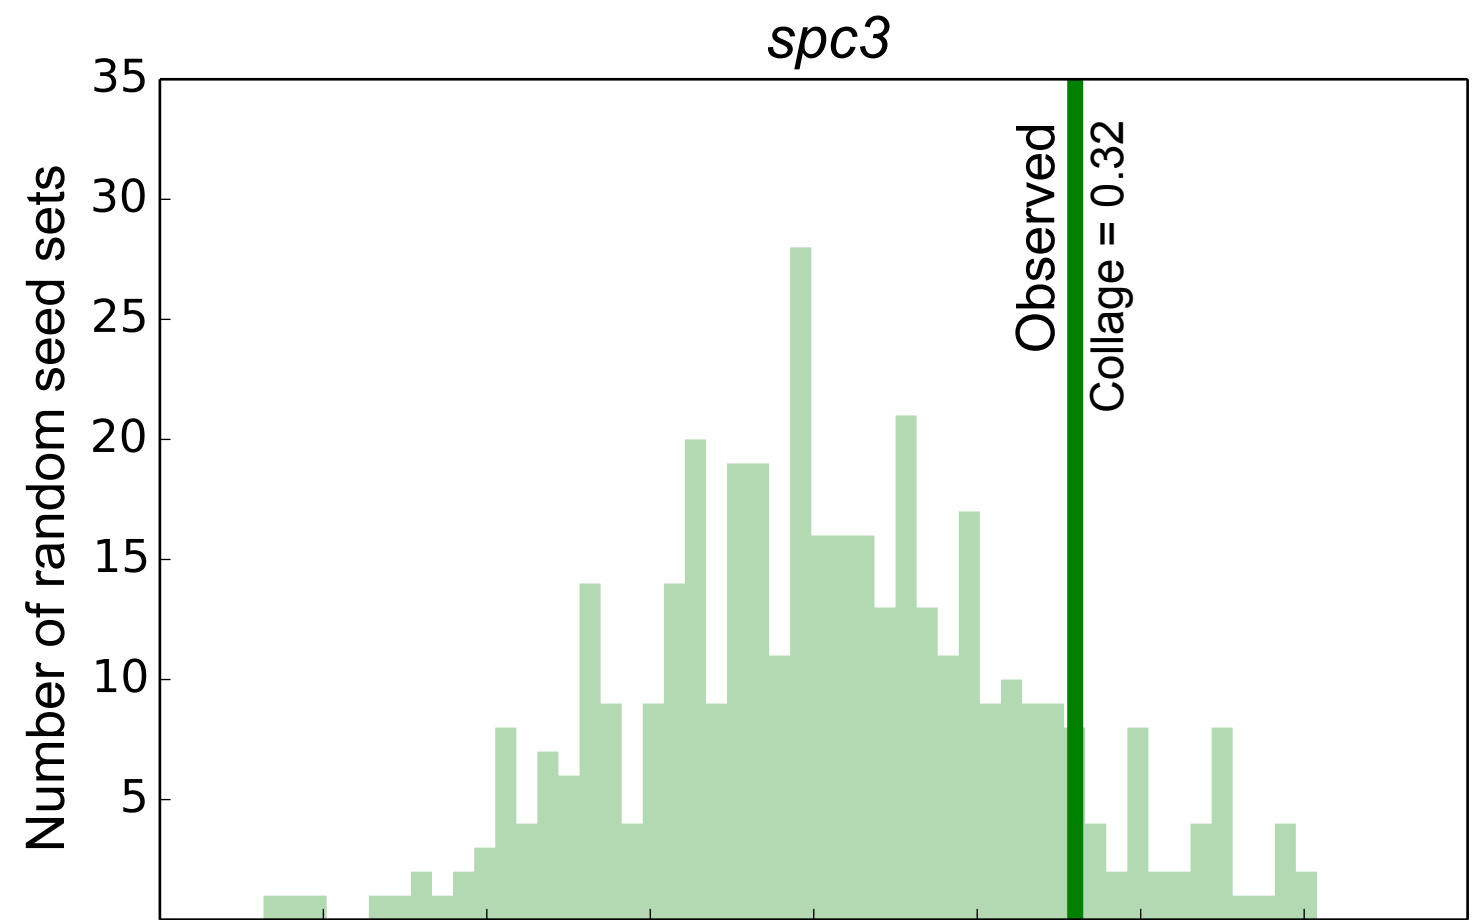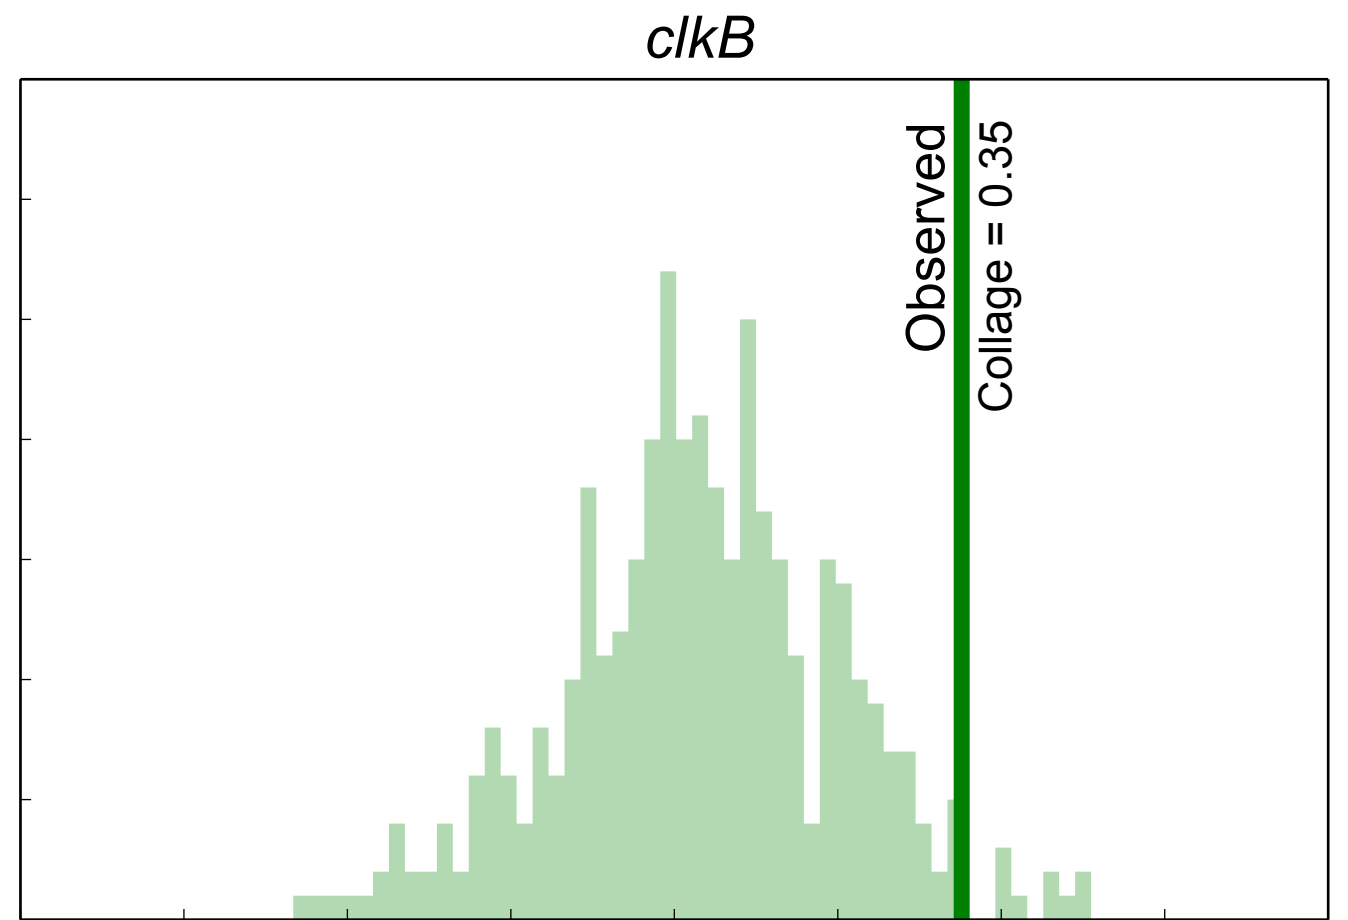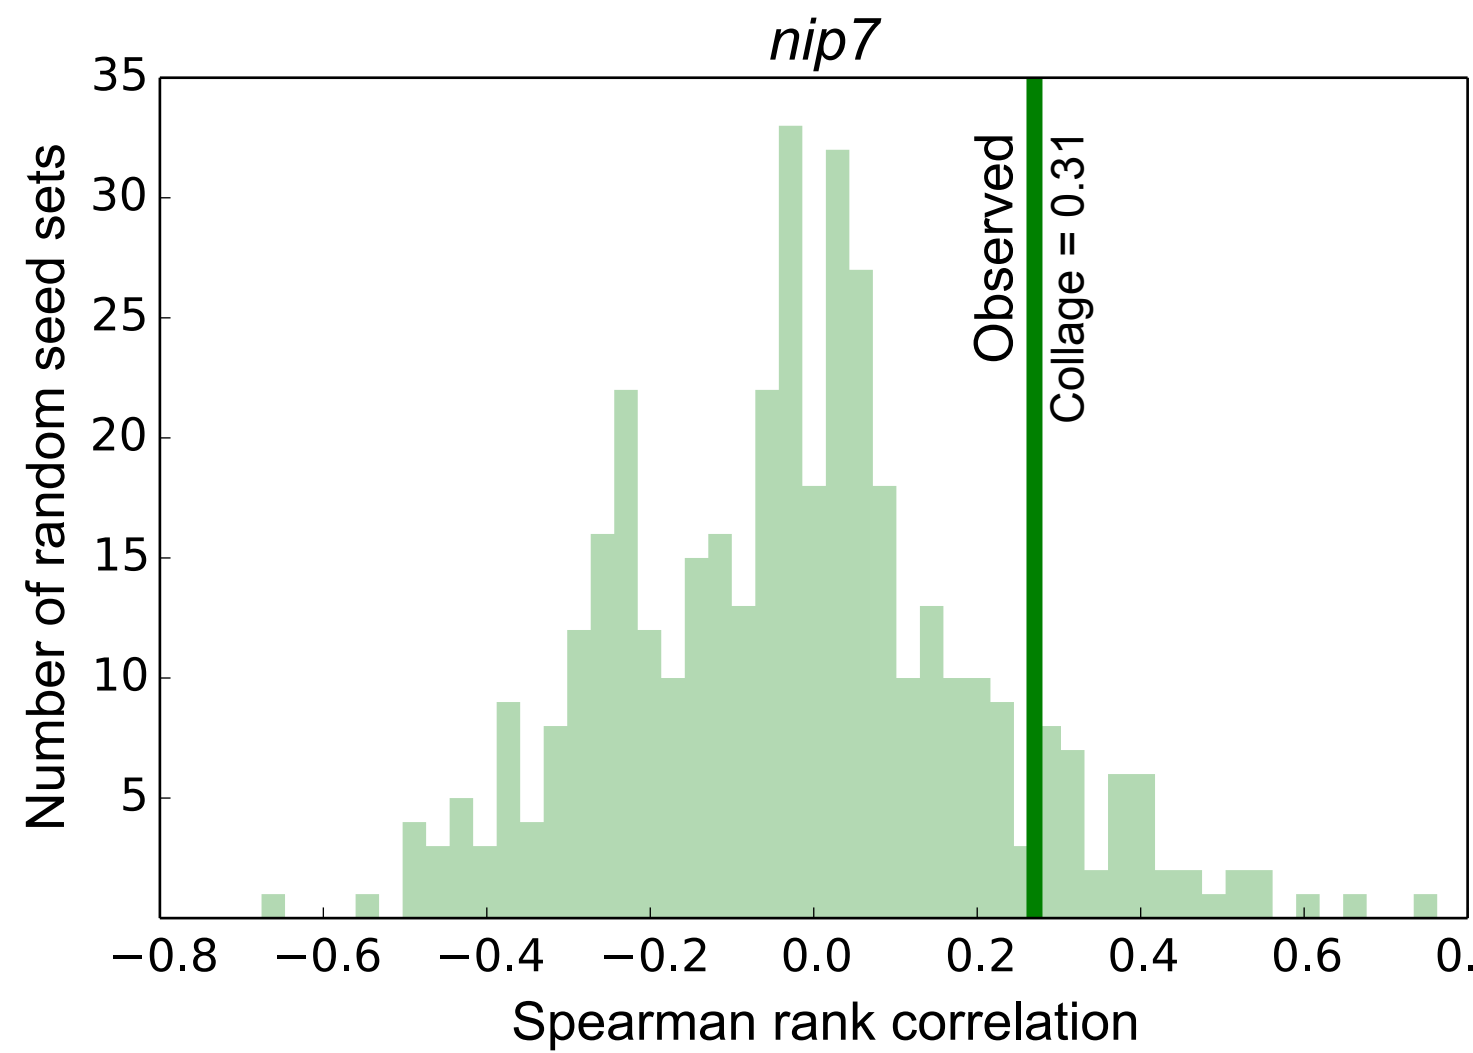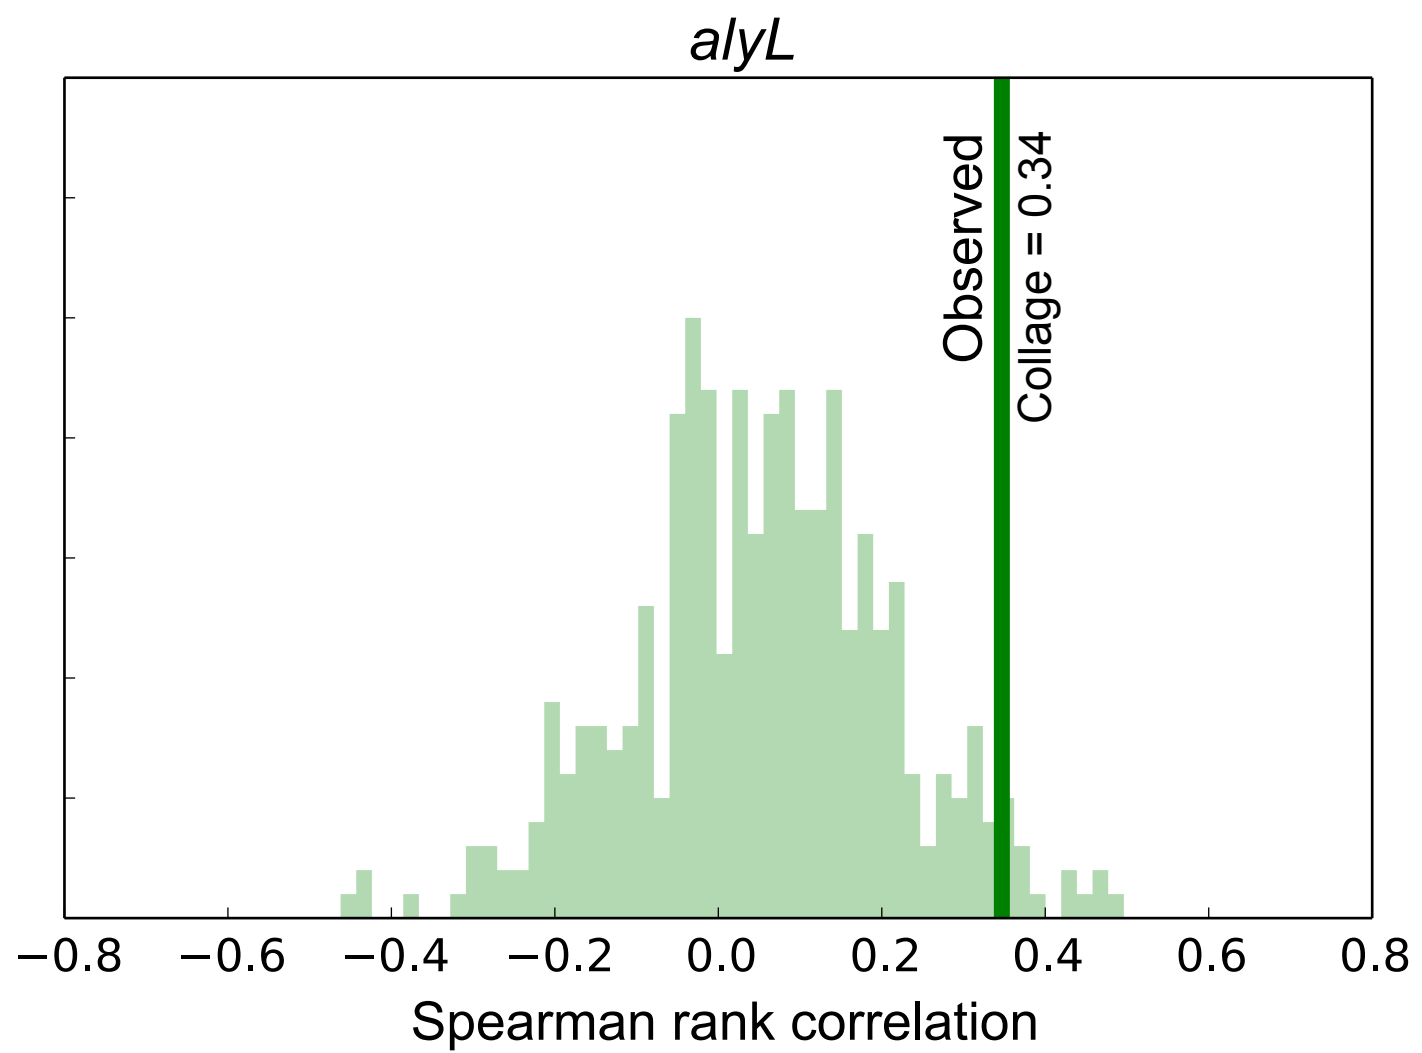

Supplement: Supplementary file 1 [file 1 › S7_Fig.pdf]

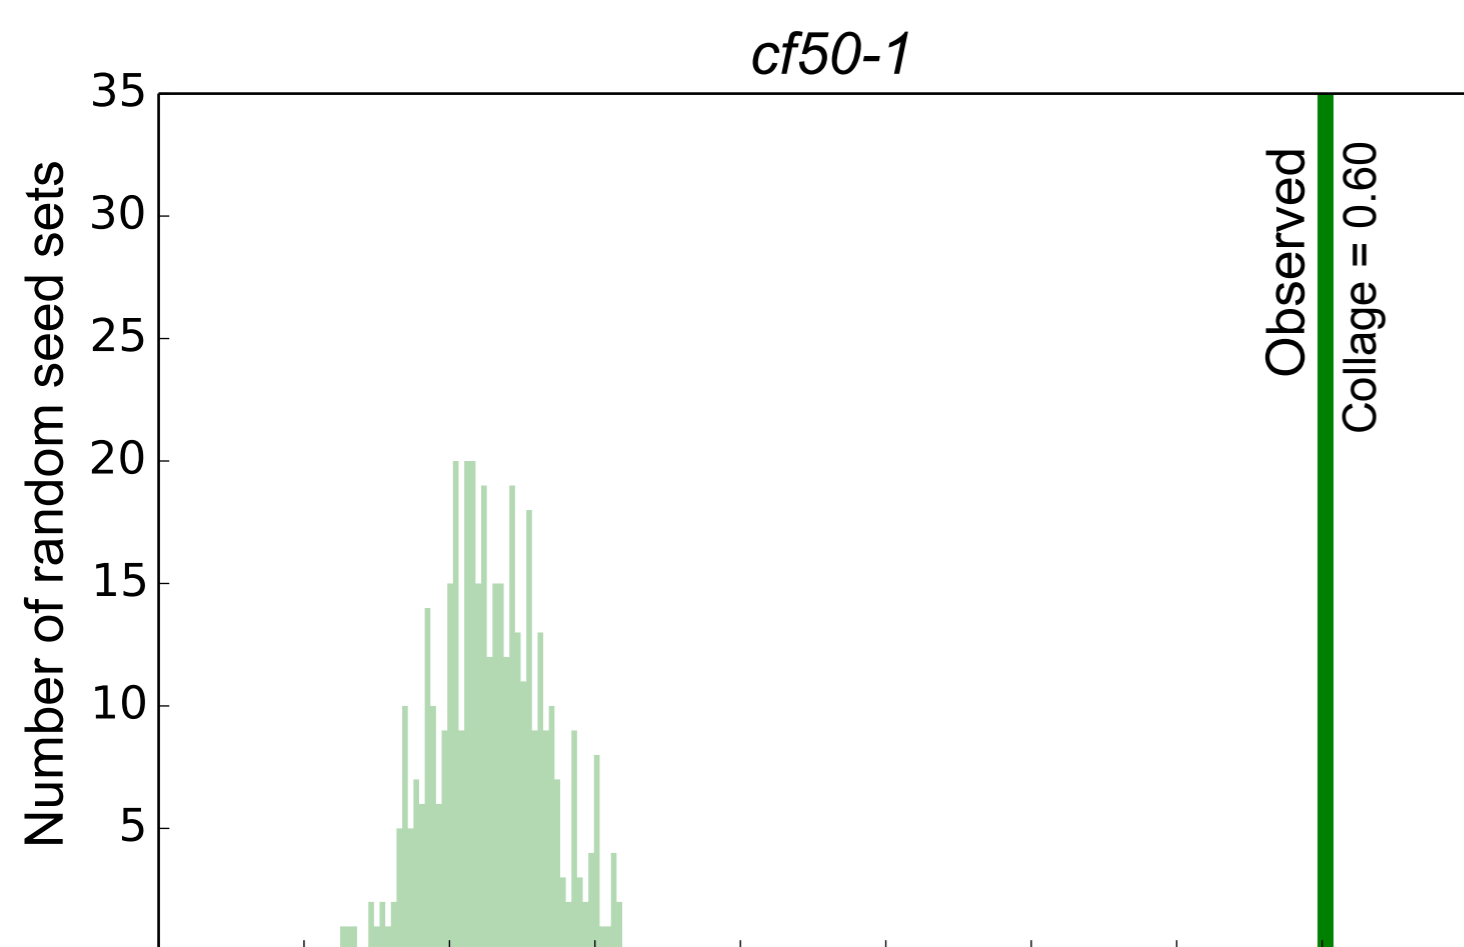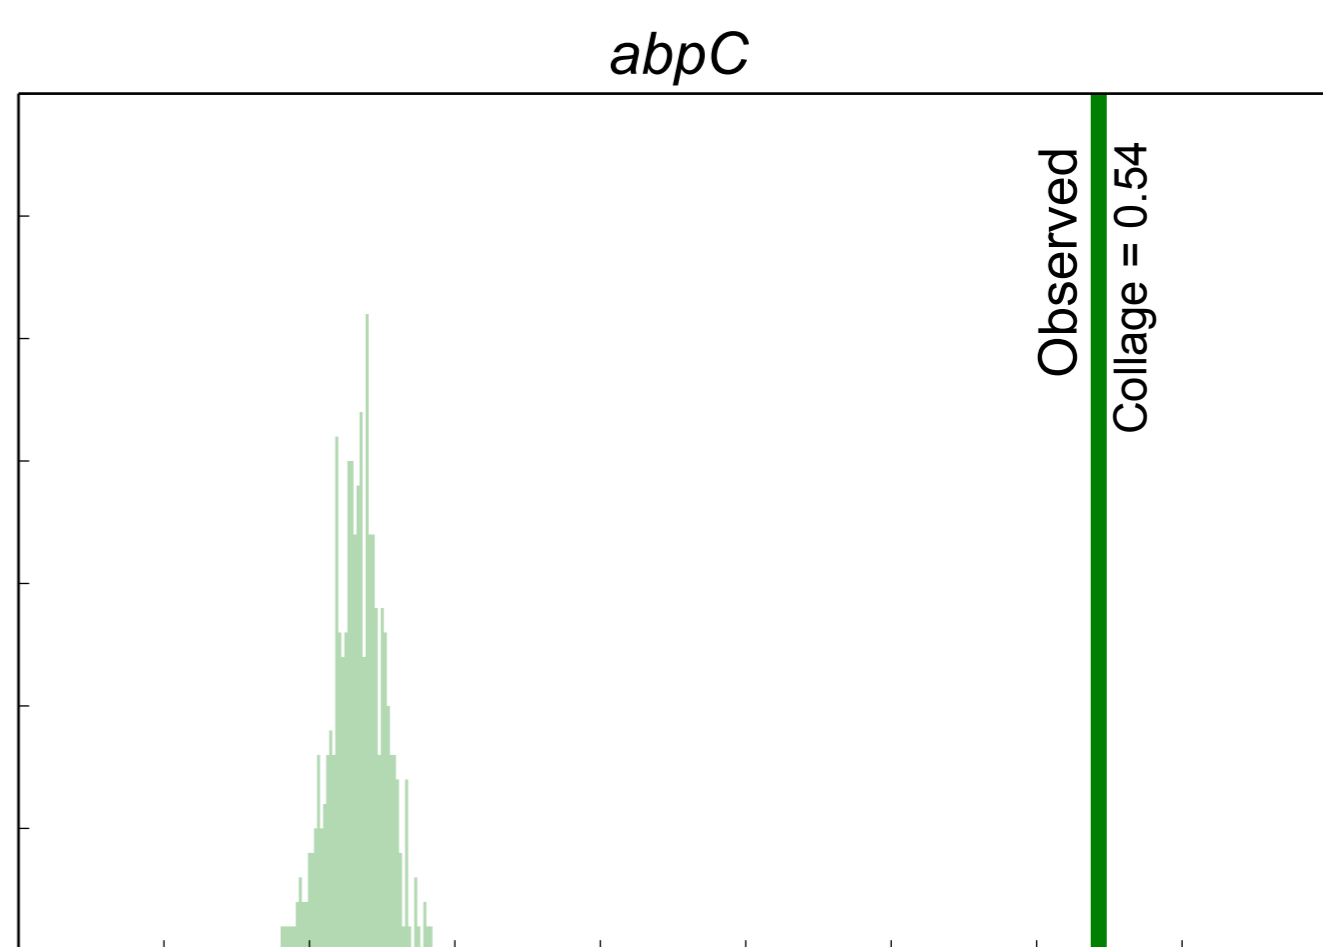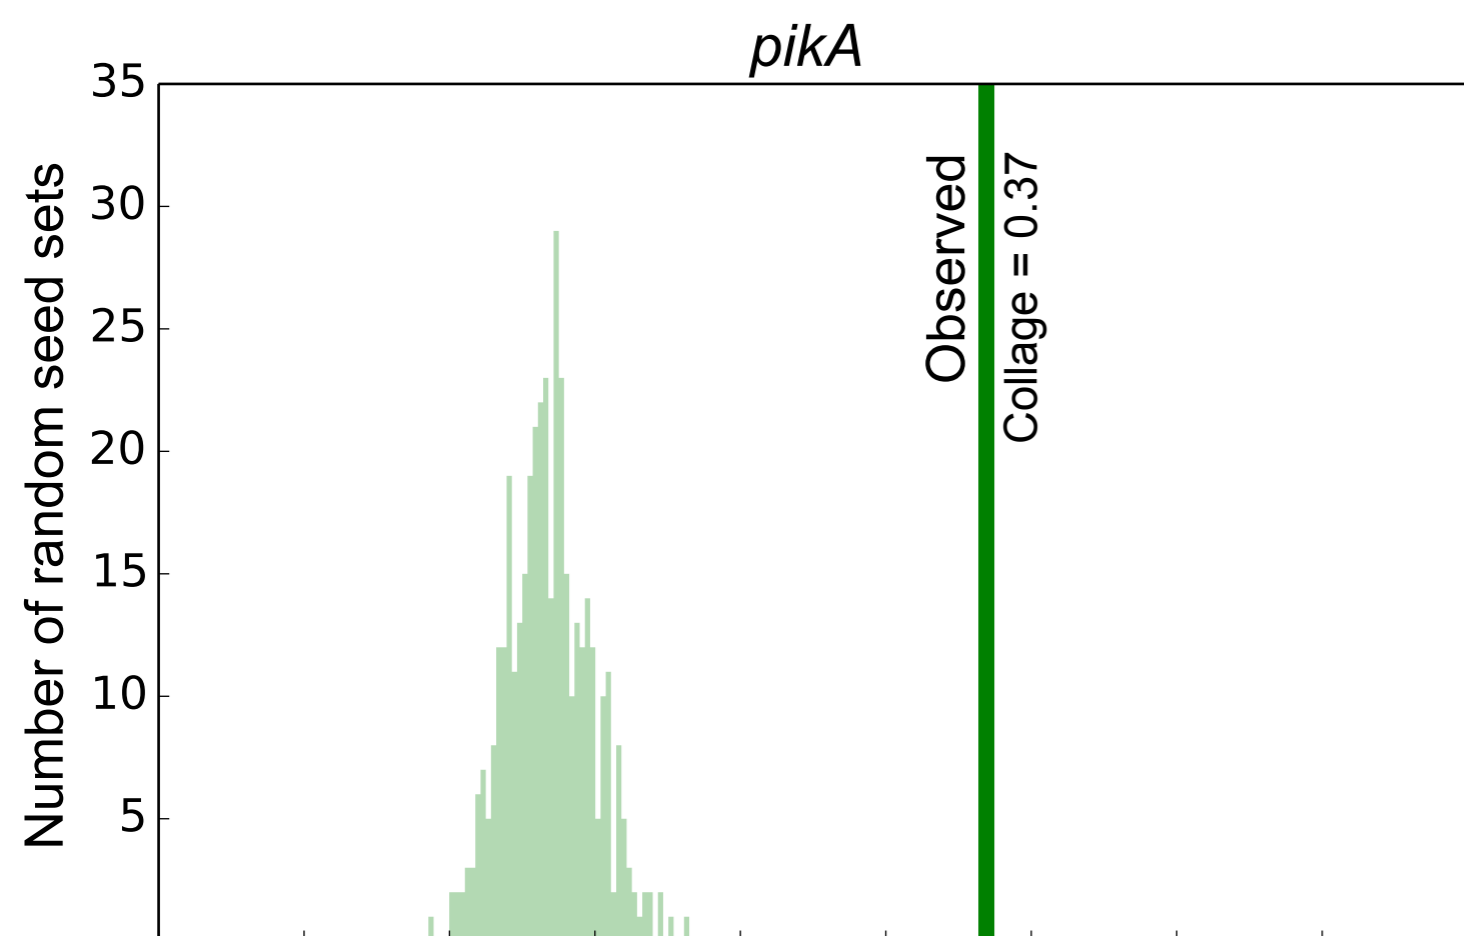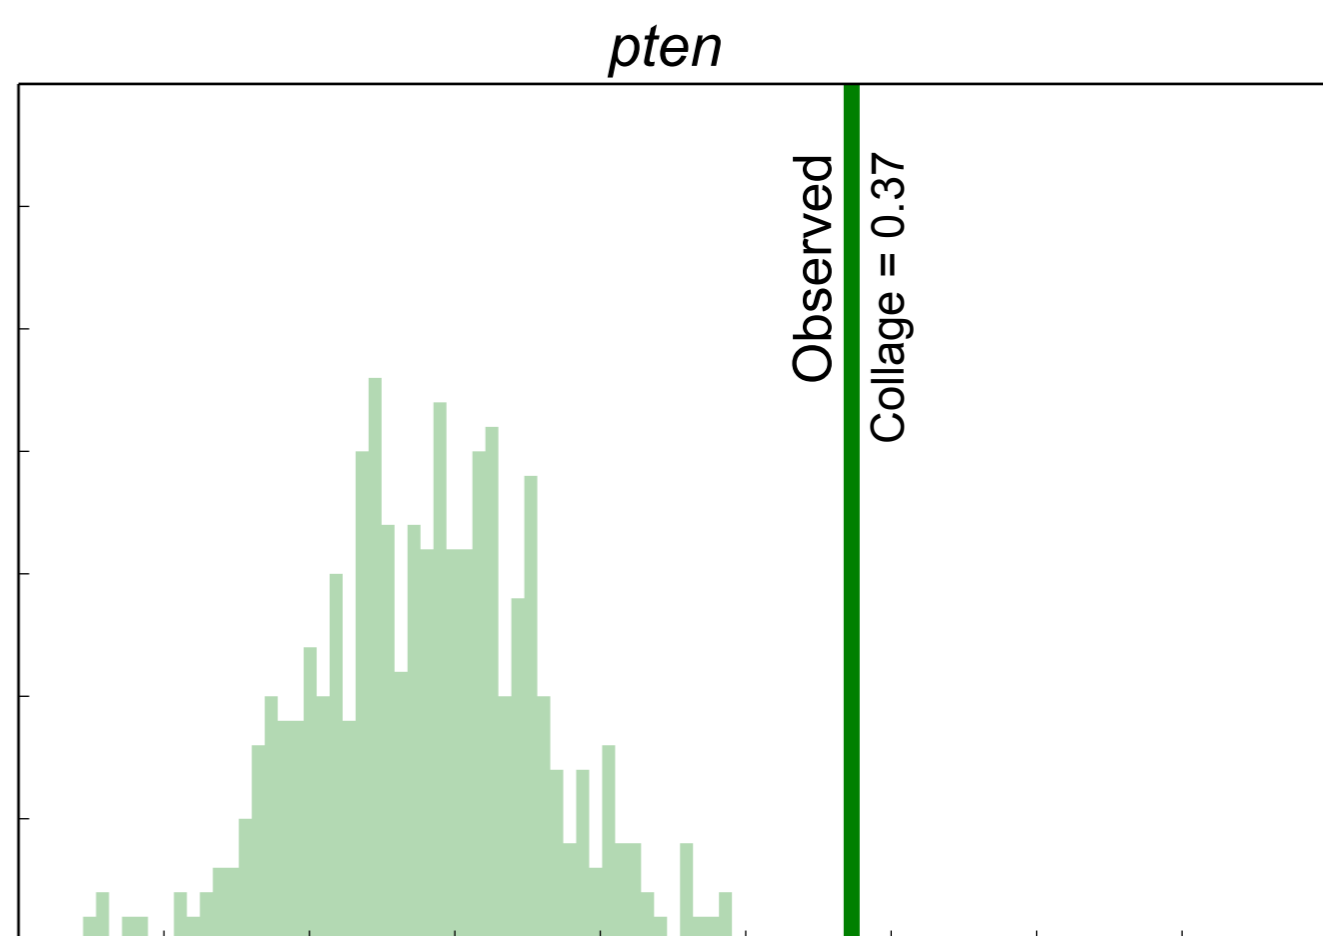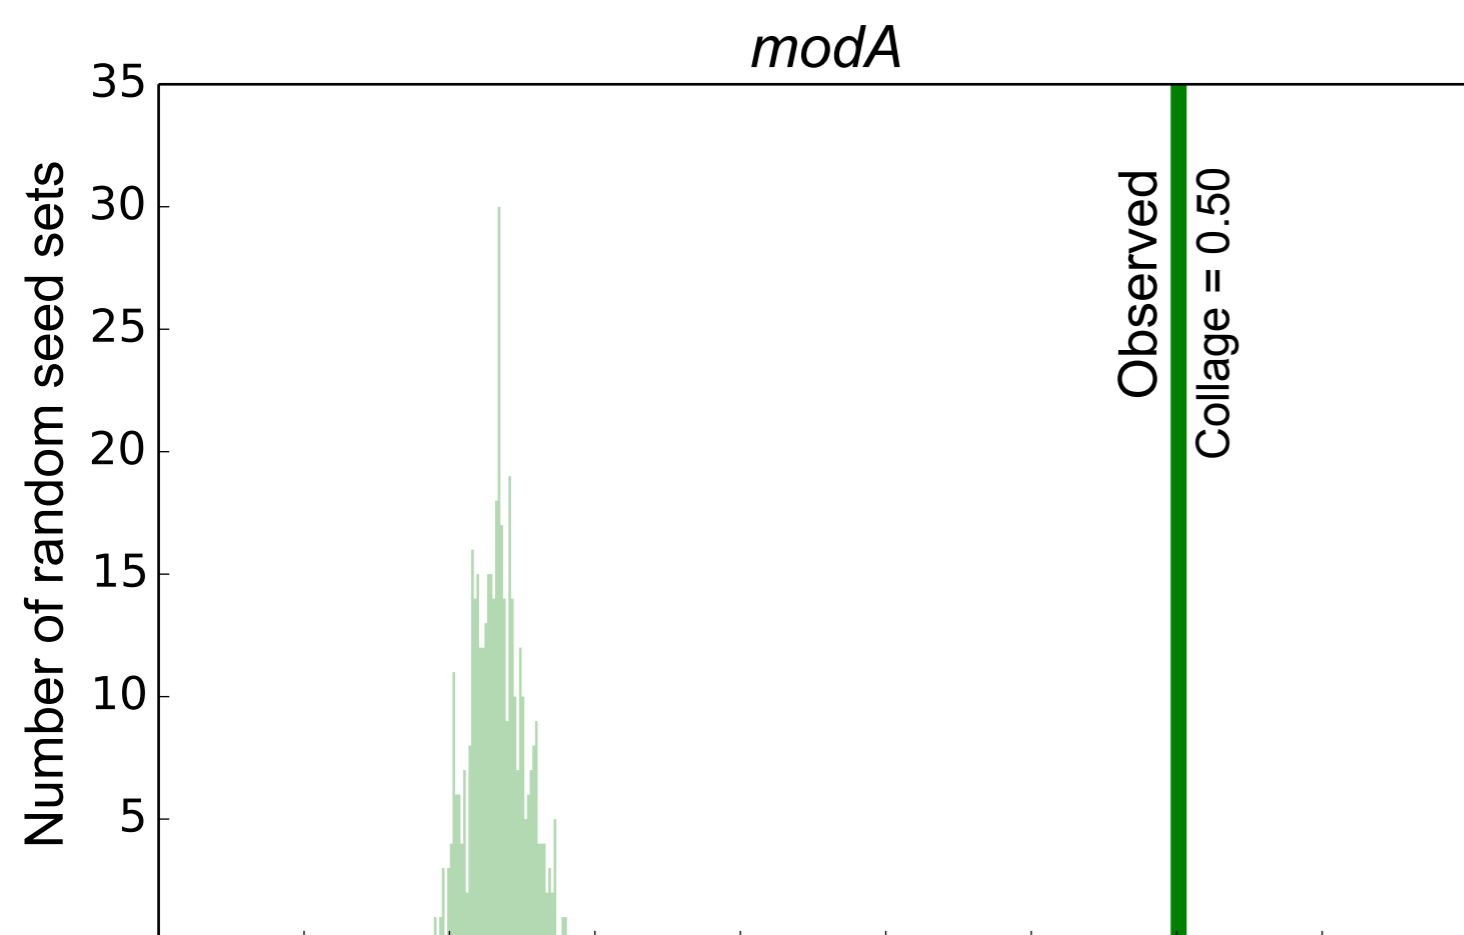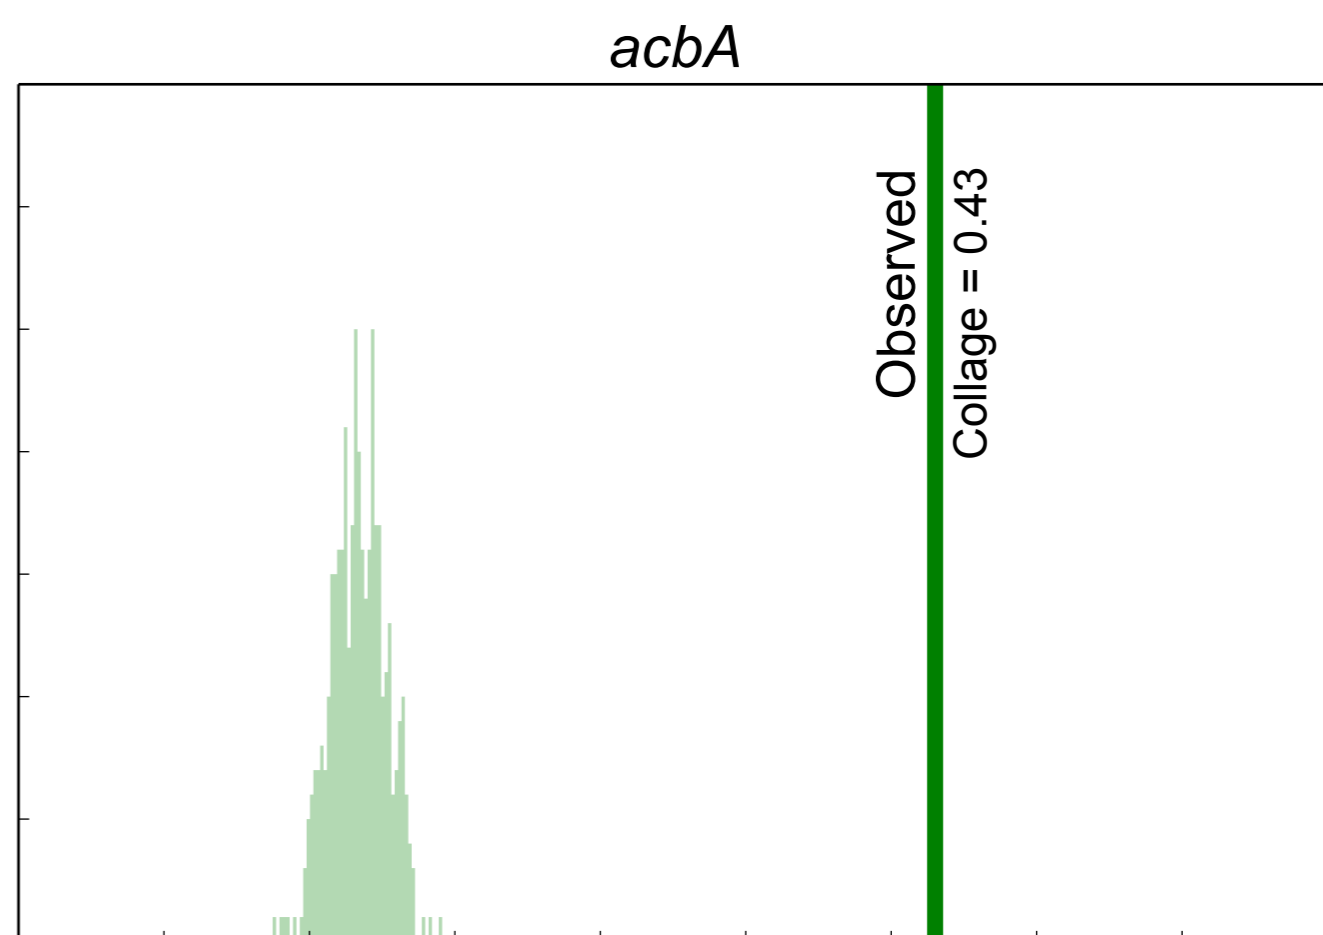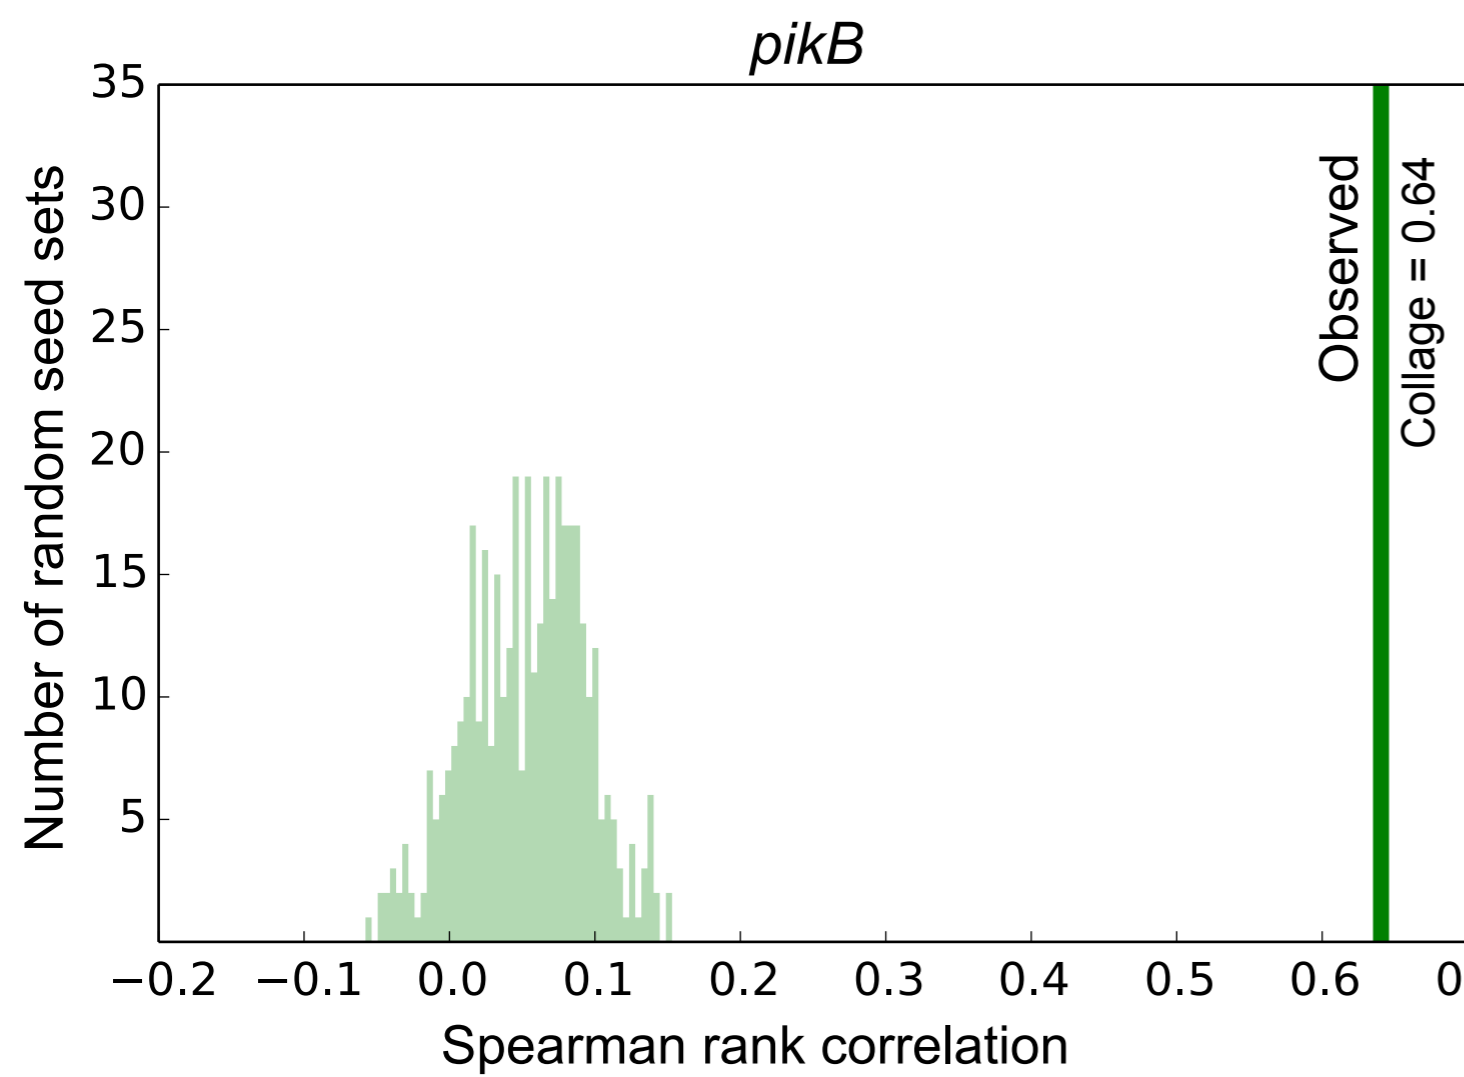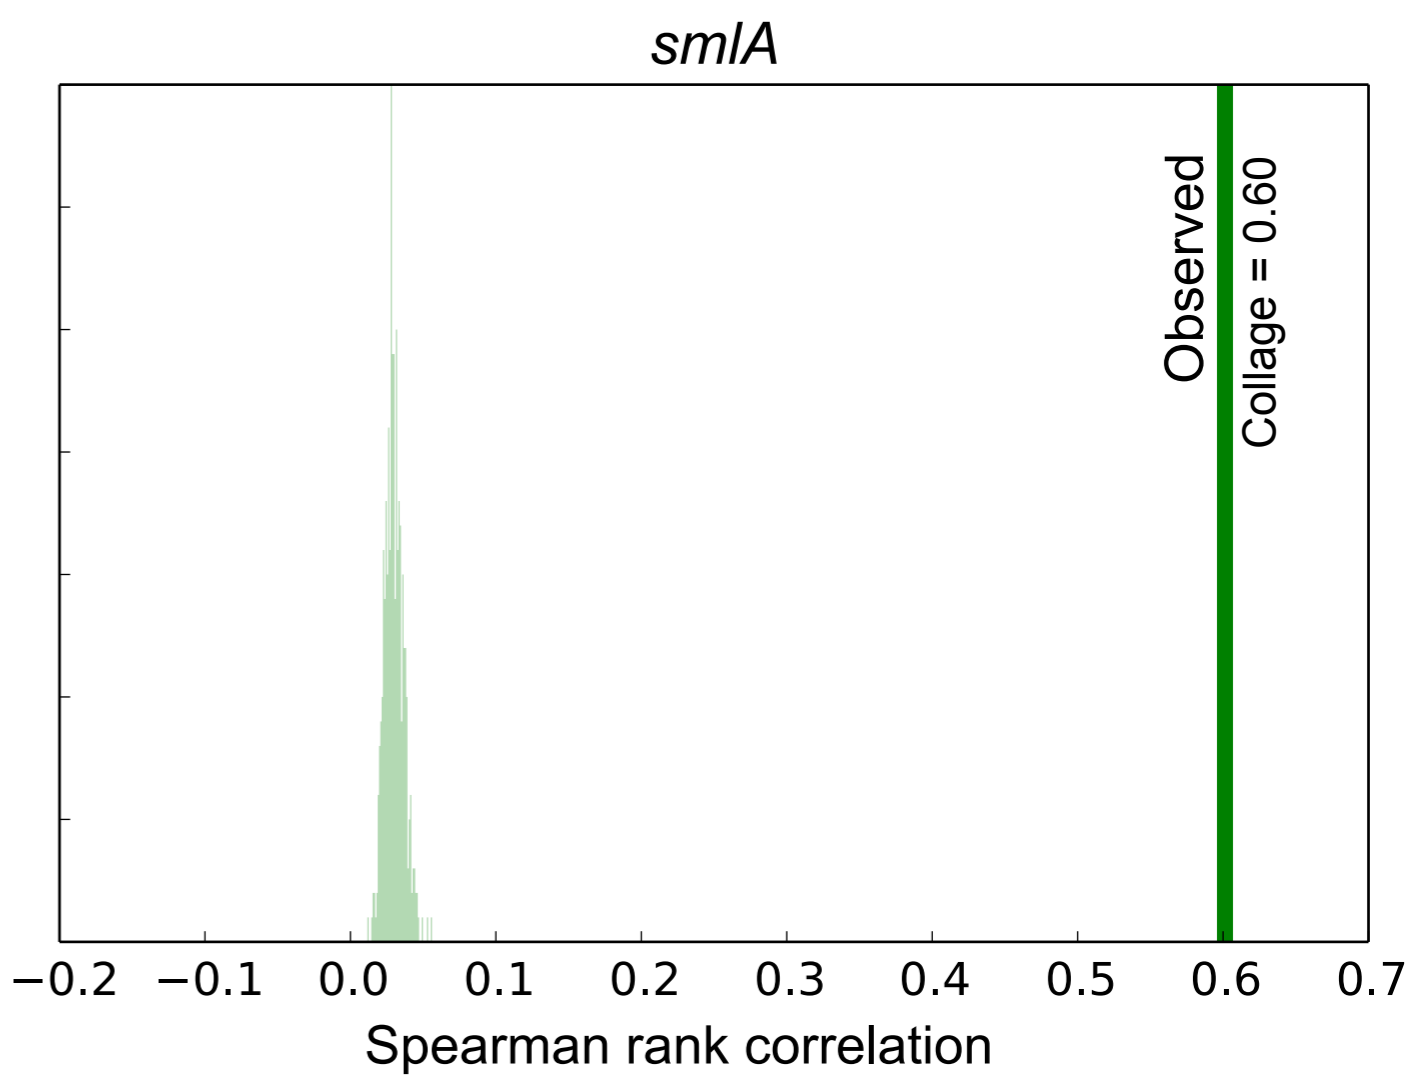

Supplement: Supplementary file 1 [file 1 › S8_Fig.pdf]

**a**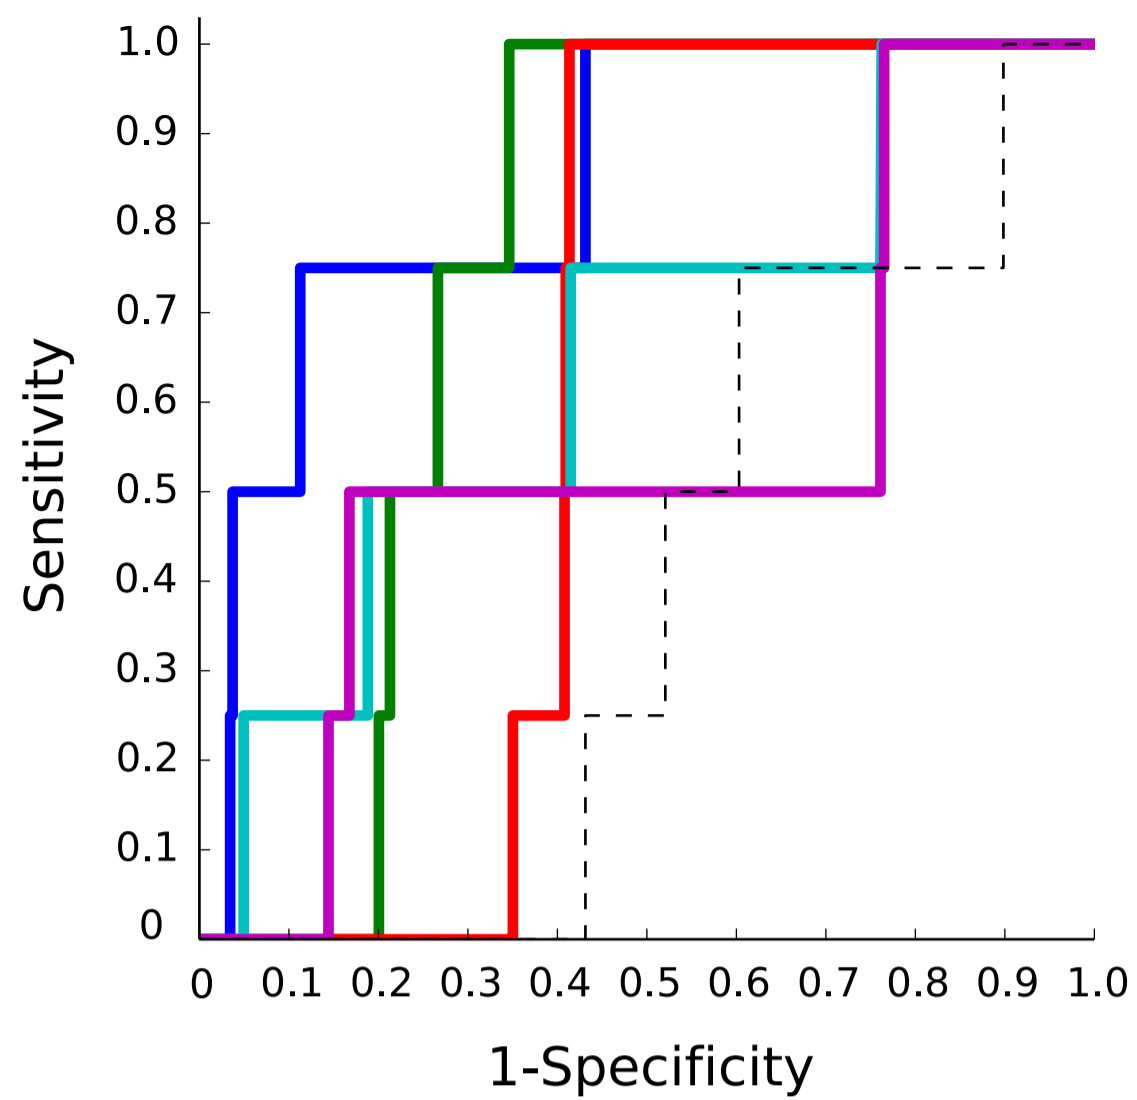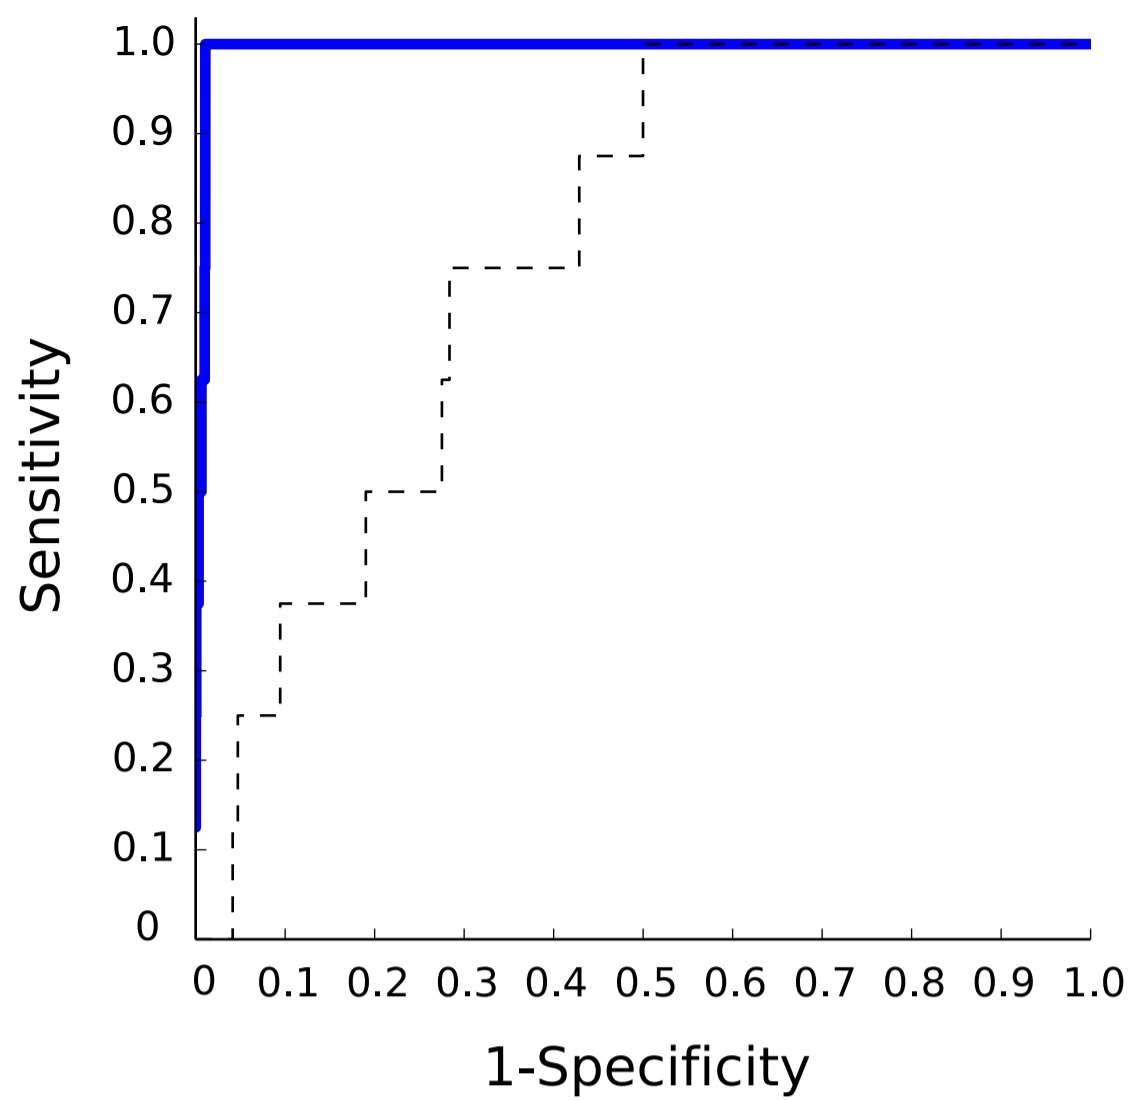**b**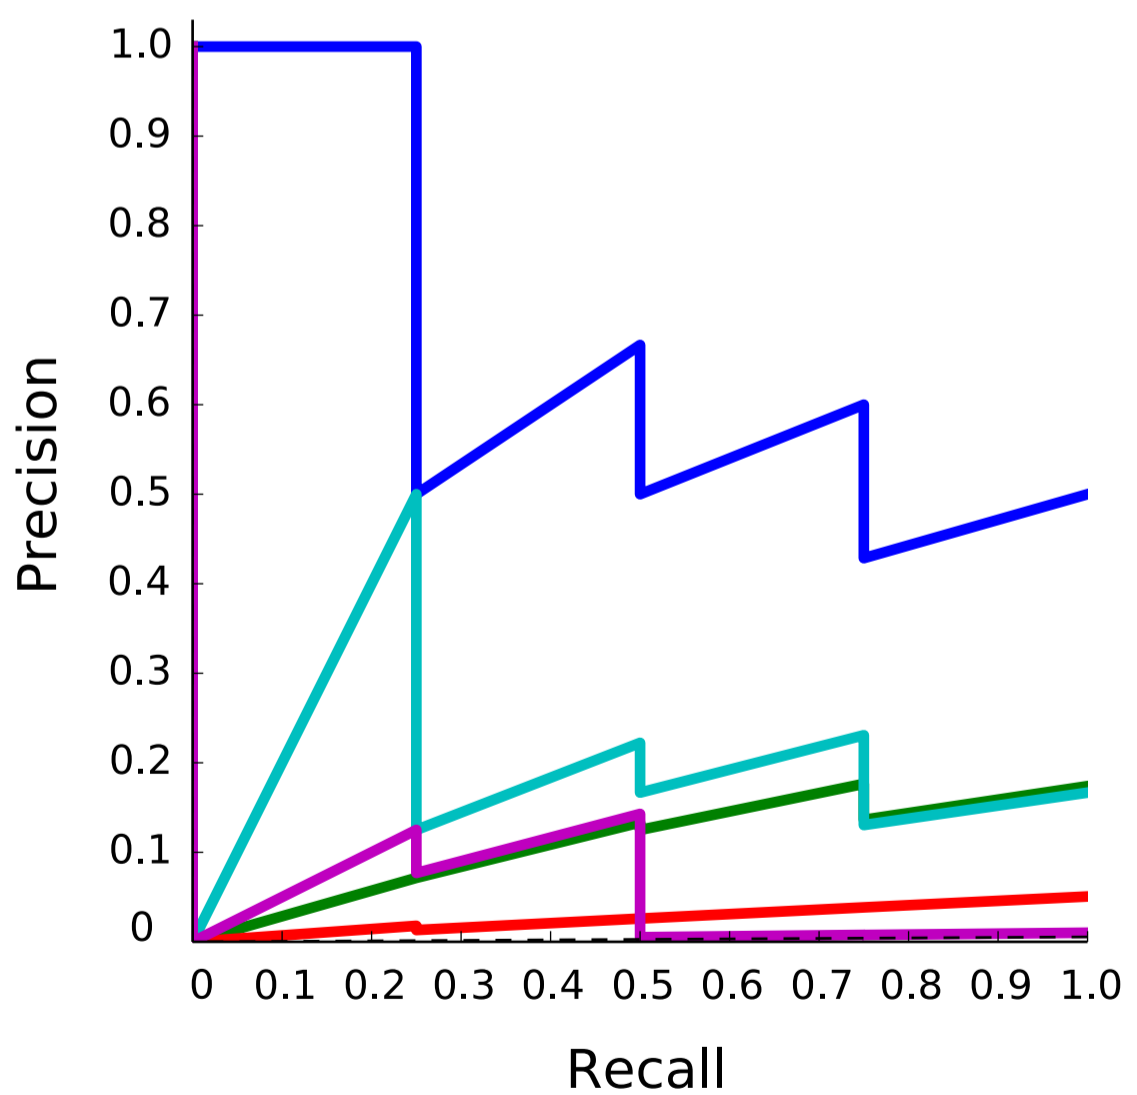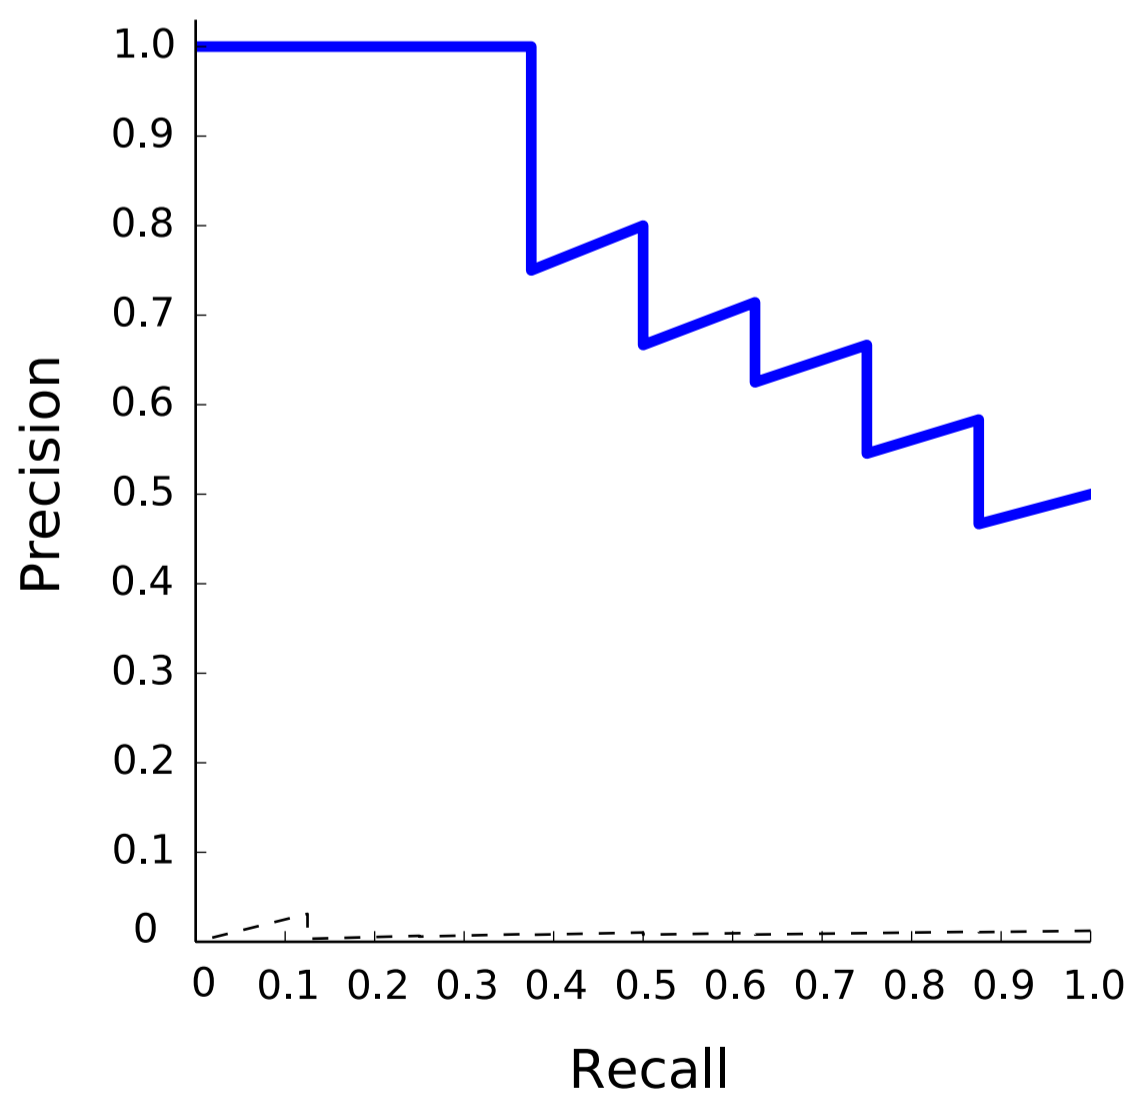

Supplement: Supplementary file 1 [file 1 › S9_Fig.pdf]
